1 **Title: Early pre-neural serotonin modulates balance of late monoamines and behavioral patterns in**  
2 **fish model system**

3 Evgeny Ivashkin<sup>1,2,3,#</sup>, Stefan Spulber<sup>4</sup>, Andrei Zinovyev<sup>5,6,7</sup>, Takashi Yoshitake<sup>1</sup>, Shimako Yoshitake<sup>1</sup>, Olga  
4 Kharchenko<sup>2</sup>, Marina Yu. Khabarova<sup>2</sup>, Spyridon Theofilopoulos<sup>8,9</sup>, Jan Kehr<sup>1</sup>, Ernest Arenas<sup>8</sup>, Sandra  
5 Ceccatelli<sup>4</sup>, Elena E. Voronezhskaya<sup>2</sup> and Igor Adameyko<sup>1,10,#</sup>

6

7 # - corresponding authors: [eivashkin@mbl.edu](mailto:eivashkin@mbl.edu), [igor.adameyko@ki.se](mailto:igor.adameyko@ki.se)

8 <sup>1</sup>Department of Physiology and Pharmacology, Karolinska Institutet, 171 77 Stockholm, Sweden

9 <sup>2</sup>Institute of Developmental Biology, Russian Academy of Sciences, 119334 Moscow, Russia

10 <sup>3</sup>Josephine Bay Paul Center for Comparative Molecular Biology and Evolution, Marine Biological  
11 Laboratory, 02543 Woods Hole, MA, USA

12 <sup>4</sup>Department of Neuroscience, Karolinska Institutet, 171 77 Stockholm, Sweden

13 <sup>5</sup>Institut Curie, PSL Research University, F-75005 Paris

14 <sup>6</sup>INSERM, U900, F-75005 Paris, France

15 <sup>7</sup>MINES ParisTech, PSL Research University, CBIO-Centre for Computational Biology, F-75006 Paris, France

16 <sup>8</sup>Laboratory of Molecular Neurobiology, Department of Medical Biochemistry and Biophysics, Karolinska  
17 Institutet, 171 77 Stockholm, Sweden

18 <sup>9</sup>Regenerative Neurobiology Laboratory, Swansea University Medical School, Institute of Life Science 1,  
19 Swansea, SA2 8PP, UK

20 <sup>10</sup>Department of Molecular Neurosciences, Center of Brain Research, Medical University of Vienna, A-  
21 1090 Vienna, Austria

22

23 **Summary**

24 The presence of serotonergic system during early pre-neural development is enigmatic  
25 and conserved amongst all studied invertebrate and vertebrate animals. We took advantage of  
26 zebrafish model system to address what is the role of early serotonin before first neurons form.  
27 Unexpectedly, we experimentally revealed the existence of delayed developmental neurogenic  
28 and behavioral effects resulting from the manipulations of pre-neural (zygote, blastula and  
29 gastrula) serotonergic system. In particular, the delayed effects included differences in the  
30 synthesis of serotonin in early serotonergic neurons in the central nervous system as well as in  
31 behavioral alterations after habituation in zebrafish larvae. These effects appeared as highly  
32 specific and did not coincide with any major abnormalities. The same manipulations of the  
33 serotonergic system at neural developmental stages did not show such effects, which confirms  
34 that early effects of serotonergic system manipulation are not based on retained serotonin in  
35 embryonic cells. Accordingly, gene expression analysis demonstrated specific changes only in  
36 response to the elevation of early pre-neural serotonin, which included the delayed and pre-  
37 mature onsets of different gene expression programs. Taken together, our results introduce a  
38 novel function of early pre-neural serotonergic system in a vertebrate embryo – tuning and fine  
39 control of specific mechanisms at later neural developmental stages that result in a mild  
40 variation of a behavioral adaptive spectrum.

41

42

## 43 Introduction

44 Small molecules represent one of the most ancient and abundant groups of regulators spread in  
45 all branches of life. Presumably, appearing as metabolites of structural and energy-carrying molecules,  
46 many of those underwent long evolution diversifying their roles in nature. Serotonin (5-  
47 hydroxytryptamine, 5-HT) is one of those ubiquitously-spread regulatory small molecules. Indeed, 5-HT  
48 is a well-recognized component of many ancient and archetypical signaling systems widely distributed  
49 among all major phyla [1].

50 In vertebrates, 5-HT serves as a classical neurotransmitter and a hormone playing a key role in  
51 diverse cellular and physiological processes such as memory formation, feeding, social and reproductive  
52 behavior, smooth muscle contraction, ciliary motility, blood coagulation and many others [2].

53 5-HT is synthesized from tryptophan and requires two enzymes that must act sequentially: the  
54 rate-limiting enzyme tryptophan hydroxylase (TPH) followed by aromatic L-amino acid decarboxylase  
55 (AADC). The teleost fish, a popular model system for investigating the serotonergic system, has two  
56 genes of TPH, two genes of 5-HT membrane transporter (SERT) and one gene of monoamine oxidase  
57 (MAO). MAO is responsible for 5-HT catabolism that also serves as a source of reactive oxygen species  
58 implicated in cell signaling [3]. There are exceptions to the rule and some teleost fish, for instance,  
59 zebrafish and medaka, have three forms of TPH (*tph1a*, *tph1b* and *tph2*). In addition, tyrosine  
60 hydroxylase (TH2) can also synthesize 5-HT in zebrafish [4]. Concentration of 5-HT inside of a cell may  
61 rely on a speed of SERT-mediated 5-HT re-uptake, which is  $K^+/Na^+$ -dependent and can be controlled by  
62 phosphorylation, NO-synthase and integrin coupling [5–7]. Importantly, some 5-HT-dependent  
63 regulations are based on serotonylation - a covalent binding of 5-HT molecule to a target protein by  
64 transglutaminase [8], which renders intracellular localization and local concentration of 5-HT an  
65 important parameters. Most of the 5-HT effects are implemented through a number of membrane-  
66 bound receptors that are subdivided into seven main families. Numerous genes of these 5-HT receptors  
67 are duplicated in teleost fishes, which led to diversification of their functions as compared to their  
68 homologs in other vertebrates [9].

69 Remarkably, even the organisms lacking nervous system such as bacteria, protists, plants, and  
70 some multicellular animals are also capable of producing and using 5-HT. In line with this, all animals  
71 with nervous system, where serotonergic system was investigated in the past, revealed the presence of  
72 5-HT in oocytes, cleaving blastomeres and early pre-neural developmental stages, where the role of 5-  
73 HT is not directly related to the nervous system development and is currently poorly understood. When  
74 it comes to diverse and enigmatic functions of the early pre-neural serotonin, it appeared that 5-HT can  
75 stimulate or block maturation of oocytes as well as it can take part in the re-initiation of meiosis in a  
76 number of animals [10–12]. Mutations in 5-HT synthesis genes in *Drosophila* result in malformations of  
77 embryonic cuticle and can also lead to death of an embryo during pre-neural stages [13]. In addition,  
78 application of specific antagonists of 5-HT receptors leads to a complete block or, at least, a significant  
79 slowdown of cleavage divisions in nudibranch mollusk and sea urchin embryos [14,15]. In a freshwater  
80 gastropod snail *Lymnaea stagnalis*, the increase of 5-HT levels at early cleavage stage results in later  
81 disruption of gastrulation [16]. In amphibians and birds, 5-HT and its proper distribution within a  
82 cleaving embryo is an important condition for the left-right polarity-establishing mechanism [17–20].  
83 Finally, early pre-neural embryos of the teleost fish show the clear presence of 5-HT, while the role of  
84 serotonin at such early stages was not sufficiently investigated [21,22]. In line with this, 5-HT receptors  
85 HTR1aa, 1ab, 1b, 2a and 5a, turned out to be expressed in a zebrafish cleaving and gastrulating embryos  
86 [23]. At later, neural developmental stages, 5-HT signaling is involved in pharyngeal arch morphogenesis  
87 in zebrafish [21], *Xenopus* [24] and mice [25]. In the nervous system of teleost fish and mammals, 5-HT  
88 promotes developmental [26,27] and adult neurogenesis [28]. Depletion of 5-HT in zebrafish larvae

89 affects locomotor behavior as well as the body length and notochordal morphology [29]. Thus, all  
90 findings mentioned above suggest that 5-HT is an important integrative regulator of a fish development  
91 combining traits that are common with other vertebrates.

92 Notably, serotonin clearly participates in a variety of reproductive functions in the adult fish  
93 including the control of gonadotropin-releasing hormone, gonadotropin and luteinizing hormone  
94 release, gonadal maturation, and socio-sexual behavior [30]. More generally, 5-HT has been identified as  
95 an important regulator of fish female gonadal function [31–34] and a modulator of the effects of  
96 melatonin on steroid-induced oocyte maturation [35]. Furthermore, 5-HT is known as an important  
97 neuro-endocrine regulator of sexual plasticity [36], and the increased serotonergic signaling can prevent  
98 sex change in the saddleback wrasse in socially permissive conditions [37]. Such specific involvement in  
99 reproduction, maturation of gonads and production of oocytes together with the presence at early pre-  
100 neural embryonic stages suggests that the mother-derived serotonin can influence some aspects of  
101 embryonic development and, through this, can transmit non-genetic information from parents to  
102 progeny. Recently, we revealed such a case – a novel role of serotonin in a gastropod mollusk  
103 development, behavior and ecology, where 5-HT mediated non-genetic information transmission based  
104 on serotonin production in the reproductive tract of a mother snail [38]. This mother-derived 5-HT  
105 influenced the development of the snail embryo and caused delayed behavioral effects in juvenile  
106 individuals.

107 In this study, we tested the possible evolutionary-conserved information-transmitting role of  
108 pre-neural serotonin in a vertebrate teleost model system using zebrafish in a number of  
109 pharmacologic, embryologic and behavioral experiments. As a result, we demonstrated that early pre-  
110 neural 5-HT influences the later stages of neural development in a systemic way, and also leaves a  
111 footprint on the behavior of juvenile fish larvae, thus, making this mechanism of 5-HT-based adaptive  
112 information transfer possible in nature.

113

## 114 **Results**

### 115 **1. Pre-nervous serotonergic system in zebrafish is in place and active**

116 To investigate pre-nervous serotonergic system, we firstly analyzed the presence and  
117 distribution of 5-HT by immunohistochemistry (Fig. 1A-H). Serotonin itself was expressed at all  
118 developmental stages analysed (from 2-cell to 50% epiboly). We found that 5-HT was present in the  
119 early zebrafish embryos mostly in a blastodisc and later in a blastoderm, being equally distributed both  
120 in a cytoplasm of each cell and between blastomers without any significant gradients (Fig. 1 A-C, F-H).  
121 Brightness of anti-5-HT staining, and thus expression, compared to the cytoplasm was higher in the  
122 nuclei of some cells (Fig. 1C). Most of the staining showed distinct punctate pattern corresponding to  
123 small cytoplasmic vesicle-like structures 300-700 nm in diameter in blastoderm, blastodisc and in  
124 periblast, but not in yolk (Fig. 1D, E). After the formation of a periblast, 5-HT was present there in the  
125 same concentration as compared to the nearby cells, while forming a sharp drop in expression at the  
126 border with yolk (Fig. 1D, G).

127 Expression of different components of serotonergic system, including enzymes of 5-HT synthesis  
128 and degradation, 5-HT membrane and vesicle transporters was addressed by PCR at subsequent  
129 developmental stages of zebrafish. *Tph1b* (tryptophan hydroxylase 1b), *serta* (*slc6a4a*, serotonin  
130 transporter *SERTa*), *vmat* (*slc18a2*, vesicular monoamine transporter) and *maoa* (monoamine oxidase a)  
131 appeared to be expressed at pre-nervous stages of 4-8 blastomeres, 32-64 blastomeres, blastula, 30%  
132 epiboly, germ shield stage and 4dpf (Fig. 1I). Expression of *tph1a* (tryptophan hydroxylase 1a) was  
133 detected at aforementioned stages while expression of *tph2* (tryptophan hydroxylase 2) and *sertb*  
134 (*slc6a4b*, serotonin transporter b) was clearly observed only from blastula stage and onwards (Fig. 1I).

135 In addition to direct PCR we analyzed zebrafish and human developmental transcriptomics data  
136 obtained from independent studies [39,40]. We found an evident gene cluster containing transcripts  
137 related to 5-HT and its derivative melatonin that demonstrated the expression maxima specifically at  
138 pre-neural stages of zebrafish development. This cluster of genes included transcripts essential for the  
139 synthesis of these compounds, their catabolism, transport, receptors and some downstream genes (Fig.  
140 S1A). This notion was found to be conserved in other vertebrates including humans (Fig. S1B).

141 To investigate the activity of serotonin synthesis system we performed functional tests based on  
142 the incubation of zebrafish embryos at 16-32 blastomeres, 64-128 blastomeres, blastula and germ shield  
143 stages in biochemical precursors of 5-HT. Incubation of embryos at all aforementioned stages in L-  
144 tryptophan and 5-hydroxytryptophan resulted in a statistically significant increase in brightness of anti-5-  
145 HT staining (Fig. 1L, M; Fig. S2A, C-F). On the contrary, intensity of staining in yolk did not show  
146 significant changes in response to pre-incubation in those compounds at all analyzed stages (Fig. S2B).  
147 Interestingly, pharmacological blockade of both key synthesis enzymes did not result in a drop of the 5-  
148 HT level. At the same time, incubation of early embryos in 5-HT biochemical precursors with the  
149 simultaneous 5-HT synthesis blockade, resulted in lower 5-HT levels compared to when embryos were  
150 incubated only in biochemical precursors (Fig. 1N, O).

151 Both uptake and efflux of 5-HT are active processes that play an important role in maintaining  
152 proper balance of 5-HT concentration in the developing embryo. To address the uptake of serotonin at  
153 pre-nervous stages we firstly incubated teleost embryos in solutions with a range of 5-HT  
154 concentrations. We identified that all cells in cleaving and gastrulating embryos, could efficiently uptake  
155 5-HT in a concentration-dependent mode (Fig. 1N, O; Fig. S2A-G). In case of blastula, after the 5-HT  
156 uptake, the gradient of 5-HT formed between the outer and the inner cell “layers” of the blastoderm  
157 (Fig. 1J). As expected, SSRIs could decrease the 5-HT uptake, whereas none of these compounds  
158 significantly influenced natural 5-HT levels (Fig. 1N). Treatment with reserpine, a VMAT inhibitor,  
159 decreased 5-HT levels via allowing cytoplasmic vesicles to release 5-HT (where it is catabolized by MAO)  
160 while blocking the re-loading of the vesicles with 5-HT via VMAT action (Fig. 1K, O). The effect of  
161 injection of reserpine was similar to the effect of incubation of embryos with reserpine solution.  
162 Reserpine treatment also decreased 5-HT level in case of a co-incubation of embryos with 5-HT (Fig. 1K).

163 In order to assay intracellular transport of 5-HT and the effects of disturbing 5-HT distribution in  
164 embryo, we injected 5-HT into yolk and blastomeres. After the injections of 5-HT into the yolk from  
165 zygote to 32-cell stage, 5-HT efficiently moved into the cytoplasm of blastomeres. Administered 5-HT  
166 left only slight traces in the yolk already after 5 min post-injection (Fig. 1P, S<sub>1</sub>-S<sub>2</sub>) and absolutely no  
167 traces were observed in 15 min and later (Fig. 1T<sub>1</sub>-U<sub>2</sub>). At the same time, the co-injected TRITC-dextran  
168 (10 KDa) was also distributed evenly from zygote to 16-cell-stage but formed a lasting gradient in  
169 between cells in case of being applied at 32-64-cell stages (Fig. 1Q, V<sub>1</sub>-V<sub>3</sub>). Also no 5-HT gradient was  
170 formed in case of 5-HT injections into separate blastomeres at least up to 32 cell-stage. 5-HT staining  
171 was equalized between blastomeres already in 10 min after injection (data not shown). At a later  
172 timepoint, after the injection into a yolk cell at a blastula stage, most 5-HT stayed in the periblast. A  
173 weak gradient of 5-HT formed in nearby cells, but it was quickly dissolved in a layer of 10-15 cells (Fig.  
174 1R, W<sub>1</sub>-W<sub>3</sub>). When the injection of 5-HT was made into a zygote, increased anti-5-HT staining brightness  
175 was retained in an embryo and could be detected with immunohistochemistry at least up to 32 hpf (Fig.  
176 S2I).

## 177 **2. Early pre-nervous serotonergic system modulation causes delayed effects in larvae**

178 We firstly investigated larvae at 1, 2 and 4 dpf after anti-5-HT immunostaining. At 1 dpf larvae  
179 injected with 5-HT into zygote demonstrated increased levels of 5-HT immunoreactivity in all tissues and  
180 even in the lumen of the neural tube. However, we could not identify 5-HT positive neurons in the brain  
181 and neural tube from these injected animals as compared to the non-injected controls (Fig. 2A<sub>1</sub>-A<sub>4</sub>, C<sub>1</sub>-

182 C<sub>4</sub>). In line with this, in these experimental animals, anti-5-HT staining in the serotonergic sensory cells in  
183 the skin was poorly contrasted. When we checked the 2 dpf larvae injected at zygote, we consistently  
184 observed the reduced contrast of 5-HT staining in serotonergic neurons of hypothalamus, anterior and  
185 inferior raphe, arrowhead population and pineal gland (Fig. 2H<sub>1</sub>-I, O-T). At 4 dpf, 5-HT immunostaining in  
186 the CNS of treated embryos did not differ from controls. Importantly, the 1-2 dpf larvae injected with 5-  
187 HT at blastula stage (contrary to the injection at zygote stage) did not show any differences to control  
188 embryos in staining of serotonergic cells while could demonstrate some elevation of 5-HT level in some  
189 tissues (mostly in trunk; Fig. 2D<sub>1</sub>-G).

190 In order to obtain positive control, we incubated embryos in 5-HT precursor 5-HTP at early  
191 neuronal developmental stages (between 1 and 2 dpf). Later (2 dpf and beyond) these larvae  
192 demonstrated generally elevated levels of 5-HT in numerous tissues as well as in serotonergic neurons  
193 located in CNS. While all serotonergic elements persisted well distinguishable in staining (Fig. 2K<sub>1</sub>-K<sub>2</sub>).

194 Contrary of the experiments with 5-HT level exogenous elevation, both incubation and injections  
195 of reserpine into a zygote did not influence the level and localization of 5-HT at 1-4 dpf (Fig. 2B<sub>1</sub>-B<sub>4</sub>, J<sub>1</sub>-J<sub>2</sub>,  
196 O-T). On the contrary, incubation in reserpine at 1-2 dpf drastically decreased the level of 5-HT in all  
197 tissues (Fig. 2L<sub>1</sub>-L<sub>2</sub>).

198 Despite all direct manipulations with 5-HT levels in cleaving embryos, the general morphology of  
199 larvae was not affected notably (Fig. S3A). Since 5-HT depletion is known to affect growth of larvae [29]  
200 we assayed rostro-caudal length and head-to-body length proportion in larvae at 2 and 4 dpf after  
201 incubation in 5-HT and other substances from zygote to epiboly stage (Fig. S3B-F). We did not detect  
202 changes in length of the experimental fish after 5-HT (Fig. S3A) although some drifts of body proportions  
203 were noticeable. In case of reserpine incubations, experimental fish turned out to be shorter without  
204 body proportion change. The strongest effects on the fish morphology were observed after the  
205 incubations in the blocker of the 2<sup>nd</sup> stage of 5-HT synthesis NSD-1015 and tryptophan. NSD-1015 and  
206 pCPA influenced the proportions of the head and the rest of the body, while tryptophan made fish  
207 proportionally shorter (scaling down the general size). In all these cases, the effects were rather minor  
208 but significant in case of 3-4 repetitions and large numbers of fishes analyzed (Fig. S3C-E).

209 In addition to the general morphology and growth, we analyzed possible left-right asymmetry  
210 anomalies by looking at cardiac morphology after incubation in blockers of 5-HT synthesis, reserpine,  
211 number of SSRIs and antagonist of 5-HT<sub>4</sub> receptors GR-113808, which is known to affect normal left-  
212 right asymmetry in *Xenopus* embryos being applied at early developmental stages [18]. We did not  
213 observe any significant differences between experimental and control groups (Fig. S4B).

214 Furthermore, we did not find any visible disturbances of early development in the fish incubated  
215 between zygote- and 50% epiboly-stage in a number of known serotonergic system modulators we  
216 tested. Namely, antagonists of 5-HT receptors (1-100 μM): methiothepin, mianserin, metoclopramide,  
217 NAN-190, trazodone, ritanserin, SB 203186, SB 269970, spiperone, (S)-WAY100135, tropanil, zolopride;  
218 5-HT receptor agonists (1-100 μM): 5-CT, 5-MeO-DMT, 8-OH-DPAT, alpha-methylserotonin, Br-LSD, DOI,  
219 mCPP; 5-HT transporter blockers (1-100 μM): fluoxetine, citalopram, fluvoxamine, imipramine,  
220 clomipramine. Blockers of the transglutaminase-mediated serotonylation MDC (100 μM) and cystamine  
221 (1 mM) also did not affect early development of fish.

### 222 ***3. Modulation of serotonin level at the early stages affects content of monoamines and their*** 223 ***metabolites in larvae***

224 In order to perform direct measurements of monoamines and their metabolites, we utilized a  
225 highly sensitive HPLC-based approach that allowed us to perform investigations at the level of individual  
226 fish embryos or larvae (or their separated heads) (Fig. 3A, S5A). The whole-body analysis showed that 2  
227 dpf larvae injected with 5-HT at zygote stage demonstrate significant general elevation of 5-HT and its

228 major metabolite 5-HIAA (Fig. 3B, E, H-I). At the same time, the proportion of 5-HIAA and 5-HT did not  
229 differ from control in the case of whole-body measurements. However, if heads were analyzed  
230 separately from the body, we detected differences in the proportion of 5-HT and its metabolite: the  
231 level of 5-HT did not differ significantly from control larval heads, while 5-HIAA levels turned out to be  
232 1.5-fold lower than a norm. However, at 6 dpf the experimental fish heads showed similar 5-HT and 5-  
233 HIAA levels as compared to controls (Fig. 3D, F). Incubation of 1-2 dpf larvae in 5-HTP significantly  
234 increased the levels of 5-HT in the heads of 2 dpf larvae, while 5-HIAA was slightly (non-significant)  
235 increased (Fig. 3C, F). These experimental fish maintained the differences in 5-HT (non-significant  
236 elevation) and 5-HIAA (significant elevation) even at 6 dpf (Fig. 3D, F). Injections of reserpine into a  
237 zygote caused a small but significant elevation of 5-HT in the head at 2dpf larvae. Incubation of 1-2 dpf  
238 larvae in reserpine led to a cardinal reduction of all monoamines and also shifted  
239 metabolite/monoamine ratio towards metabolites (Fig. 3C-D, G).

240 Since behavioral effects of 5-HT metabolism changes in brain are often promoted through the  
241 coordinated reflection in other monoamine systems, catecholamines noradrenaline (NA), dopamine  
242 (DA) and its metabolites DOPAC and HVA were also taken into analysis (Fig. S5B). DA and its main  
243 metabolite DOPAC level was increased in the heads of 2 dpf fish subjected to the elevation of 5-HT both  
244 at zygote and 1-2 dpf (through the application of 5-HTP) stages. By 6 dpf these differences disappeared.  
245 NA was affected only by later but not early increase of 5-HT. It was higher than in control in 2 dpf and  
246 lower in 6 dpf. DOPAC unlike HVA was touched in both variants of experiment with 5-HT increase.

247 Taken together, changes in monoamines and their metabolites differ in the head and whole  
248 body of fish. Principal components analysis reveals that changes in measured substances level after the  
249 injection of 5-HT into a zygote are different (and often opposite) from the changes in experimental fish  
250 incubated with 5-HTP at neural 1-2 dpf stages. Accordingly, incubation in reserpine at 1-2 dpf caused  
251 different effects on the concentration of serotonin and catecholamines as compared to the effects  
252 resulting from the injection of reserpine into a zygote. Generally, the effects of 5-HT injected at a zygote  
253 stage on later monoamine concentrations were almost undetectable at 6 dpf. On the other hand, the  
254 effects of incubation in 5-HTP at 1-2 dpf remained pronounced at 6 dpf (Fig. 3J-N).

#### 255 ***4. Larval behavior is affected by increase rather than decrease of 5-HT in the early pre-nervous*** 256 ***embryos***

257 Disturbances in the level of 5-HT or catecholamines have been shown to cause specific changes  
258 in larval behavior of zebrafish [41]. In order to confirm our observation on early 5-HT action we  
259 performed number of behavior tests on 1 dpf – 6 dpf old fish (see scheme at Fig. 4A).

260 We firstly found that elevation of 5-HT at early pre-nervous stages led to an increase in the  
261 frequency of coiling (spontaneous trunk contractions) in 1 dpf embryos. Pharmacological compounds  
262 enhancing synaptic 5-HT signaling (reserpine and SSRIs) also influenced this parameter (Fig. 4B). Startle  
263 response to touch test at 4 dpf revealed no significant differences to control in fish that were injected  
264 with 5-HT during a zygote stage. Similarly, we found no effects in either spontaneous swimming or  
265 startle response to acoustic stimulation at 5-6 dpf (Fig. 4F-H, S6A-B).

266 In contrast, larvae incubated in 5-HTP at 1-2 dpf demonstrated higher activity in a touch  
267 response test at 4 dpf (Fig. 4C) and reduced spontaneous activity at 6 dpf (Fig. 4E). At the same time, in  
268 these fish we did not find any differences compared to the control in the frequency of coiling (1 dpf),  
269 spontaneous swimming and acoustic startle response at 5 dpf (Fig. 4B, C-H). Thus, the effects of 5-HT  
270 level increase through the application of 5-HTP between 1 and 2 dpf differ from the effects resulting  
271 from 5-HT increase at pre-neural stages.

272 Decreasing 5-HT level at cleavage stages by reserpine injection into the zygote did not induce  
273 significant effects in any tests we have assayed (Fig. 4C-H). In contrast, reserpine application at 1-2 dpf  
274 significantly reduced all types of larval behavioral activities (Fig. 4C-H).

275 We next assessed the habituation to repetitive tactile (2-4 dpf) or acoustic (5-6 dpf) stimulation  
276 by measuring the proportion of larvae responding to sequential stimulus application. Larvae injected  
277 with 5-HT at a zygote stage demonstrated significant differences from control at 4-6 dpf in both  
278 aforementioned tests (Fig. 4I-M). We observed significant differences in the speed of decline in  
279 response to repetitive stimulations (Span and K – Fig. 4N, O, P), as well as in the minimal proportion of  
280 responding fish (Plateau, Fig. 4N, Q). The differences in response to stimulation appeared to be larger at  
281 6 dpf than at 2 dpf.

282 Serotonergic anterior raphe neurons in zebrafish are known to be implicated in the arousal and  
283 behavioral reactions to dark-light cycling [42] we decided to expose larvae to dark-light pulse test. The  
284 larvae were subjected to 10 min of complete darkness. Swimming activity was recorded continuously  
285 starting 10 min before the dark pulse, and for 10 min after the end of the dark pulse (Fig. S6C). The  
286 response to sudden dark onset is a complex behavioral reaction that involves multiple signaling systems,  
287 which eventually result in an abrupt increase in activity (about 1s), followed by sustained hyperactivity  
288 (Fig. S6C-D). Although the shape of the response appears similar (Fig. S6C, H, J), the larvae injected with  
289 5-HT display a small but significant reduction in the initial response (Fig. S6I-J), hyperactivity decline in  
290 the darkness (Fig. S6C, H) and increased activity after light is switched on again (Fig. S6C, E, J-K).

291 In summary, our results revealed that the effect of a zygotic injection of 5-HT at zygote stage  
292 and incubation with fluoxetine at 4-5 dpf had similar effects. But expression level of the treatment's  
293 behavioral effect in case of 5-HT administration to zygote was much milder than hyperserotonergic  
294 phenotype resulted from SSRI treatment at 4-5 dpf. Incubation in fluoxetine at 4-5dpf significantly  
295 enhanced the effects of zygotic 5-HT injection (Fig. 4I-L; Fig. S6G, H, G-H). However, some parameters  
296 and reactions did not sum up (Fig. 4D, F-G; Fig. S6A-C, J). That indicates complexity of the effect and  
297 some differences to classical serotonin syndrome caused by SSRIs.

## 298 ***5. Exogenous elevation but not reduction of 5-HT in cleaving embryos induces systemic changes in the*** 299 ***transcriptome of the developing zebrafish larva***

300 Transcriptomic analysis in response to 5-HT increase and decrease at zygote stage was  
301 performed at 2 and 4 dpf in two replicates with control. The overall effect of 5-HT moderation on  
302 transcriptome was relatively modest compared to the control experiment: 2.5% of all probesets  
303 changed their expression more than two-fold in 2 dpf, and 1.3% of all probesets had more than two-fold  
304 change at 4 dpf, and only 0.2% of all probesets changed their expression more than 4-fold at 2 or 4 dpf  
305 compared to the control (Fig. 5B). Effect of 5-HT decrease by early reserpine injection was very  
306 moderate unlike to increase (Fig. 5C).

307 In order to functionally characterize the effect of the serotonin and distinguish it from the  
308 transcriptome changes caused by development course itself, we considered three log ratios for the  
309 analysis: relative to control effect of 5-HT at 2 dpf (HT2), relative to control effect of 5-HT at 4 dpf (HT4),  
310 relative difference of gene expression in control experiments between 4 and 2 dpf (DAY\_CONTROL). We  
311 observed striking negative dependence between normalized responses to serotonin in 4 and 2 dpf (Fig  
312 5B). The difference in response to 5-HT elevation between 4 and 2 dpf was specific and not redundant  
313 with changes between days in control experiments (Fig 5D). We have not observed this effect for  
314 reserpine experiment, where the amplitude of the response was much smaller and did not show  
315 significant correlation between 2 and 4 dpf (Fig 5C, E). See the data for all probesets and recognized  
316 genes in the tab All probesets in Supplementary File 1.

317 Clustering analysis of 1000 most variable genes across all conditions revealed 4 major groups of  
318 genes (Fig. 5F, G): positive or negative 5-HT effect and positive or negative day effect. Importantly, the  
319 response to reserpine was substantially weaker and at the same time opposite to the response to 5-HT  
320 for the majority of genes in these identified groups where the input into the dispersion of response to  
321 the compound was higher as compared to the input into the dispersion of the day effect (Fig. 5F).

322 According to the results of clustering analysis and PCA, the embryos injected with reserpine took an  
323 intermediate position between controls and embryos injected with 5-HT (Fig. 5H-I).

324 In order to validate microarray transcriptomics data on bulk RNA probes isolated from control  
325 and 5-HT-injected embryos, we selected a number of genes with different 5-HT scores and all-effects  
326 variance. qPCR assay confirmed that for the majority of these genes, the direction of their change and  
327 the order of their response correspond to the microarray data (Fig. 5J-L).

328 After ranking the genes according to their relative expression between the two days (HT4-HT2),  
329 we checked for the functional enrichment of zebrafish Gene Ontologies in the resulted ranking, using  
330 Gene Set Enrichment Analysis (GSEA). In the negative part of the ranking, we observed significant  
331 enrichment (corrected  $p$ -value $<0.05$ ) of several functional categories of genes related to the small  
332 GTPases: such as GO:0005083, SMALL GTPASE REGULATOR ACTIVITY (with *wasb*, *cdc42bpb*, *mink1* in  
333 the top ranked genes in the core enrichment), GO:0051056, REGULATION OF SMALL GTPASE MEDIATED  
334 SIGNAL TRANSDUCTION (*sos2*, *rgl3a*, *tsc2*, *rgl2* genes) and GO:0005452, INORGANIC ANION EXCHANGER  
335 ACTIVITY (with *slc4* gene family in the top contributing genes) (See Supplementary File 1). These  
336 functional categories are upregulated compared to the control in day 2, and become relatively  
337 downregulated in day 4. The positive part of the ranking shows the opposite trend (downregulation in 2  
338 dpf and upregulation in 4 dpf). In this part, we observed enrichment in diverse functional categories)  
339 such as GO:0006457, PROTEIN FOLDING (*cwc27*, *sec63*, *vbp1*, *ppiab*, *uri1*, *dnajb11*, *fkbp9* in the top  
340 genes), GO:0016874, LIGASE ACTIVITY (*ube2g1b*, *adssl*, *traf6*, *ube2na*, *arih1l*, *arih1*, *ube2a*) and  
341 GO:0006184, GTP CATABOLIC PROCESS (*rab2a*, *ralba*, *rhead*, *nras*). The detailed results of GSEA analysis  
342 are provided in the tab GSEA in Supplementary File 1.

343 In addition, we used ZEOGS tool for GO term analysis with a focus on anatomical categorization  
344 [43] which showed that for 2-4 dpf CNS was the most prominent GO term (tegmentum, CNS, cranial  
345 ganglion, hidbrain, forebrain, spinal cord and other). Also, the effect of 5-HT was apparent among the  
346 genes associated with peripheral sensory structures, cardiovascular and excretory systems. These  
347 effects were the most stable among nervous and excretory systems (Fig. 6A-E). See the full list of  
348 anatomical GO terms in the tab Anatomical GO Terms in Supplementary File 1.

349 Meta-analysis of GO term lists categorized according to the biological processes revealed  
350 membrane transport and ion homeostasis as the most robust groups. GO terms focused on the cellular  
351 structure showed the potential importance of a cell membrane as well as adhesive and cell-substrate  
352 junctions (Fig. 6F-H).

353 Next, we analyzed the potential reactome. Using OFTEN analysis tool, we found that the genes  
354 from the 5-HT score list formed a statistically significant network (Fig. 6I) with robust guanine-binding,  
355 RHOC-related and b-catenin-related subnets (Fig. S7). Among main hubs of reactome network we found  
356 such an important for the process of development genes as *cdc42*, *rac1*, *egr1* *mapk14* and *ctnnb1*.  
357 Application of analysis based on REACTOME pathway database [44] (zebrafish subset) revealed the  
358 highest score amongst the predicted networks connected with Rho, p38 and non-canonical Wnt  
359 signaling (Fig. 6J).

360 Next, we applied network-based analysis of top HT4-HT2 genes using REACTOME pathway  
361 database [44] (zebrafish subset). Using OFTEN analysis tool [45], we found that the first 300 genes from  
362 the 5-HT score list formed a statistically significant connected network (Fig. 6I, J). The set of genes  
363 connected in this network was enriched with Rho, p38 and non-canonical Wnt signaling pathways (Fig.  
364 6J). Among main hubs of the network we found such an important for the process of development  
365 genes as *cdc42*, *rac1*, *egr1*, *mapk14* and *ctnnb1*. Similar analysis using HPRD protein interaction network  
366 [46] also highlighted guanine-binding, RHOC-related and b-catenin-related subnetworks (Fig. S7).

## 367 Discussion



368 The enigma of pre-neural serotonin and its role during early stages of embryonic development  
369 in different invertebrate animals inspired us to investigate its role in early pre-neural vertebrate  
370 development. Our previous work on the invertebrate model of *Lymnaea stagnalis* revealed that increase  
371 of 5-HT exclusively during early pre-neural developmental stages affects later developmental aspects  
372 and behavior of juvenile snails [38]. This study clearly suggested that mother-derived serotonin affects  
373 the lifestyle of progeny in a delayed and non-genetic manner. To investigate whether this holds true for  
374 vertebrates as well, we used zebrafish embryos and larvae to address the role of pre-neural serotonin.  
375 We found that increase rather than decrease of 5-HT level in zygotes and early cleaving embryos results  
376 in conceptually-similar delayed effects in juvenile and adult individuals.

377 We firstly analyzed the development of serotonergic system starting from a zygote stage.  
378 Consistently with earlier studies, we detected the presence of serotonin [21,22] as well as some  
379 receptors and AADC in cleaving embryos of teleost fish [23,47]. Our experiments demonstrated that pre-  
380 neural zebrafish embryos synthesize and capture 5-HT from the environment, and that this 5-HT is  
381 anisotropically distributed, being mostly present in a cleaving part of an embryo. Some earlier studies  
382 suggested that differential distribution of 5-HT in cleaving blastomeres may play the role of an  
383 instructive morphogenetic gradient [48]. However, unlike the situation in *Xenopus* [18], 5-HT did show  
384 any signs of a gradient in blastomeres of zebrafish. Moreover, when we experimentally created such a  
385 gradient, no major developmental processes were affected.

386 The presence of a multicomponent and complex serotonergic system at early pre-neural  
387 developmental stages suggested the importance of serotonin for key developmental transitions in fish.  
388 However, the pharmacological screen with a number of serotonergic system-related drugs did not  
389 reveal any disturbances in cleavage, gastrulation and other developmental processes, even in those that  
390 were previously reported to be affected in similar experimental settings in annelid worms [49], mollusks  
391 [14,16,38], insects [13], sea urchins [15], ascidians [50], amphibians [51] and mammals [52,53].  
392 Importantly, we did not detect any abnormalities in left-right asymmetry development, which has been  
393 shown to be the case when serotonergic system was affected in amphibians and birds [17,18]. Overall,  
394 the early development of teleost fish turned out to be surprisingly stable and quite insensitive to the  
395 modulation of early serotonergic system. At the same time, multiple components of serotonergic  
396 system are present at early developmental stages of a fish and are conservative, rendering this aspect as  
397 highly similar to other vertebrate and invertebrate groups of animals. Thus, the pre-neural early  
398 developmental serotonin might play some other subtle roles, for instance, controlling delayed or mild  
399 effects operating in mid-, late- and post-embryonic development. To address such delayed effects of  
400 serotonin, we performed experiments with modulations of pre-neural embryonic 5-HT followed by the  
401 analysis of larval serotonergic system together with behavioral tests, morphology of larval body and  
402 measurements of monoamines and their metabolites. As a result, we did not detect any significant  
403 morphologic abnormalities in fish larvae that developed from the early-manipulated embryos.  
404 Unexpectedly, juvenile fish with modulated early pre-neural serotonergic system demonstrated subtle  
405 but significant changes in their behavior. These effects were restricted to the early pre-neural stage  
406 treatments, since disturbances of serotonergic system at any later time point, including stages of neural  
407 development, could not recapitulate the early stage-treatment effects. Thus, the early stage effects  
408 cannot be based on retained and stored serotonin. In nature, such mechanisms may play a potent  
409 adaptive role. For instance, the serotonin from the mother or from the immediate environment, where  
410 embryos develop, may define the fine aspects of young fish lifestyle.

411 These results reveal different roles of pre-neural and neural serotonin and suggest a new  
412 explanatory framework that clarifies some logical incongruence found in previously published data. For  
413 instance, previous studies demonstrated that experimental reduction of 5-HT achieved by blocking the  
414 TPH activity, or, alternatively, performing a gene knock out or inducing a pharmacological inhibition of  
415 AADC at 1-4 dpf, suppress fish movements with minor further recovery [29,47]. On the other hand, the

416 elevation of 5-HT in fish results in some paradoxical effects. For instance, direct injection of 5-HT into  
417 the pericardium of 4 dpf larva leads to the increased locomotor activity [54], whereas the increase of 5-  
418 HT levels by inhibition of MAO from zygote to 5-7 dpf results in hypolocomotion of zebrafish larvae [55].  
419 Furthermore, Sallinen et al. revealed that both general level of 5-HT and local content in specific tissues  
420 in such fish are significantly augmented. This hyperserotonergic phenotype in larvae after MAO inhibition  
421 included noticeable decrease of 5-HT immunoreactivity in the serotonergic cell soma in the brain [55]. In  
422 our study, we found the similar reduction of anti-5-HT staining at 2 dpf achieved by the elevation of 5-  
423 HT level starting earlier at zygote stage. Another type of hyperserotonergic phenotype characterized by  
424 hypolocomotion is observed in case of blocking SERT, and the decrease in swimming activity appears in  
425 case of incubation in SSRI only starting from 3 dpf. At the same time, drug administration between 10  
426 and 72 hpf causes no alteration in locomotion [56]. Hence, all these contradictions can be explained by  
427 our concept of different action and role played by early pre-neural versus late serotonin during fish  
428 development. Indeed, the gene expression analysis showed that injection of 5-HT in zygote causes wide  
429 changes that show a trend coherent with our findings showing diverging roles of serotonin at different  
430 developmental stages. Numerous genes that should be switched on at 2dpf stayed downregulated and  
431 instead were seen upregulated at 4 dpf, when they should be already downregulated as compared to  
432 the stage-matched controls. Therefore, increased zygotic serotonin delays the expression of many  
433 genes, and at the same time it also causes the premature expression of some rather late genes. In the  
434 latter case, the number of such early upregulated genes is much lower as compared to the number of  
435 genes that are delayed in their expression level.

436 Complementary to our reasoning in the previous paragraph, it is worth mentioning that the  
437 catecholaminergic system is connected with the serotonergic system in the brain. In agreement with  
438 this, both pre-neural and early neural increase of 5-HT in our experiments resulted in upregulated  
439 catecholamine's metabolism. The experiments involving MAO inhibition did not affect the content of  
440 catecholamines themselves, but led to the decrease of MAO-related dopamine metabolite DOPAC [55].  
441 Comparisons with data from the literature revealed that MAO blocking described by Sallinen et al. and  
442 application of 5-HT or 5-HTP in our experiments caused similar order of changes in 5-HT concentrations.  
443 Despite this, the effects on larval behavior were much less pronounced in case of 5-HT or 5-HTP  
444 administration. Thus, hyperserotonergic phenotype can develop also via influencing catecholaminergic  
445 system in addition to serotonergic system-mediated effects.

446 In our experiments, in addition to particular changes in larval behavior in response to the early  
447 serotonin manipulation, we observed that serotonergic neurons in 2 dpf embryos showed significantly  
448 less serotonin after 5-HT application to zygote or early cleavage stages (but not to the later stages of  
449 development). Serotonergic neurons in the dorsal root nuclei mediate short-term motor learning in  
450 zebrafish larva [57]. These neurons activation decreases acoustic startle response habituation while 5-  
451 HT depletion leads to its enhancing [58]. Similarly to Sallinen with co-authors [55], we could clearly see  
452 the reduction of 5-HT in all types of serotonergic cells as a part of hyperserotonergic phenotype. This  
453 invariably implies that 5-HT synthesis is affected in all cells where it depends on different isoforms of  
454 TPH. At the same time, the transcriptomics profiling did not reveal significant shifts in the expression of  
455 enzymes and transporters related to 5-HT metabolism and turnover, which suggests an alternative  
456 molecular mechanism.

457 One of the possible explanations might include different mechanisms of a post-translational  
458 control of TPH activity. In *Sert<sup>-/-</sup>* mice, the *in vivo* level of 5-HT synthesis is upregulated without changes  
459 in expression and *in vitro* activity of both TPH isoforms [59]. The mechanisms of such control can include  
460 phosphorylation of TPH, synthesis and regeneration of tetrahydrobiopterin coenzyme, changes in iron  
461 metabolism or inactivation of TPH by reactive oxygen species [60]. Unexpectedly, 5-HT and its  
462 metabolite 5-HIAA showed different levels in the head and the rest of the body of advanced larvae after  
463 5-HT administration into a zygote. Therefore, we observed a conceptual difference between metabolism

464 of 5-HT in a head and in the rest of the body in response to the early pre-neural increase of 5-HT  
465 concentration. The subtle difference between the results of anti-5-HT IHC staining and direct  
466 measurements based on HPLC might be explained by masking of intracellular decrease of 5-HT with  
467 increased level of 5-HT in blood and intercellular spaces. Additionally, in the brain, local 5-HT synthesis  
468 and degradation might be regulated by inhibitory neuronal feedback loops [61]. Our results suggest that  
469 such regulation may exist not only within neurons but also in other cell types at different time points  
470 during development.

471 The delayed nature of effects of pre-neural serotonin is not based on the retained serotonin  
472 since we tested for this by performing later treatments. On the other hand, the observed phenomenon  
473 requires an explanation at the molecular level. In principle, the delayed effects can be transmitted  
474 through the intermediate developmental stages via the states of secondary messenger systems,  
475 retained expression of transcription factors, changes in epigenetic landscapes or post-translational  
476 modifications of proteins including their serotonylation (post-translational control of a protein function,  
477 which is based on the covalent binding of serotonin to the residues of glutamines). Serotonylation  
478 directly depends on the intracellular concentration of serotonin, and, thus, can be a convenient mean of  
479 delaying and relaying a signal in our settings. The potential role of serotonylation in 5-HT-related aspects  
480 of vertebrates development can be similar to its signal-relaying function revealed in our previous study  
481 on *Lymnaea stagnalis* [38]. However, our experiments did not support its direct involvement into the  
482 early 5-HT-related regulations in zebrafish. The reason of this may be in fact that during zebrafish  
483 development unlike in *Lymnaea stagnalis* or mammals, the oocyte size is large while the volume of the  
484 body does not increase much between a zygote and a first feeding stage. This means that 5-HT  
485 deposited into an egg by the mother or 5-HT captured from the environment would be retained, unless  
486 new synthesis or intense catabolism is involved. This might enable a fine 5-HT-dependent control at any  
487 pre-neural or neural developmental step, including delayed effects in the presence of a strong  
488 catabolism or later body growth dissolving the original concentration. Once deposited by a mother, the  
489 early pre-neural serotonin can cause the delayed effects such as affecting the formation of different  
490 populations of differentiating neurons, which, in turn, might “imprint” specific behavioral features  
491 retained for the rest of the animal’s life (Fig. 6L). In line with this, our results demonstrate that the 5-HT  
492 content in a zygote and synthesis of 5-HT in the early embryonic neurons are interlinked by a negative  
493 feedback loop. This is fully consistent with the fact that early pre-neural elevation of 5-HT causes an  
494 increase of a short-term behavioral habituation.

495 Thus, natural variation of 5-HT level in a zygote may represent one of the sources for the inter-  
496 individual behavioral plasticity. In our previous work on *L. stagnalis*, we found that 5-HT is released from  
497 the embryo to the environment [38]. Capacity of pre-neural zebrafish embryos to uptake 5-HT from the  
498 media suggests that 5-HT may additionally serve as a quorum sensing molecule mediating  
499 communication between developing embryos as well as for sensing the environment in general, which  
500 might be necessary for the formation of the adaptive behavioral diversity in juveniles and adult fish (Fig.  
501 6L).

502

503

## 504 **Materials and Methods**

### 505 **Animal maintenance and general manipulation procedures**

506 For experiments we used AB line fish kept in Karolinska Institutet zebrafish core facility. All  
507 works were performed according to Swedish laws and regulations on animal experimentation. Fish eggs  
508 were obtained by natural fertilization process with the standard procedures described before [62,63].

### 509 **Pharmacological treatments**

510 Injections of embryos were performed using Eppendorf FemtoJet microinjector. We co-injected  
511 substances with lysine-fixable TRITC-conjugated fluorescent dextran (Molecular Probes, USA). To avoid  
512 impact of differences in permeability, we dechorionated zebrafish eggs at zygote stage using proteinase  
513 K protocol [62] for the most of the pharmacological treatments.  
514 The following drugs were used for pharmacological treatment (produced by Tocris, unless otherwise  
515 specified): serotonin (5-hydroxytryptamine hydrochloride, 5-HT, Sigma-Aldrich); L-tryptophan  
516 (tryptophan, Trp, Sigma-Aldrich); 5-hydroxy-L-tryptophan (5-HTP, Sigma-Aldrich); 3-  
517 hydroxybenzilhydrazine (NSD-1015, Sigma-Aldrich); m-CPP hydrochloride (mCPP); 4-iodo-2,5-  
518 dimethoxy- $\alpha$ -methylbenzene ethanamine hydrochloride (DOI); mianserin hydrochloride (mianserin);  
519 spiperone hydrochloride (spiperone); ritanserin tartrate (ritanserin); methysergide maleate  
520 (methysergid); cyproheptadine hydrochloride (cyproheptadine); trazodone hydrochloride (trazodone,  
521 Sigma-Aldrich); ketanserin tartrate (ketanserin), citalopram hydrobromide (citalopram), clomipramine  
522 hydrochloride (clomipramine), fluoxetine hydrochloride (fluoxetine), fluvoxamine hydrochloride  
523 (fluvoxamine), imipramine hydrochloride (imipramine), cystamine dihydrochloride (cystamine, Sigma-  
524 Aldrich), monodansylcadaverin (MDC, Sigma-Aldrich), 5-carboxamidotryptamine (5-CT), 5-methoxy-N,N-  
525 dimethyltryptamine (5-MeO-DMT), 7-(Dipropylamino)-5,6,7,8-tetrahydronaphthalen-1-ol (8-OH-DPAT),  
526  $\alpha$ -Methylserotonin ( $\alpha$ MS), (6aR,9R)-5-bromo-N,Ndiethyl-7-methyl-4,6,6a,7,8,9-hexahydroindolo[4,3-  
527 fg]quinoline-9-carboxamide (Br-LSD, kindly gift of Dr. Laszlo Hiripi), tropanyl-3,5-dimethylbenzoate  
528 (tropanyl), (S)-WAY 100135 dihydrochloride (WAY-100.135), SB 269970 hydrochloride (SB269970), GR-  
529 113808, zacopride hydrochloride (zacopride), NAN-190 hydrobromide (NAN-190) all mineral salts were  
530 obtained from Sigma-Aldrich. 5-HT, 5-HTP and tryptophan solutions of specified concentrations were  
531 freshly prepared in embryo medium. All other solutions were prepared as 10 mM stocks in DMSO, d.i.  
532 water of 95% ethanol and stored at  $-20^{\circ}\text{C}$  prior to application to the embryo medium.

### 533 Immunohistochemistry, image acquisition and analysis

534 For IHC staining dechorionated embryos and larvae were fixed overnight in 4% PFA on 1x PBS.  
535 Embryos and larvae up to 2 dpf were permeabilized with 5% triton X-100 solution in PBS (overnight,  
536  $4^{\circ}\text{C}$ ). 4 dpf fish were additionally treated with proteinase K [62]. Samples were incubated in polyclonal  
537 rabbit anti-5-HT antibody (ImmunoStar, Hudson, USA, #20080, polyclonal, rabbit, dilution 1:2000) during  
538 48-72 hours at  $10^{\circ}\text{C}$ . Primary antibodies were detected with donkey-anti-rabbit Alexa 488 and Alexa 633  
539 -conjugated IgG (Molecular Probes, USA, diluted 1:800 in PBS), 8 h at  $4^{\circ}\text{C}$ . Cell nuclei were stained with  
540 DAPI or Hoechst 33342. After 3x10 min washing in PBS, the specimens were immersed in 2,2'-  
541 thiodiethanol (TDE) and placed to the glass bottom dishes for microscopic analysis and image  
542 acquisition.

543 For 5-HT level estimation, we obtained confocal images of immunostained early embryos. Scans  
544 were performed with fully open pinhole. Measurements and analysis were performed with FIJI  
545 software. Entire embryos or relevant parts were manually delineated, and average pixel intensity was  
546 obtained inside of the border in arbitrary fluorescence units (a. u.). Measurements of 5-HT level in the  
547 brain cells were done in volume basing on the full 3D scans of fish head. We manually traced each slice  
548 for the segmentation of cell volumes using Imaris software (Bitplane), then estimated mean brightness  
549 within volumes delimited by the 3D surfaces.

### 550 Measurements of monoamines and their metabolites

551 Whole fish or freshly dissected heads were homogenized at  $0^{\circ}\text{C}$  with 100  $\mu\text{l}$  of 0.2 M perchloric  
552 acid containing 100  $\mu\text{M}$  EDTA-2Na. Following standing for 30 min on ice, the homogenates are  
553 centrifuged for 5 min at 12,000 x g at  $4^{\circ}\text{C}$ . The supernatants are carefully aspirated and mixed with 1M  
554 sodium acetate buffer at a ratio 5:1 (v/v). Resulting solution was filtered through a centrifuge filter (30K  
555 PES membrane, VWR) for 7 min at 12,000 x g at  $4^{\circ}\text{C}$ . The filtrates were analyzed immediately.

556 Measurements of monoamines concentrations were performed using high pressure liquid  
557 chromatography (HPLC) with electrochemical detection as described elsewhere [64]. Briefly, the HPLC  
558 system consisted of a HTEC500 unit (Eicom, Kyoto, Japan), and a CMA/200 Refrigerated Microsampler  
559 (CMA Microdialysis, Stockholm, Sweden) equipped with a 20  $\mu$ L loop and operating at +4°C. The  
560 potential of the glassy carbon working electrode was +450 mV versus the Ag/AgCl reference electrode.  
561 The separation was achieved on a 200 x 2.0 mm Eicompak CAX column (Eicom). The mobile phase was a  
562 mixture of methanol and 0.1 M phosphate buffer (pH 6.0) (30:70, v/v) containing 20 mM potassium  
563 chloride and 0.13 mM EDTA-2Na. The chromatograms were recorded and integrated by use of a  
564 computerized data acquisition system Clarity (DataApex, Prague, Czech Republic). The detection limit  
565 (signal-to-noise ratio = 3) for NA, DA and 5-HT was 0.5 fmol in 10  $\mu$ l injected onto the column  
566 respectively.

567 Concentrations of DOPAC, HVA and 5-HIAA were determined by a separate HPLC system with  
568 electrochemical detection (HTEC500). The potential of the glassy carbon working electrode was +750  
569 mV versus the Ag/AgCl reference electrode. The separation was achieved on a 150 x 3.0 mm Eicompak  
570 SC-5ODS column (Eicom). The mobile phase was a mixture of methanol and 0.1 M citrate/0.1 M sodium  
571 acetate buffer solution (pH 3.5) (16:84, v/v) and contained 0.971 mM octanesulphonic acid sodium salt  
572 and 0.013 mM EDTA-2Na. The detection limit (signal-to-noise ratio = 3) for DOPAC, HVA and 5-HIAA was  
573 20 fmol in 10  $\mu$ l injected onto the column respectively. The chromatograms were recorded and  
574 integrated by use of the computerized data acquisition system Clarity (DataApex).

575 In order to determine number of larvae per sample essential for measurements, we built  
576 normalization dependences of concentration to fish number which showed linear character and thus  
577 concentrations were expressed in quantity of substance per fish or fish's head.

#### 578 **Behavioral tests**

579 For the analysis of spontaneous coiling activity in 1 dpf larvae we recorded 5 min footages, then  
580 manually counted the number of contraction. The response to touch was analyzed in 2-4 dpf larvae.  
581 Each larva was repeatedly stimulated by gently touching it with a needle in the trunk region. A  
582 significant response was recorded when the stimulation was followed by a displacement of at least 1  
583 body length. Each fish was stimulated ~50 times (~1 touch per second). All experiments were  
584 videorecorded and analyzed manually.

585 Behavioral assays on 5 and 6 dpf fish were performed using integrated high throughput systems  
586 for videotracking and environmental control (DanioVision, Noldus, Wageningen, Netherlands) as  
587 previously described [63]. The larvae were plated individually in 48-well plates (round wells, 10 mm in  
588 diameter) at least 1h before testing. All experiments were performed during the light phase of the  
589 diurnal cycle (light/dark 14h/10h). Spontaneous swimming was recorded under white light illumination  
590 for 5 min before the dark pulse. A sound stimulus was applied by means of a solenoid plunger hitting the  
591 base of the recording chamber. Both white light illumination and acoustic stimulation were controlled  
592 by the videotracking software and synchronized with the video recording. Swimming activity was  
593 recorded under constant infrared illumination at 50 fps and tracked in live mode. The XY coordinates  
594 were exported as ASCII files and analyzed using custom-made routines implemented in Matlab™ (The  
595 Mathworks, Natick, MD, USA).

596 The acoustic startle response was first evaluated by averaging the response to 10 consecutive  
597 stimulations applied with 1 min intervals to avoid habituation. The habituation to acoustic stimulation  
598 was assessed by decreasing the interval between stimuli to 10 s.

599 The dark pulse experiment consisted of a 10-min long interval when the light was turned off  
600 during the light phase of the dark/light cycle. Swimming activity was tracked for 10 min before, during  
601 the dark episode, and for 10 min after the turning the light back on. We analyzed the dark pulse-induced

602 hyperactivity, the gradual decline in activity level during the dark pulse and the response to turning the  
603 light back.

#### 604 **PCR and qPCR**

605 40-60 fish embryos or larvae were placed into trizol reagent and total RNA was extracted using  
606 the RNeasy Mini Kit (Qiagen). 1 µg of total RNA was treated with RQ1 Rnase-free DNase (Promega) and  
607 reverse transcribed using SuperScript II Reverse Transcriptase (Invitrogen) and random primers (RT+  
608 reaction). Parallel reactions without reverse transcriptase enzyme were performed as a control (RT-  
609 reaction), and SYBR Green I real-time quantitative PCR assays were carried out, as described in [65].  
610 Expression levels were obtained by normalization to the value of housekeeping genes, obtained for  
611 every sample in parallel assays. For the information about the primers used to obtain the results  
612 presented on Fig.1I and 5L-M, see the Supplementary Tables 2 and 3 respectively.

#### 613 **Microarray assay**

614 Total RNA was extracted from 30-40 2 and 4 dpf zebrafish larvae from each experimental group.  
615 Total RNA from each sample was used for the synthesis of cDNA, which was hybridized to 902007  
616 Affymetrix® Zebrafish Gene 1.0 ST Array with Ambion WT terminal labeling and hybridization protocol.  
617 In the annotation provided by Affymetrix for Zebrafish Gene 1.0 ST Array chip, 24497 probesets from  
618 73244 were annotated by gene names. We re-mapped the sequences of the probesets to Zv9/danRer7  
619 reference genome of zebrafish and used the RefSeq mRNA annotation track from UCSC genome browser  
620 annotation database to assign names for 30784 probesets in total, which were used in further analysis.

621 Two replicates showed good correlation between both controls and 5-HT-induced conditions  
622 (Pearson correlation coefficient calculated for all probesets,  $r=0.98$ ,  $p\text{-value}<10^{-16}$ ). Therefore, in the  
623 calculations we always used average values between two replicates.

624 Gene Set Enrichment Analysis (GSEA) was performed using the standard GSEA software, pre-  
625 ranked analysis [66] was done with Gene Ontologies for zebrafish. The gene ranks were formed by  
626 selecting the probesets showing the maximal by absolute value difference between two compared  
627 conditions. All probesets annotated by gene names have been considered in this analysis, which  
628 resulted in the values associated to 20691 distinct gene names.

629 The transcriptomic data discussed in this publication have been deposited in NCBI's Gene  
630 Expression Omnibus and are accessible through GEO Series accession number GSE122201.

#### 631 **Statistical analysis**

632 For the statistical analysis we used Statistica 10 (StatSoft), XLstat (Addinsoft) or Prism 7  
633 (GraphPad) software packages. All data are presented as average  $\pm$  s.e.m. or 95% confidence interval  
634 (see Figure legends). Unpaired Student's t-test was used when two groups were compared after the  
635 normal distribution test was passed otherwise ANOVA test was applied. A non-linear regression with  
636 one phase exponential decay equation and further comparison of the equation parameters with an  
637 extra sum-of-square F-test was used to estimate differences in the habituation to startle response. More  
638 detailed information on the statistical analysis is given in the Figure legends. Differences were taken as  
639 statistically significant in case of  $p<0.05$ .

## 640 Figure legends

### 641 Fig. 1. Distribution, synthesis and transport of 5-HT in zebrafish embryo during early developmental 642 stages.

643 (A-H) – Distribution of 5-HT in zebrafish early embryos. (A) – 2-cell stage; (B) – 32-cell stage; (C-E) – 128-  
644 cell stage; (F) – blastula; (G-H) – 50%-epiboly. (A-C, F and H) – General view. (D-E, G) – Optical sections.  
645 Note the absence of a 5-HT concentration gradient within the cleaving part of the embryo.

646 (I) – Expression of 5-HT membrane transporters (*serta*, *sertb*), vesicular monoamine transporter (*vmat*),  
647 tryptophan hydroxylases (*tph1a*, *tph1b*, *tph2*) and monoamine oxidase (*maoa*) and ribosomal protein  
648 *rpl5b* as an internal control in embryos and 4dpf larva.

649 (J) – Zebrafish embryo (blastula) is capable to uptake 5-HT from the media (for other stages see Fig. S1).  
650 Sagittal optic sections and a full stack (30 min) of control and experimental embryos from three  
651 consecutive time points after 5-HT application. Fluoxetine (Flx) selectively inhibits the 5-HT reuptake.  
652 Note the variation in 5-HT uptake capability among cells both in periderm and in deeper layers.

653 (K) – Reserpine, a specific blocker of monoamines vesicular transporter, causes a decrease of 5-HT level.  
654 High magnification images, single optical sections of 128-cell embryo.

655 (L-O) – Quantification of a 5-HT level in the cleaving part of the embryo after specific pharmacological  
656 manipulations. Relative brightness of a 5-HT immunostaining is plotted on the corresponding graphs. 1<sup>st</sup>  
657 and 2<sup>nd</sup> steps of 5-HT synthesis (tryptophan hydroxylase (L) and aromatic decarboxylase (M),  
658 respectively) as well 5-HT uptake (N) and release (O) are tested. Note that inhibition of neither 1<sup>st</sup> nor  
659 2<sup>nd</sup> stage of 5-HT synthesis results in significant 5-HT decrease. But the same substances reduce the  
660 synthesis of 5-HT from supplemented precursors. SSRIs (fluoxetine and citalopram) demonstrate the  
661 same effect on 5-HT level within the analyzed cells. While blocker of vesicular monoamine transport  
662 reserpine reduces a 5-HT level. Data represented as mean  $\pm$  s.e.m.; T-test; n=20-60 embryos; ns – non-  
663 significant; \*\* –  $p < 0.01$ ; \*\*\* –  $p < 0.001$ .

664 (P-W) – Analysis of 5-HT distribution after co-injection with TRITC-dextran marker. (P-R) – Experimental  
665 strategy outlines. (S1, T1, U1, V1 and W1-W2) – maximum intensity projection view; (V2) – optical  
666 section. (S2, T2, U2, V3, W3) – Linear brightness plots for the green and red channels generated from a  
667 single optical section. Note that 5-HT localization and amounts do not differ from the uniform  
668 distribution of 5-HT in a later embryo after the injection in a zygote or in a 64-cell embryo. At the same  
669 time, the injection into blastula leads to the preferential accumulation of 5-HT in the periblast with  
670 some gradient forming in the adjacent cells.

671 Scale bars: (A-C, G-H, J, S1, T1, U1, V1, W1) – 100  $\mu$ m; (D, K) – 15  $\mu$ m; (E) – 5  $\mu$ m; (V2) – 30  $\mu$ m; (W3) – 50  
672  $\mu$ m.

673

### 674 Fig. 2. Modulation of pre-neural 5-HT causes delayed effects in 5-HT distribution in zebrafish larvae.

675 (A-C) – 5-HT-positive cells in 1 dpf zebrafish larva injected with 5-HT or reserpine in combination with  
676 TRITC-dextran at zygote stage. (A1-A4) – TRITC-dextran- and DMSO-injected control; (B1-B4) – injection  
677 with reserpine; (C1-C4) – injection with 5-HT. Note that in case of 5-HT administration, the levels of the  
678 background staining in tissues are increased, while characteristic 5-HT-containing cells are not  
679 contrasted at all.

680 (D-G) – 5-HT-expressing cells in the head region of the fish injected with 5-HT and TRITC-dextran into  
681 yolk at a blastula stage. (D-E) – 1 dpf, (F-G) – 2 dpf. (D1-D2, F) – TRITC-dextran and DMSO-injected  
682 control; (E1-E2, G) – 5-HT-injected fish.

683 (H-L) – 5-HT-expressing cells in the head of 2 dpf zebrafish larvae. (H1-H2) Vehicle; (I1-I2) fish injected  
684 with 5-HT and (J1-J2) reserpine at a zygote stage; (K1-K2) fish incubated in 1 mM 5-HTP and (L1-L2) 10  
685  $\mu$ M reserpine for 24 hours between 1 dpf and 2 dpf.

686 (M-N) – 5-HT-positive neurons in the brain of 4 dpf larvae. Vehicle (M) and fish injected with 5-HT at a  
687 zygote stage.

688 (O-T) – Relative brightness of the anti-5-HT staining in cells of 2 dpf larvae. (O, P) – head of the fish (O)  
689 with 3D rendering (P) used to generate measurements of brightness in the volume of serotonergic cells  
690 plotted on the graphs in panels (R-T). (HY) - Cells belonging to hypothalamus together with superior  
691 raphe; (AP) arrowhead population and (PG) pineal gland. (R-T) – brightness of 5-HT staining  
692 measurements. Data represented as mean  $\pm$  s.e.m.; T-test; n=7-10 larvae.

693 Scale bars: (A-C, D1, E1, F-G, H1, I1, J1, K1, L1, O-P) – 100  $\mu$ m; (D2, E2) – 30  $\mu$ m; (H2, I2, J2, K2, L2) – 50  
694  $\mu$ m.

695

696 **Fig. 3. HPLC measurements of monoamines and their metabolites in fish after the modulation of 5-HT**  
697 **levels at pre-neural (zygote) and early neural (1-2 dpf) developmental stages.**

698 (A) – Scheme of the experiment.

699 (B-D) – 5-HT and its main metabolite 5-hydroxyindoleacetic acid (5-HIAA) content in the whole 2 dpf  
700 zebrafish larvae (B) and in the separated heads of 2 dpf (C) and 6 dpf (D) fish. 5-HIAA/5-HT – metabolite  
701 to monoamine ratio. Measurements are plotted for the control (vehicle), the fish injected with 5-HT or  
702 reserpine at a zygote stage and for the larvae incubated in 1 mM 5-HTP or 10  $\mu$ M reserpine for 24 hours  
703 between 1 and 2 dpf (see the color code in the figure). In (B-C) the measurements were done for 5  
704 whole fish or severed heads per sample (B, C) and for the one fish in (D). Data for the other measured  
705 substances can be found in Fig. S5. Data represented as mean  $\pm$  s.e.m., T-test.

706 (E-G) – Summarized results of measurements of relative quantities of all analyzed substances shown as  
707 folds to control. Groups of experiments were the same as outlined in (B-D).

708 (H-N) – PCA (principal component analysis) plots of monoamines and their metabolites content as  
709 variables identified in the experimental groups listed above.

710 (H-I) – Comparing the monoamine levels in 2 dpf whole fish and separated heads in control and after 5-  
711 HT administration in a zygote. (H) – Group barycenters shown on the plane of the first two principal  
712 components together with 95% confidence ellipses. (I) – Visualizing variable contributions to the first  
713 two principal components of (H).

714 (J-N) – Comparisons of the monoamine levels in 2 dpf and 5 dpf fish heads analyzed at different  
715 experimental steps. (J) – All group barycenters shown on the plane of the first two principal  
716 components. Confidence ellipses are plotted for the experimental groups at 2 dpf (K) and 6 dpf (L)  
717 derived from the same PCA plot. (M) – Visualizing variable contributions to the first two principal  
718 components of (J). (N) – Barycenter displacement for the 2 dpf and the 6 dpf groups shown on the plane  
719 of the first two principal components.

720

721 **Fig. 4. Selective modulation of a 5-HT level in a cleaving pre-neural embryo alters larval behavior.**

722 (A) – Outline of treatments and behavioral assays.



723 (B) – The frequency of spontaneous coiling of a trunk in 1 dpf larvae after the 5-HT injections into a  
724 zygote and also after the incubation of embryos in different substances starting from a zygote till late  
725 blastula stage.

726 (C) – Startle response to tactile stimulation, 4 dpf.

727 (D, E) – Spontaneous swimming activity of 5 dpf and 6 dpf larvae. (D) – Larvae administered with 5-HT at  
728 a zygote stage without or with the following incubation in fluoxetine for 24 hours between 4 dpf and 5  
729 dpf. (E) – Fish injected with 5-HT or reserpine at a zygote stage and either incubated in 1 mM 5-HTP or in  
730 10  $\mu$ M reserpine for 24 hours between 1 and 2 dpf.

731 (F-H) – Startle response test (sound stimulation). (F) - Illustration of a startle response. (G) – The same  
732 design as shown in panel (D). (H) – The same design as shown in (E).

733 (I-R) – Short term habituation to a touch response (I and J) and to a startle response (K and L). Results  
734 are presented as a proportion of the responding fish to the total number for each stimulus. (I and J)  
735 Graphs showing the data for the control (vehicle) condition and for the fish injected with 5-HT into a  
736 zygote. Plots in panels (K and L) represent the same treatments as described in a panel (D). Graphs show  
737 a non-linear regression with one phase exponential decay equation and p-values for the comparison of  
738 the regression equation parameters with an extra sum-of-square F-test. (M) – Summary plot for the  
739 regression graphs of the experimental points from panels (I-L). (N) – Explanatory graph for the equation  
740 parameters. X-axis is a time; Y-axis is a response. Y starts as equal to (Span + Plateau) and decreases to  
741 Plateau with a rate constant K. (O-R) – Comparison of fit's equation parameters for the experimental  
742 points given on the plots (I-L). Span and Plateau are expressed in the same units as the Y-axis. K is  
743 expressed in the inverse manner of the units used for the X-axis (stimulus number).

744 Data represented as mean  $\pm$  s.e.m. (B-H), or mean  $\pm$  95% confidence interval (O-Q) ; (B, C, E, G, H) - T-  
745 test; (D) – one-way ANOVA and T-test; (I-L) – extra sum-of-squares F test for the equality of regression  
746 fit curves; (D-H) - n=150-200 larvae; ns – non-significant; \* – p<0.05; \*\* – p<0.01; \*\*\* – p<0.001.

747

748 **Fig. 5. Increase of pre-neural 5-HT induces systemic and long-lasting changes in the transcriptome of**  
749 **the developing fish.**

750 (A) – Scheme of the experiment.

751 (B, C) – Dependence of normalized response in 2 dpf and 4 dpf fish to 5-HT (B) and reserpine (C)  
752 injections at the zygote stage. For 5-HT Pearson correlation coefficient  $r = -0.41$ , p-value  $< 10^{-16}$ . Red  
753 circles (for 5-HT n=611; 0.4% of the total number of probe sets) represent the probe sets with the  $\log_2$   
754 ratio between days 4 and 2 more than 2.0, and green circles (for 5-HT n=305; 0.2%) are the probe sets  
755 with the  $\log_2$  ratio between days 4 and 2 less than -2.0.

756 (D, E) – Day-effect on the response to 5-HT (D) and reserpine (E) as a function of the day-effect in the  
757 control experiments.

758 (F) – Results of hierarchical clustering using 1000 most variable probesets across all conditions. (G) –  
759 Correlation matrix for the same probesets. For (G and H) the data were normalized by applying double  
760 centering to the initial logged expression matrix.

761 (H) – PCA plot (horizontal plane) and clustering the experimental conditions (Z axis), based on 1000 most  
762 variable probesets; biological replicas are averaged. (I) – same PCA as on (H), shifts between day points  
763 are shown.

764 (L, M) – Measured expression changes for the selected genes in 2 dpf (L) and 4 dpf (M) fish injected with  
765 5-HT. The fold changes measured by microarray (dark grey) are validated by qPCR measurements (light  
766 grey).

767 (N) – Scores of the 5-HT effect and variance among all experimental groups for genes chosen for qPCR  
768 validation.

769

770 **Fig. 6. Analysis of systemic changes in the transcriptomes of zebrafish larvae in response to the early**  
771 **pre-neural 5-HT modulation.**

772 (A-E) – Gene ontology term enrichment analysis using ZEOGS tool for identifying organs characterized by  
773 specific expression of genes with the highest 5-HT-effect scores in 2 dpf (A) and 4 dpf (B) larvae. (C-E)  
774 highlights the locations corresponding to the most statistically significant anatomical terms for the genes  
775 in 2 dpf fish (C), 4 dpf fish brain (D) and whole 4 dpf fish (E).

776 (F-H) – REVIGO visualization of gene set enrichment analysis (GSEA) results using gene ranking  
777 accordingly to the 5-HT-effect score. GO terms are grouped by biological process (F), cellular structure  
778 (G) and molecular function (H) of related gene sets. See Supplementary Dataset 1 for the complete lists.

779 (J-K) – Network analysis of the genes with the highest level of 5-HT-effect scores, using network of high-  
780 confidence (not only computationally predicted) functional interactions from REACTOME pathway  
781 database (Zebrafish subset). (J) - top 5-HT-reacting genes are functionally related (interact with each  
782 other), more frequently than expected by random choice of genes with the same connectivity  
783 distribution; the significance is estimated using OFTEN score, with a peak at 300 top ranked genes. (K) –  
784 the functional interaction network between top ranked 5-HT-reacting genes, constructed from  
785 REACTOME; three over-represented pathways are highlighted by node edge color.

786 (L) – Proposed model for the early 5-HT role in zebrafish.

787

788

789 **Fig. S1. Expression of 5-HT-related, melatonin-related and kynurenine-related genes during early**  
790 **development of zebrafish and human.**

791 Hierarchical clustering of developmental transcriptomics data for zebrafish (A) and human (B). Data  
792 were obtained from public sources (see the text).

793

794 **Fig. S2. Synthesis and transport of 5-HT in an early zebrafish embryo.**

795 (A-B) – 5-HT-levels measured as a relative brightness of a 5-HT immunostaining in the cleaving part (A)  
796 and the yolk cell (B) of an embryo after incubations in tryptophan, 5-HTP and 5-HT at different stages of  
797 zebrafish early development.

798 (C-F) – 5-HT-immunostaining of embryos after incubations in tryptophan, 5-HTP and 5-HT. Incubation  
799 intervals are the same as shown in (A-B).

800 (G-H) – 5-HT-levels (relative brightness of a 5-HT immunostaining) in the cleaving part of an embryo. (G)  
801 - 5-HT was applied in different concentrations for 1 hour at a 2-cell stage. (H) – change of 5-HT-level  
802 through the time after the application of 5-HT at 2-cell stage with or without SSRI citalopram.

803 (I) – Change of 5-HT-level (measured as a relative brightness of a 5-HT immunostaining) over time in the  
804 whole embryo volume after the injection into a zygote, folds change to control. The sample size for each  
805 point is given in parentheses.

806 All data represented as mean  $\pm$  s.e.m.; T-test; ns – non-significant; \*\* –  $p < 0.01$ ; \*\*\* –  $p < 0.001$ .

807 Scale bars: (C-F) – 100  $\mu$ m.

808

809 **Fig. S3. Rostrocaudal length in zebrafish embryos after the exposure to 5-HT and 5-HT-related**  
810 **substances during early pre-neural developmental stages.**

811 (A) – Examples of representative 2 dpf fish larvae after early pre-neural application of 5-HT, its  
812 precursors and blockers of synthesis.

813 (B) – Scheme of measurements.

814 (C-E) – Comparison of rostrocaudal fish length (C, E) and head/body proportions (D, F) in 2 dpf (C, D)  
815 and 4 dpf (E, F) larvae. Data represented as mean  $\pm$  s.e.m.;  $n = 20-110$ ; T-test; \* –  $p < 0.05$ ; \*\* –  $p < 0.01$ ;  
816 \*\*\* –  $p < 0.001$ .

817

818 **Fig. S4. Left-right polarity is not affected after the exposure of cleaving zebrafish embryos to the**  
819 **selective 5-HT<sub>4</sub> receptor antagonist GR-113808 and inhibitors of a 5-HT synthesis and transport.**

820 (A) – Left-right polarity abnormalities of the heart. Atrioventricular heart asymmetry orientation in 2-3  
821 dpf larvae was analyzed.

822 (B) – Ratio of heart asymmetry abnormalities in embryos exposed to different substances starting from a  
823 zygote until the late blastula stage.

824

825 **Fig. S5. HPLC-measurements of monoamines and their metabolites in fish after modulations of 5-HT**  
826 **levels at pre-neural (zygote) and early neural (1-2 dpf) developmental stages.**

827 (A) – Calibration curves for the measured substances (experiment performed with different numbers of  
828 2-dpf larvae per measured sample).

829 (B) – Levels of dopamine (DA), noradrenaline (NA), dopamine metabolites 3,4-dihydroxyphenylacetic  
830 acid (DOPAC) and homovanillic acid (HVA) in the whole 2 dpf zebrafish larvae and in the severed heads  
831 of 2 dpf and 6 dpf fish. Experimental groups and conditions are the same as shown in the Fig. 3(A-D).

832

833 **Fig. S6. Analysis of 5 dpf larvae behavior after the early 5-HT increase and 4-5 dpf exposure to**  
834 **fluoxetine.**

835 (A-C) – Spontaneous swimming activity. (A) – Speed, (B) – bouts frequency, (C) – displacement per bout.

836 (D-H) – Results of the dark pulse test for 5 dpf fish. The larvae were subjected to a 10-min interval of  
837 complete darkness. Swimming activity was recorded continuously starting 10 min before the dark pulse,  
838 in darkness and for 10 min after the end of the dark pulse. Experimental groups were the same as  
839 described in Fig 4D.

840 (I-L) – Hyperactivity in response to sudden change in light intensity. (I, J) – Turning the light off triggers a  
841 stress response and is followed by sustained increase in activity. 5-HT injection at zygote stage, or Flx

842 incubation for 24h prior to testing decrease the amplitude of the response. (K, L) – Turning the light on  
843 (virtually instantaneous increase in white light intensity from 0 to ~300 lux) triggers a startle response  
844 followed by transient increase in spontaneous activity. The amplitude of the startle response is reduced  
845 by incubation with Flx for 24h prior to testing.

846 All data represented as mean  $\pm$  s.e.m.; factorial ANOVA followed by student's t-test for pair-wise  
847 comparisons; n=150-200 larvae; \* –  $p < 0.05$ ; \*\* –  $p < 0.01$ .

848

849

#### 850 **Fig. S7. Reactome functional interaction network analysis with OFTEN method.**

851 (A) – The largest connected component formed by functional interactions from REACTOME database  
852 between 400 top scored 5-HT-effect genes, with both signs, positive (shown by red) and negative  
853 (shown by green). Dashed lines correspond to functional interactions of low confidence (mostly,  
854 predicted by computational methods or deduced from co-participation in a molecular complex).

855 (B) – Guanine nucleotide binding-related subnetwork (all proteins functionally interacting with GNB1  
856 through one interaction). (C) – RHOC-related subnetwork (all proteins functionally interacting with  
857 RHOC through one or two interactions). (D) –  $\beta$ -catenin-related subnetwork (all proteins functionally  
858 interacting with CTNNB1 through one interaction).

859

860

#### 861 **Bibliography**

- 862 1. Sloley BD (2004) Metabolism of monoamines in invertebrates: the relative importance of  
863 monoamine oxidase in different phyla. *Neurotoxicology* 25: 175–183. doi:10.1016/S0161-  
864 813X(03)00096-2.
- 865 2. Berger M, Gray JA, Roth BL (2009) The expanded biology of serotonin. *Annu Rev Med* 60: 355–  
866 366. doi:10.1146/annurev.med.60.042307.110802.
- 867 3. Bianchi P, Pimentel DR, Murphy MP, Colucci WS, Parini A (2005) A new hypertrophic mechanism  
868 of serotonin in cardiac myocytes: receptor-independent ROS generation. *FASEB J* 19: 641–643.  
869 doi:10.1096/fj.04-2518fje.
- 870 4. Ren G, Li S, Zhong H, Lin S (2013) Zebrafish tyrosine hydroxylase 2 gene encodes tryptophan  
871 hydroxylase. *J Biol Chem* 288: 22451–22459. doi:10.1074/jbc.M113.485227.
- 872 5. Ramamoorthy S, Samuvel DJ, Buck ER, Rudnick G, Jayanthi LD (2007) Phosphorylation of threonine  
873 residue 276 is required for acute regulation of serotonin transporter by cyclic GMP. *J Biol Chem*  
874 282: 11639–11647. doi:10.1074/jbc.M611353200.
- 875 6. Marin P, Chanrion B, Bockaert J (2007) Quand deux molécules impliquées dans la régulation de  
876 l'humeur se rencontrent. *Med Sci (Paris)* 23: 554–555. doi:10.1051/medsci/2007235554.
- 877 7. Carneiro AMD, Cook EH, Murphy DL, Blakely RD (2008) Interactions between integrin  
878  $\alpha$ IIb $\beta$ 3 and the serotonin transporter regulate serotonin transport and platelet aggregation  
879 in mice and humans. *J Clin Invest* 118: 1544–1552. doi:10.1172/JCI33374.
- 880 8. Muma NA, Mi Z (2015) Serotonylation and transamidation of other monoamines. *ACS Chem*  
881 *Neurosci* 6: 961–969. doi:10.1021/cn500329r.

- 882 9. Lillesaar C (2011) The serotonergic system in fish. *J Chem Neuroanat* 41: 294–308.  
883 doi:10.1016/j.jchemneu.2011.05.009.
- 884 10. Lawrence AJ, Soame JM (2009) The endocrine control of reproduction in Nereidae: a new multi-  
885 hormonal model with implications for their functional role in a changing environment. *Philos*  
886 *Trans R Soc Lond B, Biol Sci* 364: 3363–3376. doi:10.1098/rstb.2009.0127.
- 887 11. Stricker SA, Smythe TL (2000) Multiple triggers of oocyte maturation in nemertean worms: the  
888 roles of calcium and serotonin. *J Exp Zool* 287: 243–261. doi:10.1002/1097-  
889 010X(20000801)287:3<243::AID-JEZ6>3.0.CO;2-B.
- 890 12. Hanocq-Quertier J, Baltus E (1981) Induction of meiosis of *Xenopus laevis* oocytes by mianserine.  
891 *Gamete Res* 4: 49–56. doi:10.1002/mrd.1120040108.
- 892 13. Colas JF, Launay JM, Maroteaux L (1999) Maternal and zygotic control of serotonin biosynthesis  
893 are both necessary for *Drosophila* germband extension. *Mech Dev* 87: 67–76.
- 894 14. Buznikov GA, Nikitina LA, Voronezhskaya EE, Bezuglov VV, Dennis Willows AO, et al. (2003)  
895 Localization of serotonin and its possible role in early embryos of *Tritonia diomedea* (Mollusca:  
896 Nudibranchia). *Cell Tissue Res* 311: 259–266. doi:10.1007/s00441-002-0666-0.
- 897 15. Buznikov GA, Peterson RE, Nikitina LA, Bezuglov VV, Lauder JM (2005) The pre-nervous  
898 serotonergic system of developing sea urchin embryos and larvae: pharmacologic and  
899 immunocytochemical evidence. *Neurochem Res* 30: 825–837. doi:10.1007/s11064-005-6876-6.
- 900 16. Voronezhskaya EE, Khabarova MY, Nezlin LP, Ivashkin EG (2012) Delayed action of serotonin in  
901 molluscan development. *Acta Biol Hung* 63 Suppl 2: 210–216.  
902 doi:10.1556/ABiol.63.2012.Suppl.2.28.
- 903 17. Fukumoto T, Blakely R, Levin M (2005) Serotonin transporter function is an early step in left-right  
904 patterning in chick and frog embryos. *Dev Neurosci* 27: 349–363. doi:10.1159/000088451.
- 905 18. Fukumoto T, Kema IP, Levin M (2005) Serotonin signaling is a very early step in patterning of the  
906 left-right axis in chick and frog embryos. *Curr Biol* 15: 794–803. doi:10.1016/j.cub.2005.03.044.
- 907 19. Vandenberg LN, Lemire JM, Levin M (2013) Serotonin has early, cilia-independent roles in  
908 *Xenopus* left-right patterning. *Dis Model Mech* 6: 261–268. doi:10.1242/dmm.010256.
- 909 20. Beyer T, Danilchik M, Thumberger T, Vick P, Tisler M, et al. (2012) Serotonin signaling is required  
910 for Wnt-dependent GRP specification and leftward flow in *Xenopus*. *Curr Biol* 22: 33–39.  
911 doi:10.1016/j.cub.2011.11.027.
- 912 21. Bashammakh S, Seyfried S, Bader M, Kotnik Halavaty K (2014) Serotonin is required for pharyngeal  
913 arch morphogenesis in zebrafish. *ScienceOpen Res*. doi:10.14293/S2199-1006.1.SOR-  
914 LIFE.AWPDLZ.v1.
- 915 22. Buznikov GA, Chudakova IV, Zvezdina ND (1964) The role of neurohumours in early  
916 embryogenesis. i. serotonin content of developing embryos of sea urchin and loach. *J Embryol Exp*  
917 *Morphol* 12: 563–573.
- 918 23. Pei S, Liu L, Zhong Z, Wang H, Lin S, et al. (2016) Risk of prenatal depression and stress treatment:  
919 alteration on serotonin system of offspring through exposure to Fluoxetine. *Sci Rep* 6: 33822.  
920 doi:10.1038/srep33822.
- 921 24. Ori M, De Lucchini S, Marras G, Nardi I (2013) Unraveling new roles for serotonin receptor 2B in  
922 development: key findings from *Xenopus*. *Int J Dev Biol* 57: 707–714. doi:10.1387/ijdb.130204mo.

- 923 25. Bhasin N, LaMantia AS, Lauder JM (2004) Opposing regulation of cell proliferation by retinoic acid  
924 and the serotonin<sub>2B</sub> receptor in the mouse frontonasal mass. *Anat Embryol (Berl)* 208: 135–143.  
925 doi:10.1007/s00429-004-0380-7.
- 926 26. Barreiro-Iglesias A, Mysiak KS, Scott AL, Reimer MM, Yang Y, et al. (2015) Serotonin promotes  
927 development and regeneration of spinal motor neurons in zebrafish. *Cell Rep* 13: 924–932.  
928 doi:10.1016/j.celrep.2015.09.050.
- 929 27. Doze VA, Perez DM (2012) G-protein-coupled receptors in adult neurogenesis. *Pharmacol Rev* 64:  
930 645–675. doi:10.1124/pr.111.004762.
- 931 28. Pérez MR, Pellegrini E, Cano-Nicolau J, Gueguen M-M, Menouer-Le Guillou D, et al. (2013)  
932 Relationships between radial glial progenitors and 5-HT neurons in the paraventricular organ of  
933 adult zebrafish - potential effects of serotonin on adult neurogenesis. *Eur J Neurosci* 38: 3292–  
934 3301. doi:10.1111/ejn.12348.
- 935 29. Airhart MJ, Lee DH, Wilson TD, Miller BE, Miller MN, et al. (2012) Adverse effects of serotonin  
936 depletion in developing zebrafish. *Neurotoxicol Teratol* 34: 152–160.  
937 doi:10.1016/j.ntt.2011.08.008.
- 938 30. Prasad P, Ogawa S, Parhar IS (2015) Role of serotonin in fish reproduction. *Front Neurosci* 9: 195.  
939 doi:10.3389/fnins.2015.00195.
- 940 31. Cerdà J, Petrino TR, Greenberg MJ, Wallace RA (1997) Pharmacology of the serotonergic inhibition  
941 of steroid-induced reinitiation of oocyte meiosis in the teleost *Fundulus heteroclitus*. *Mol Reprod*  
942 *Dev* 48: 282–291. doi:10.1002/(SICI)1098-2795(199710)48:2<282::AID-MRD17>3.0.CO;2-#.
- 943 32. Cerdà J, Reich G, Wallace RA, Selman K (1998) Serotonin inhibition of steroid-induced meiotic  
944 maturation in the teleost *Fundulus heteroclitus*: role of cyclic AMP and protein kinases. *Mol*  
945 *Reprod Dev* 49: 333–341. doi:10.1002/(SICI)1098-2795(199803)49:3<333::AID-MRD14>3.0.CO;2-  
946 X.
- 947 33. Cerdà J, Subhedar N, Reich G, Wallace RA, Selman K (1998) Oocyte sensitivity to serotonergic  
948 regulation during the follicular cycle of the teleost *Fundulus heteroclitus*. *Biol Reprod* 59: 53–61.
- 949 34. Cerdà J, Petrino TR, Lin Y-WP, Wallace RA (1995) Inhibition of *Fundulus heteroclitus* oocyte  
950 maturation in vitro by serotonin (5-hydroxytryptamine). *J Exp Zool* 273: 224–233.  
951 doi:10.1002/jez.1402730307.
- 952 35. Chattoraj A, Seth M, Maitra SK (2008) Influence of serotonin on the action of melatonin in MIH-  
953 induced meiotic resumption in the oocytes of carp *Catla catla*. *Comp Biochem Physiol Part A, Mol*  
954 *Integr Physiol* 150: 301–306. doi:10.1016/j.cbpa.2008.03.014.
- 955 36. Godwin J (2010) Neuroendocrinology of sexual plasticity in teleost fishes. *Front Neuroendocrinol*  
956 31: 203–216. doi:10.1016/j.yfrne.2010.02.002.
- 957 37. Larson ET, Norris DO, Gordon Grau E, Summers CH (2003) Monoamines stimulate sex reversal in  
958 the saddleback wrasse. *Gen Comp Endocrinol* 130: 289–298.
- 959 38. Ivashkin E, Khabarova MY, Melnikova V, Nezlin LP, Kharchenko O, et al. (2015) Serotonin mediates  
960 maternal effects and directs developmental and behavioral changes in the progeny of snails. *Cell*  
961 *Rep* 12: 1144–1158. doi:10.1016/j.celrep.2015.07.022.
- 962 39. Yang H, Zhou Y, Gu J, Xie S, Xu Y, et al. (2013) Deep mRNA sequencing analysis to capture the  
963 transcriptome landscape of zebrafish embryos and larvae. *PLoS One* 8: e64058.  
964 doi:10.1371/journal.pone.0064058.

- 965 40. Yan L, Yang M, Guo H, Yang L, Wu J, et al. (2013) Single-cell RNA-Seq profiling of human  
966 preimplantation embryos and embryonic stem cells. *Nat Struct Mol Biol* 20: 1131–1139.  
967 doi:10.1038/nsmb.2660.
- 968 41. Maximino C, P. Costa B, G. Lima M (2016) A Review of Monoaminergic Neuropsychopharmacology  
969 in Zebrafish, 6 Years Later: Towards Paradoxes and their Solution. *Curr Psychopharmacol* 5: 96–  
970 138. doi:10.2174/2211556005666160527105104.
- 971 42. Yokogawa T, Hannan MC, Burgess HA (2012) The dorsal raphe modulates sensory responsiveness  
972 during arousal in zebrafish. *J Neurosci* 32: 15205–15215. doi:10.1523/JNEUROSCI.1019-12.2012.
- 973 43. Prykhodzhiy SV, Marsico A, Meijssing SH (2013) Zebrafish Expression Ontology of Gene Sets (ZEOGS):  
974 a tool to analyze enrichment of zebrafish anatomical terms in large gene sets. *Zebrafish* 10: 303–  
975 315. doi:10.1089/zeb.2012.0865.
- 976 44. Croft D, Mundo AF, Haw R, Milacic M, Weiser J, et al. (2014) The Reactome pathway  
977 knowledgebase. *Nucleic Acids Res* 42: D472–7. doi:10.1093/nar/gkt1102.
- 978 45. Kairov U, Karpenyuk T, Ramanculov E, Zinoviyev A (2012) Network analysis of gene lists for finding  
979 reproducible prognostic breast cancer gene signatures. *Bioinformatics* 8: 773–776.  
980 doi:10.6026/97320630008773.
- 981 46. Peri S, Navarro JD, Kristiansen TZ, Amanchy R, Surendranath V, et al. (2004) Human protein  
982 reference database as a discovery resource for proteomics. *Nucleic Acids Res* 32: D497–501.  
983 doi:10.1093/nar/gkh070.
- 984 47. Shih D-F, Hsiao C-D, Min M-Y, Lai W-S, Yang C-W, et al. (2013) Aromatic L-amino acid  
985 decarboxylase (AADC) is crucial for brain development and motor functions. *PLoS One* 8: e71741.  
986 doi:10.1371/journal.pone.0071741.
- 987 48. Levin M, Buznikov GA, Lauder JM (2006) Of minds and embryos: left-right asymmetry and the  
988 serotonergic controls of pre-neural morphogenesis. *Dev Neurosci* 28: 171–185.  
989 doi:10.1159/000091915.
- 990 49. Emanuelsson H (1992) Autoradiographic localization in polychaete embryos of tritiated  
991 mesulergine, a selective antagonist of serotonin receptors that inhibits early polychaete  
992 development. *Int J Dev Biol* 36: 293–302.
- 993 50. Pennati R, Gropelli S, Sotgia C, Candiani S, Pestarino M, et al. (2001) Serotonin localization in  
994 *Phallusia mammillata* larvae and effects of 5-HT antagonists during larval development. *Dev*  
995 *Growth Differ* 43: 647–656.
- 996 51. Hämäläinen M, Kohonen J (1989) Studies on the effect of monoamine antagonists on the  
997 morphogenesis of the newt. *Int J Dev Biol* 33: 157–163.
- 998 52. Khozhaï LI, Puchkov VF, Otellin VA (1995) [The effect of a serotonin deficiency on mammalian  
999 embryonic development]. *Ontogenez* 26: 350–355.
- 1000 53. Markova LN, Sadykova KA, Sakharova NI (1990) [The effect of biogenic monoamine antagonists on  
1001 the development of preimplantation mouse embryos cultured in vitro]. *Zh Evol Biokhim Fiziol* 26:  
1002 726–732.
- 1003 54. Brustein E, Chong M, Holmqvist B, Drapeau P (2003) Serotonin patterns locomotor network  
1004 activity in the developing zebrafish by modulating quiescent periods. *J Neurobiol* 57: 303–322.  
1005 doi:10.1002/neu.10292.

- 1006 55. Sallinen V, Sundvik M, Reenilä I, Peitsaro N, Khrustalyov D, et al. (2009) Hyperserotonergic  
1007 phenotype after monoamine oxidase inhibition in larval zebrafish. *J Neurochem* 109: 403–415.  
1008 doi:10.1111/j.1471-4159.2009.05986.x.
- 1009 56. Airhart MJ, Lee DH, Wilson TD, Miller BE, Miller MN, et al. (2007) Movement disorders and  
1010 neurochemical changes in zebrafish larvae after bath exposure to fluoxetine (PROZAC).  
1011 *Neurotoxicol Teratol* 29: 652–664. doi:10.1016/j.ntt.2007.07.005.
- 1012 57. Kawashima T, Zwart MF, Yang C-T, Mensh BD, Ahrens MB (2016) The Serotonergic System Tracks  
1013 the Outcomes of Actions to Mediate Short-Term Motor Learning. *Cell* 167: 933–946.e20.  
1014 doi:10.1016/j.cell.2016.09.055.
- 1015 58. Pantoja C, Hoagland A, Carroll EC, Karalis V, Conner A, et al. (2016) Neuromodulatory regulation of  
1016 behavioral individuality in zebrafish. *Neuron* 91: 587–601. doi:10.1016/j.neuron.2016.06.016.
- 1017 59. Kim D-K, Tolliver TJ, Huang S-J, Martin BJ, Andrews AM, et al. (2005) Altered serotonin synthesis,  
1018 turnover and dynamic regulation in multiple brain regions of mice lacking the serotonin  
1019 transporter. *Neuropharmacology* 49: 798–810. doi:10.1016/j.neuropharm.2005.08.010.
- 1020 60. Hasegawa H, Nakamura K (2010) Tryptophan hydroxylase and serotonin synthesis regulation.  
1021 *Handbook of the behavioral neurobiology of serotonin. Handbook of behavioral neuroscience.*  
1022 Elsevier, Vol. 21. pp. 183–202. doi:10.1016/S1569-7339(10)70078-3.
- 1023 61. Neckers LM, Neff NH, Wyatt RJ (1979) Increased serotonin turnover in corpus striatum following  
1024 an injection of kainic acid: Evidence for neuronal feedback regulation of synthesis. *Naunyn*  
1025 *Schmiedebergs Arch Pharmacol* 306: 173–177. doi:10.1007/BF00498988.
- 1026 62. Westerfield M (n.d.) *The zebrafish book: a guide for the laboratory use of zebrafish.* ci.nii.ac.jp.
- 1027 63. Spulber S, Kilian P, Wan Ibrahim WN, Onishchenko N, Ulhaq M, et al. (2014) PFOS induces  
1028 behavioral alterations, including spontaneous hyperactivity that is corrected by dexamfetamine in  
1029 zebrafish larvae. *PLoS One* 9: e94227. doi:10.1371/journal.pone.0094227.
- 1030 64. Kehr J, Yoshitake T (2006) Monitoring brain chemical signals by microdialysis. *Encyclopedia of*  
1031 *Sensors.* USA: American Scientific Publishers, Vol. 6. pp. 287–312.
- 1032 65. Sacchetti P, Sousa KM, Hall AC, Liste I, Steffensen KR, et al. (2009) Liver X receptors and oxysterols  
1033 promote ventral midbrain neurogenesis in vivo and in human embryonic stem cells. *Cell Stem Cell*  
1034 5: 409–419. doi:10.1016/j.stem.2009.08.019.
- 1035 66. Subramanian A, Tamayo P, Mootha VK, Mukherjee S, Ebert BL, et al. (2005) Gene set enrichment  
1036 analysis: a knowledge-based approach for interpreting genome-wide expression profiles. *Proc*  
1037 *Natl Acad Sci USA* 102: 15545–15550. doi:10.1073/pnas.0506580102.



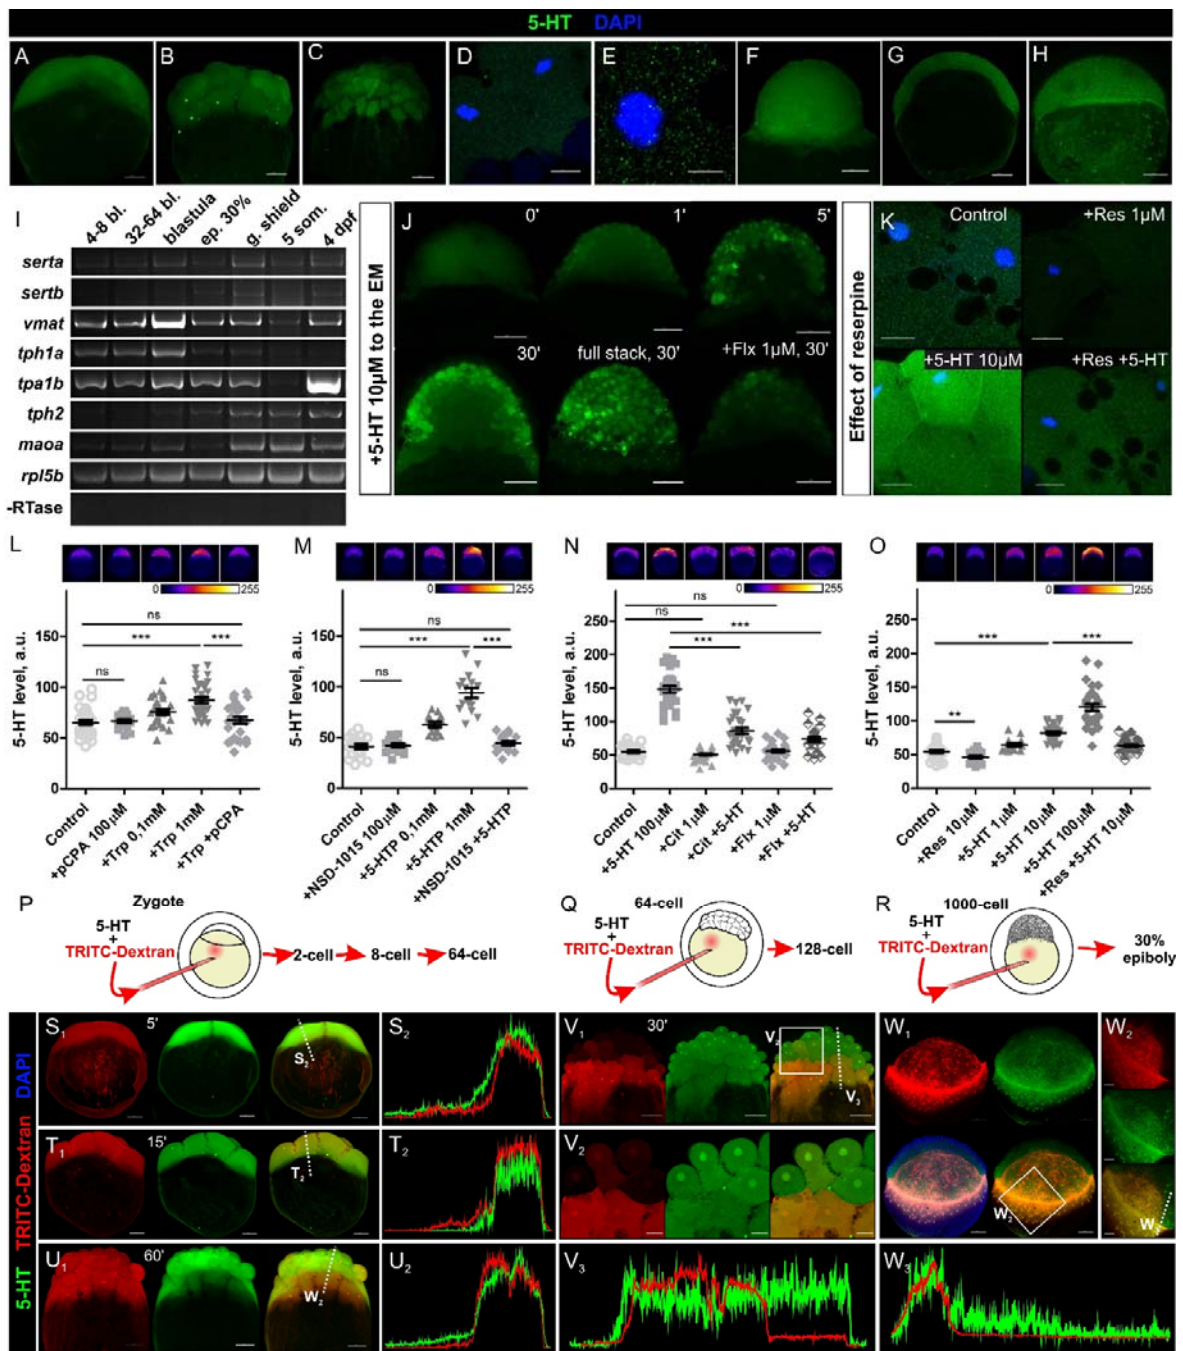

1038

Figure 1

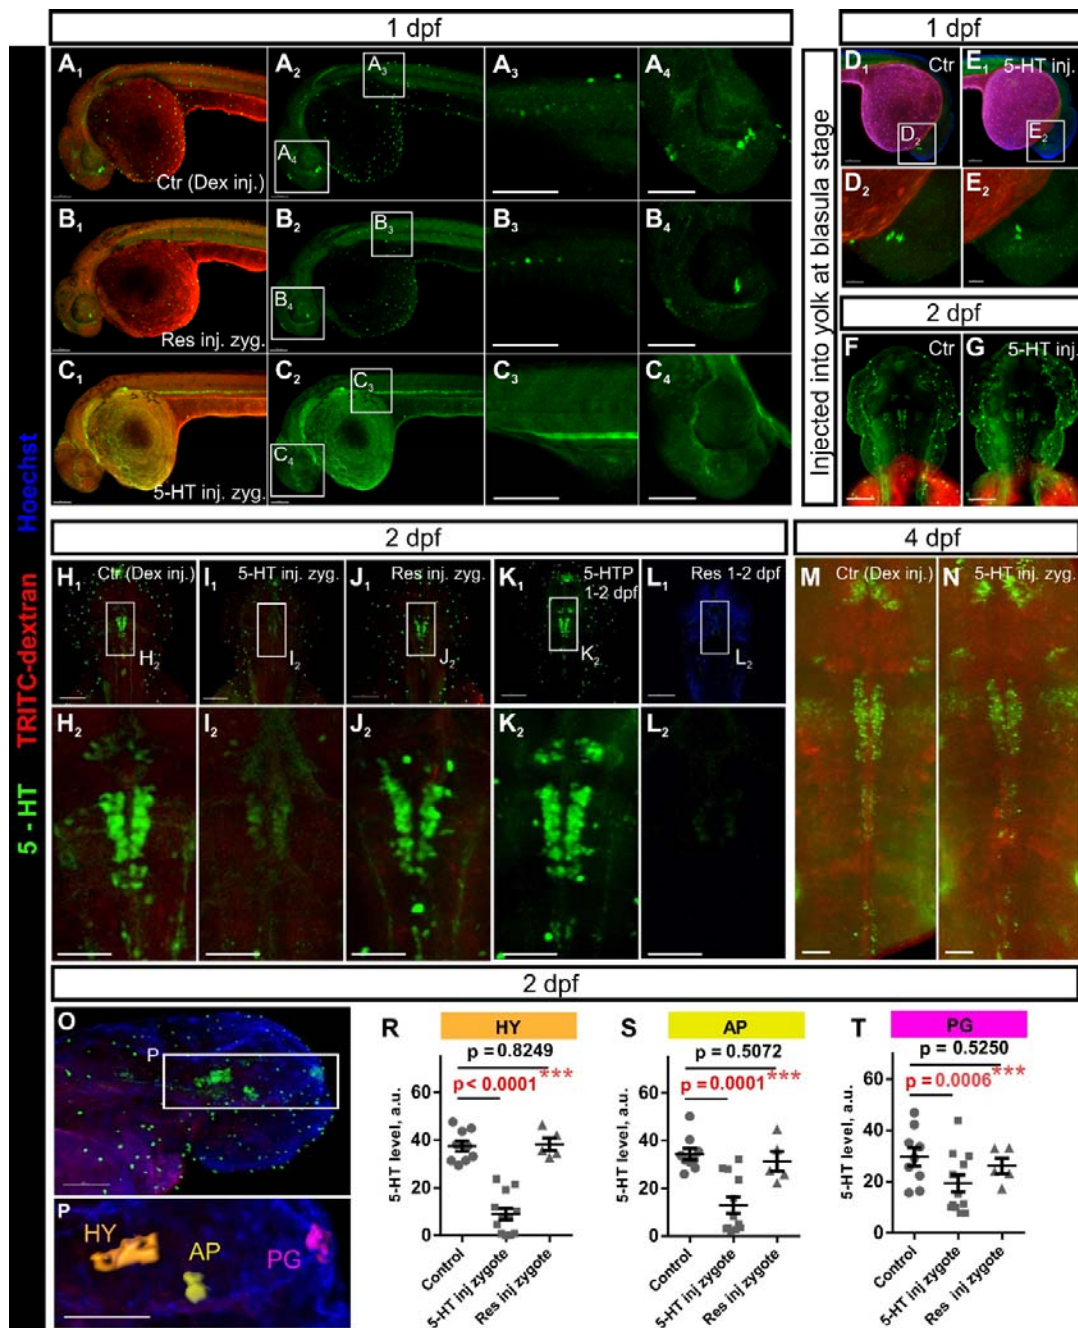

Figure 2

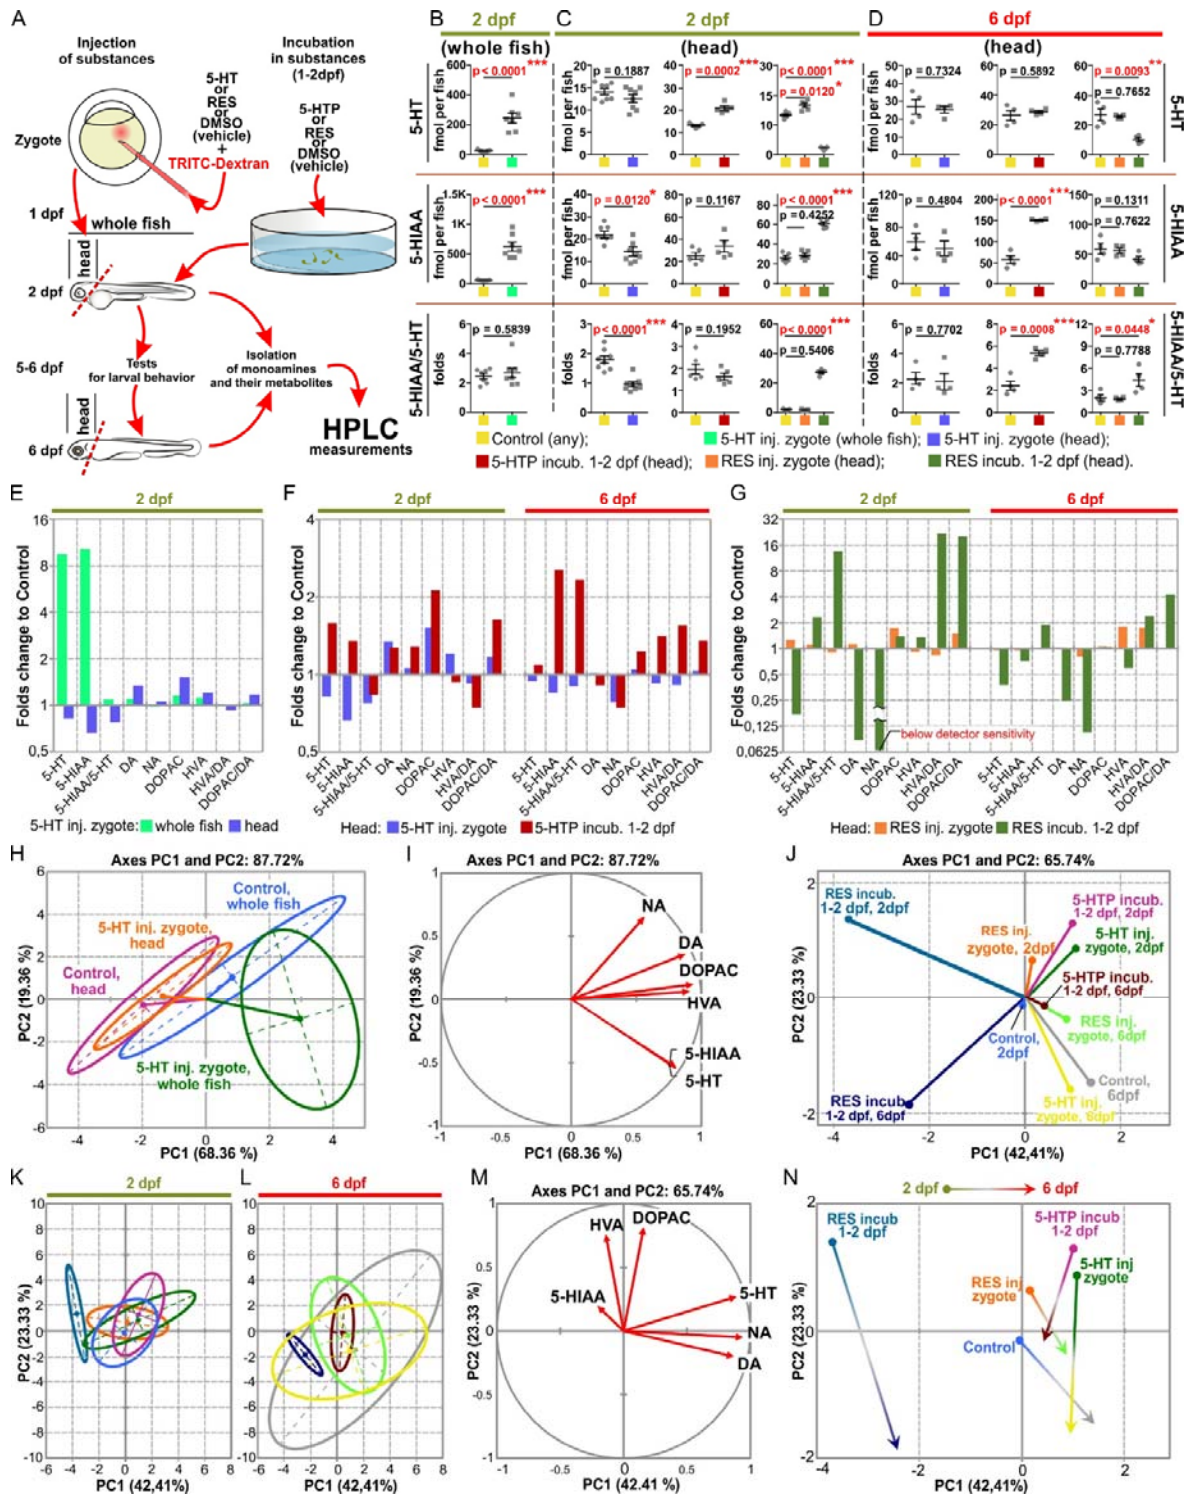

1040

Figure 3

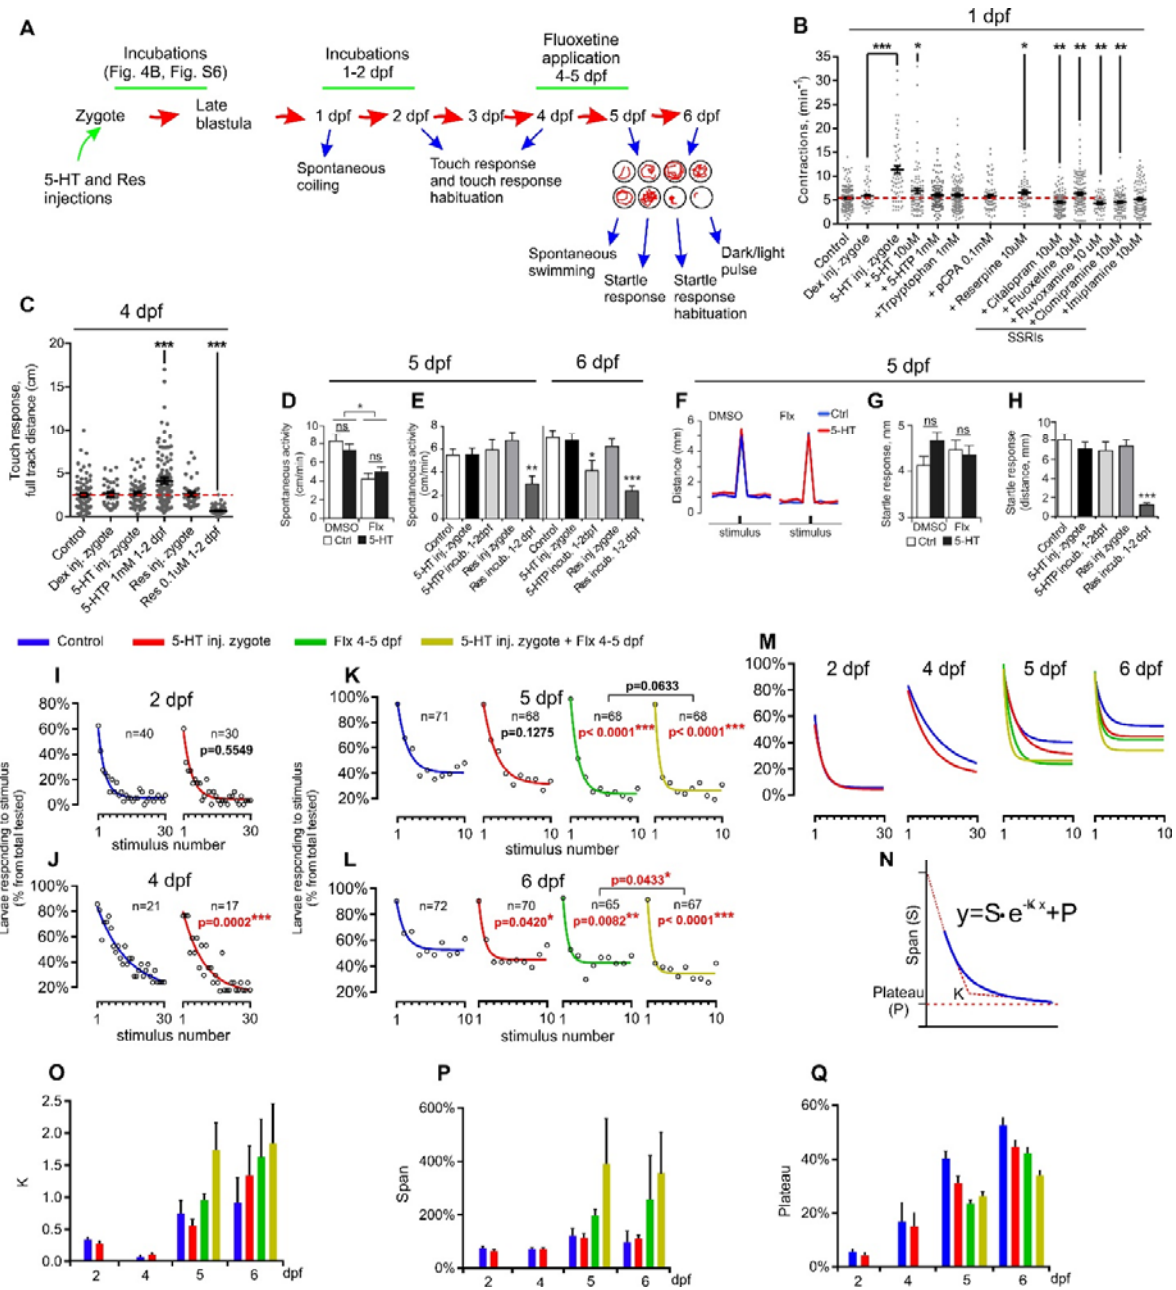

1041

Figure 4

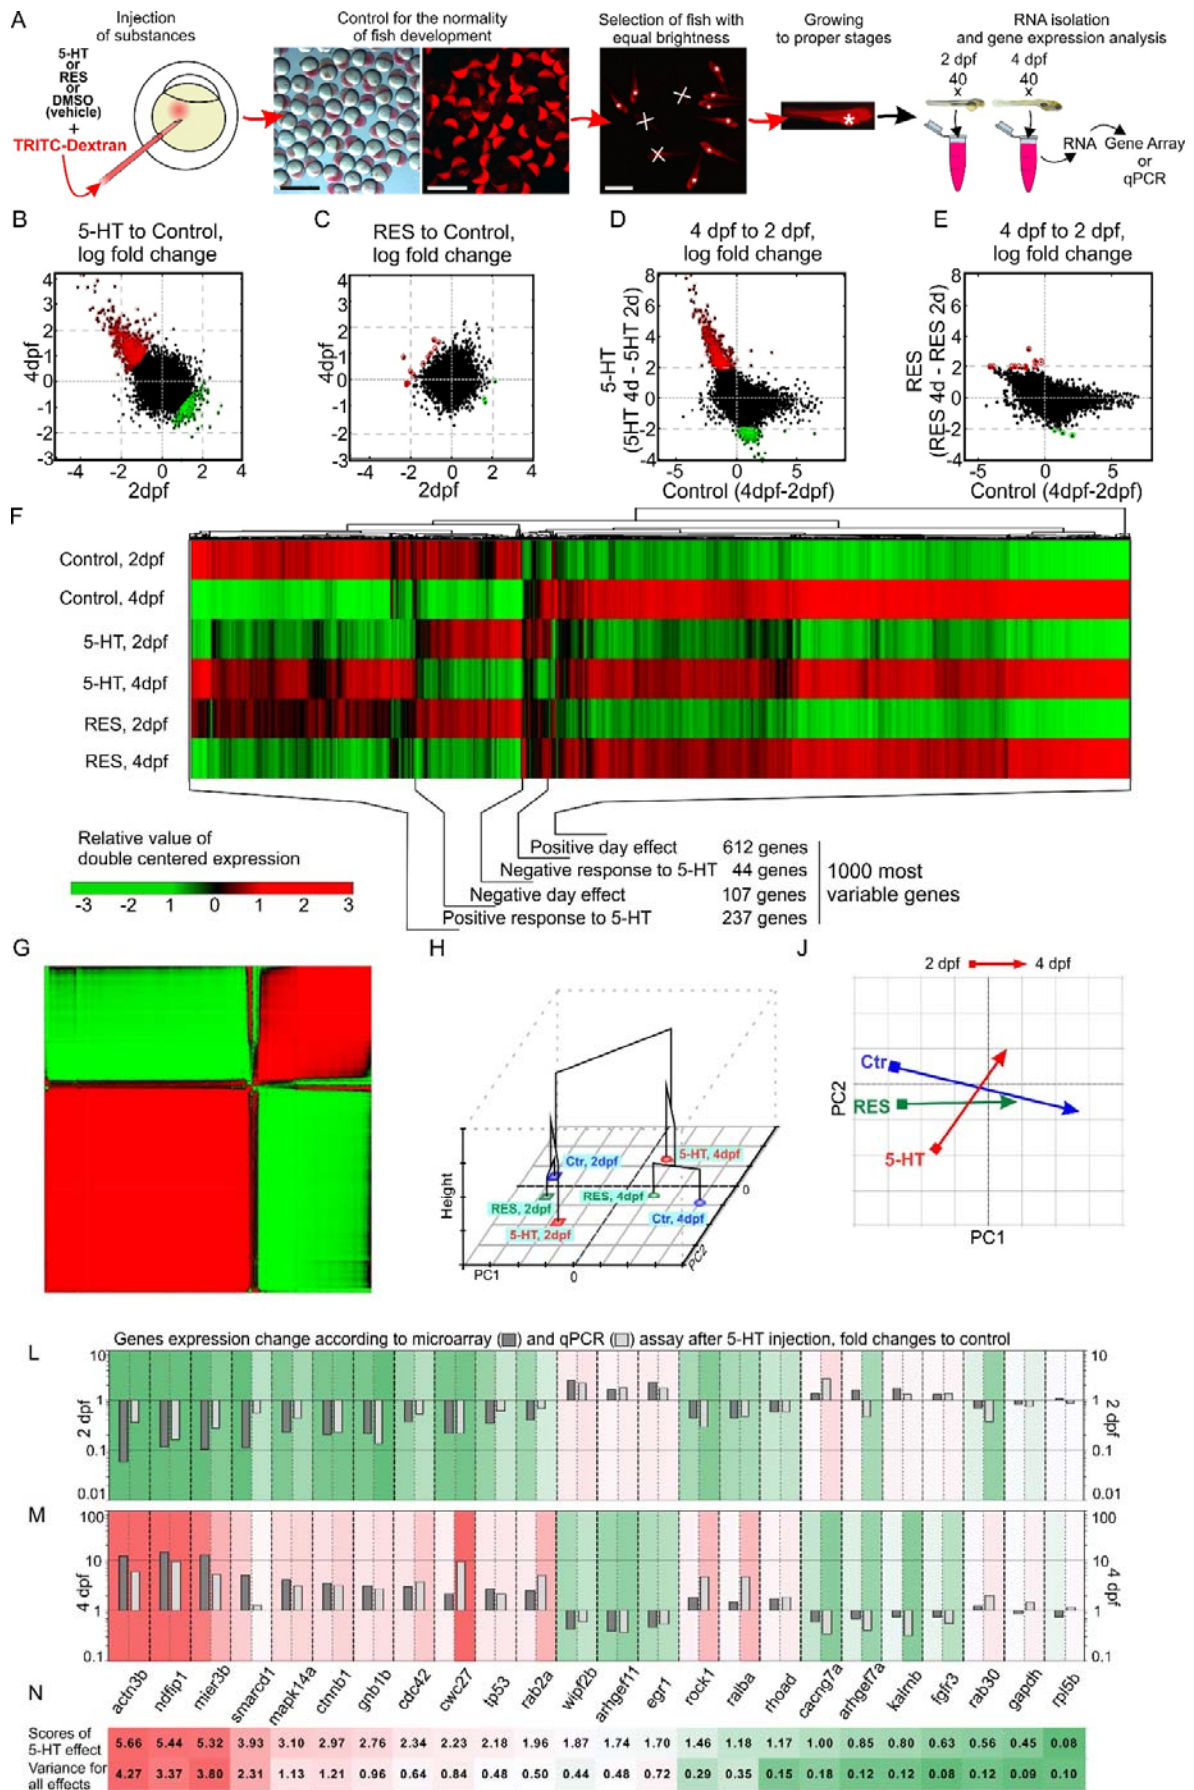

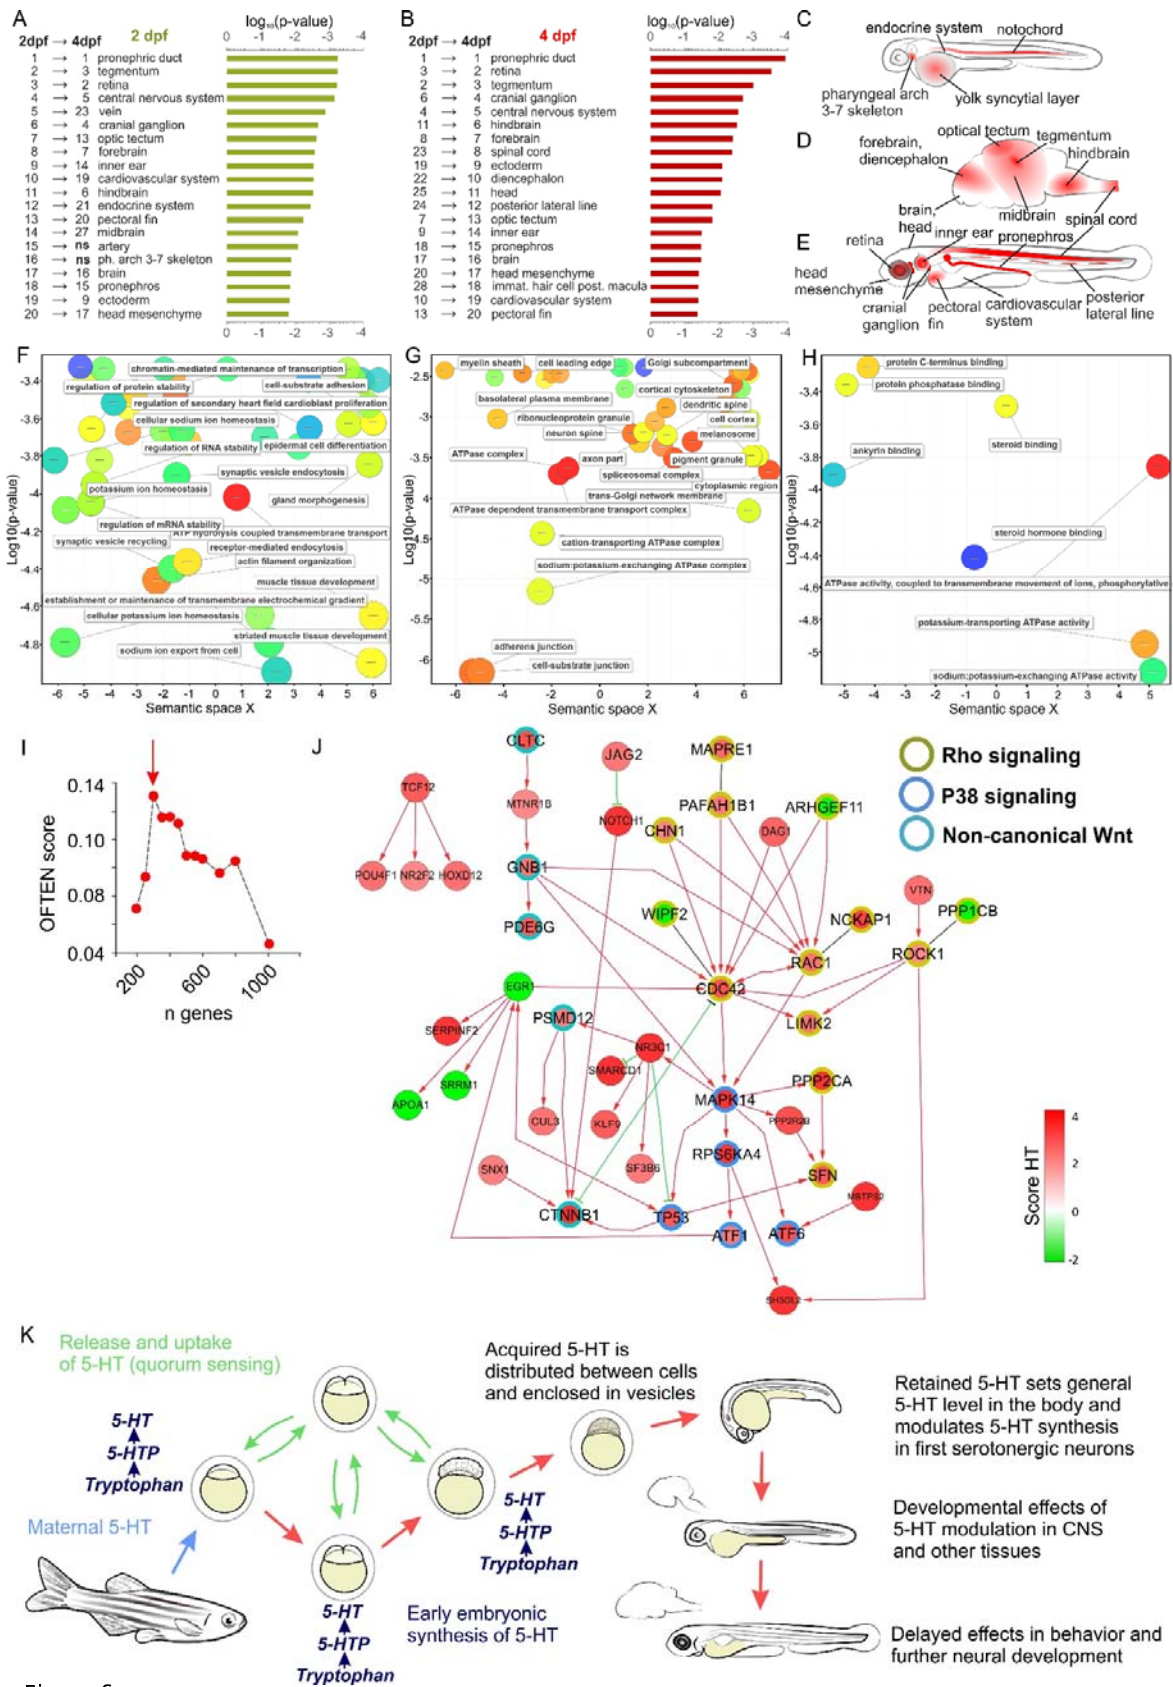

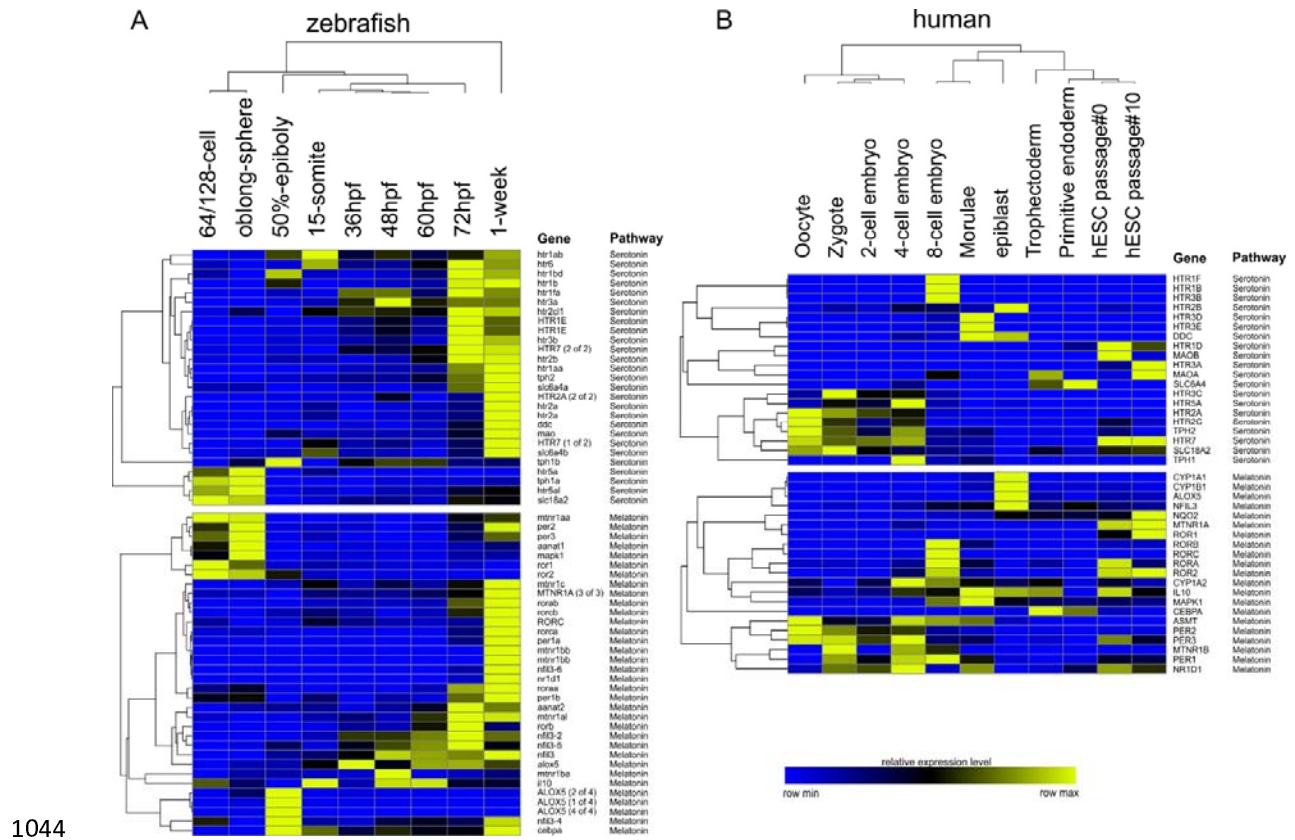

Figure S1

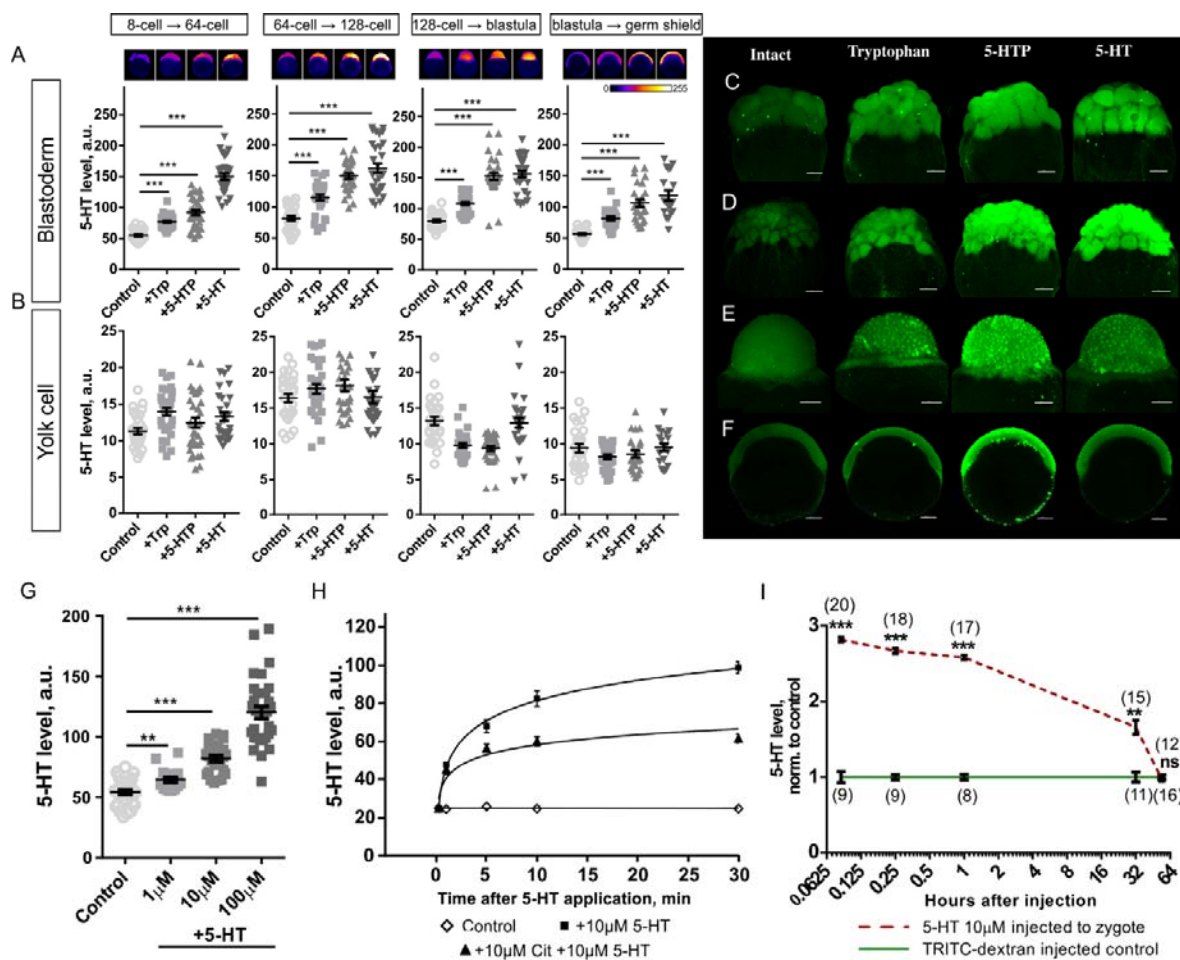

1045

Figure S2



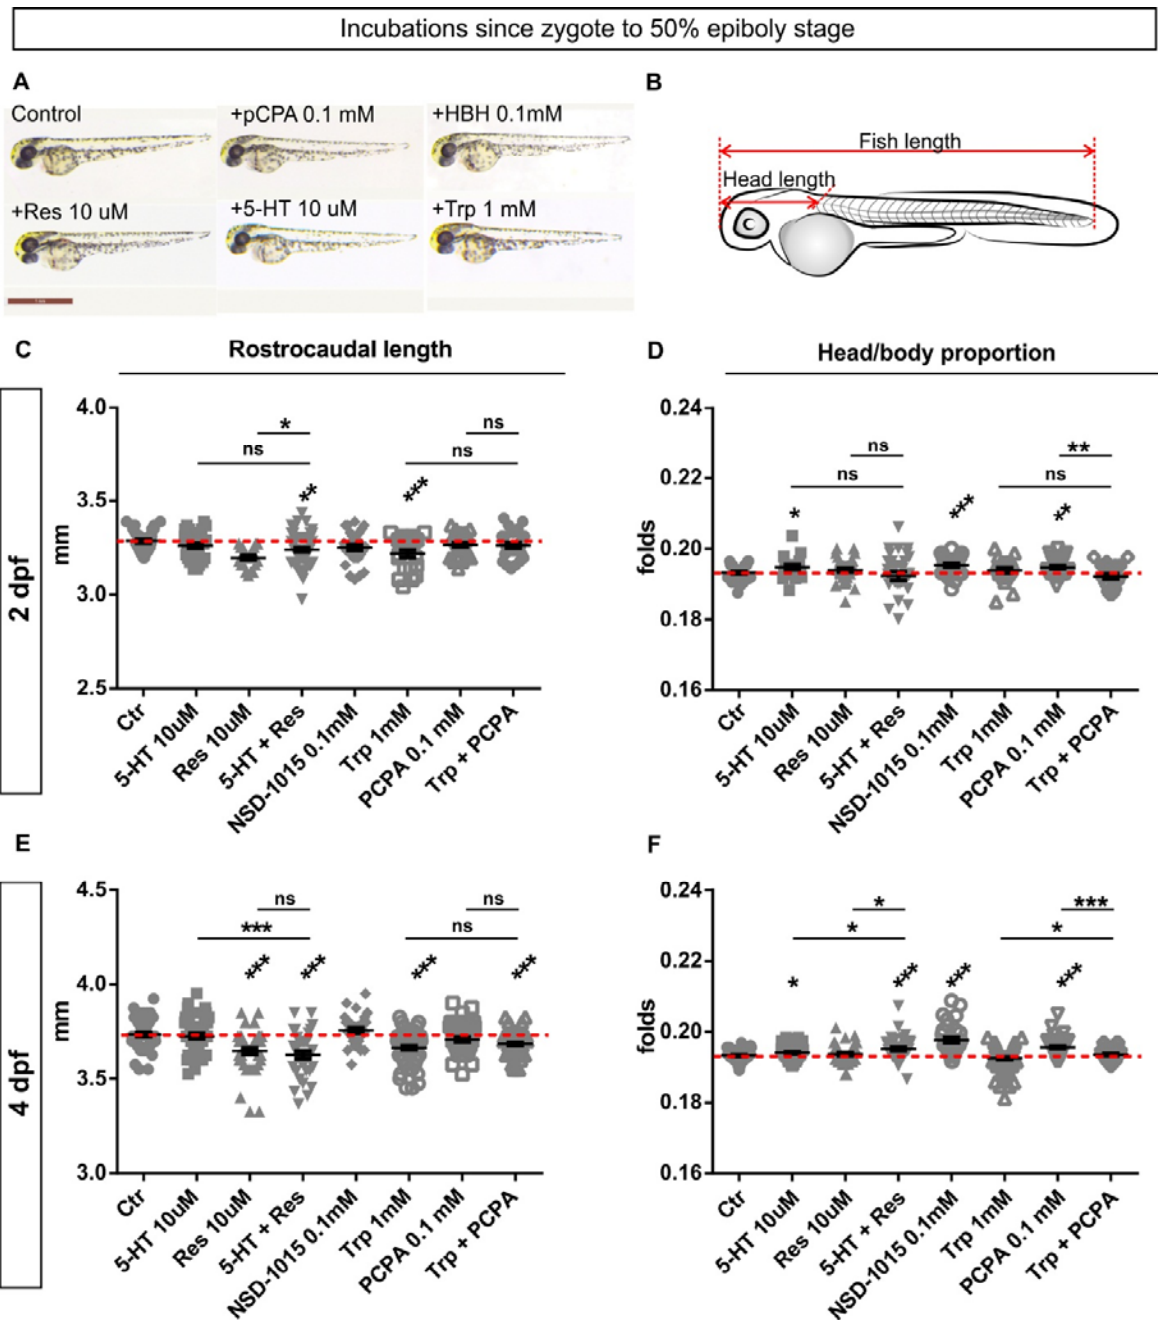

1046

Figure S3

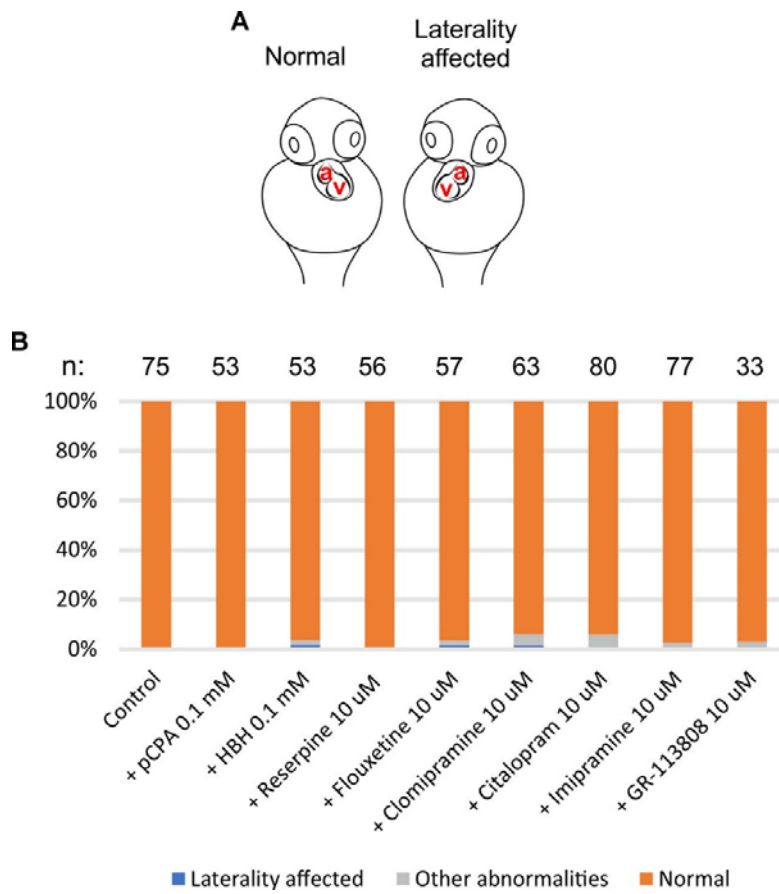

1047

Figure S4



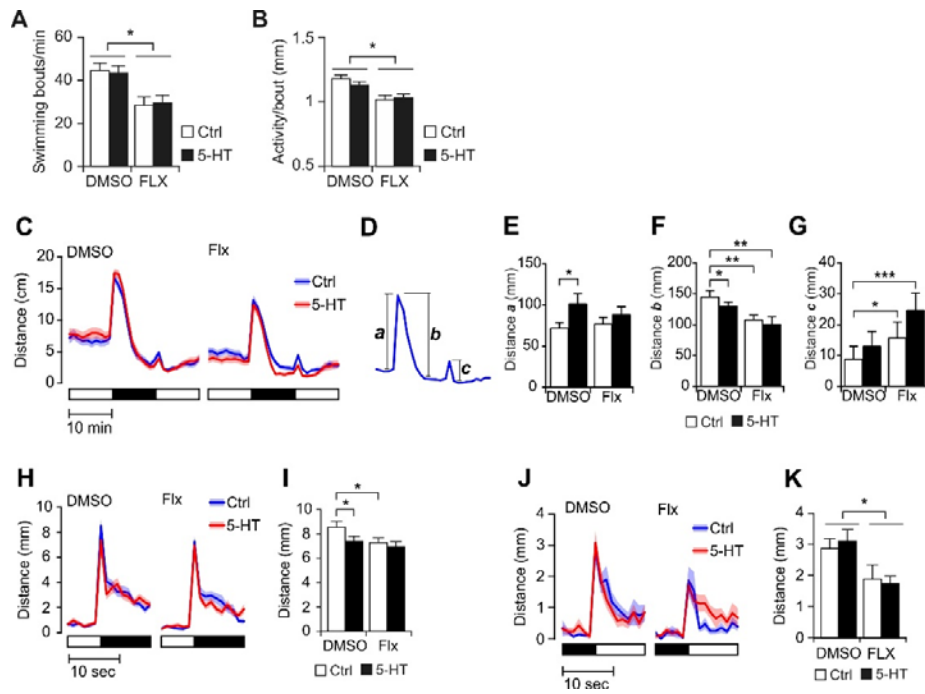

1049

Figure S6

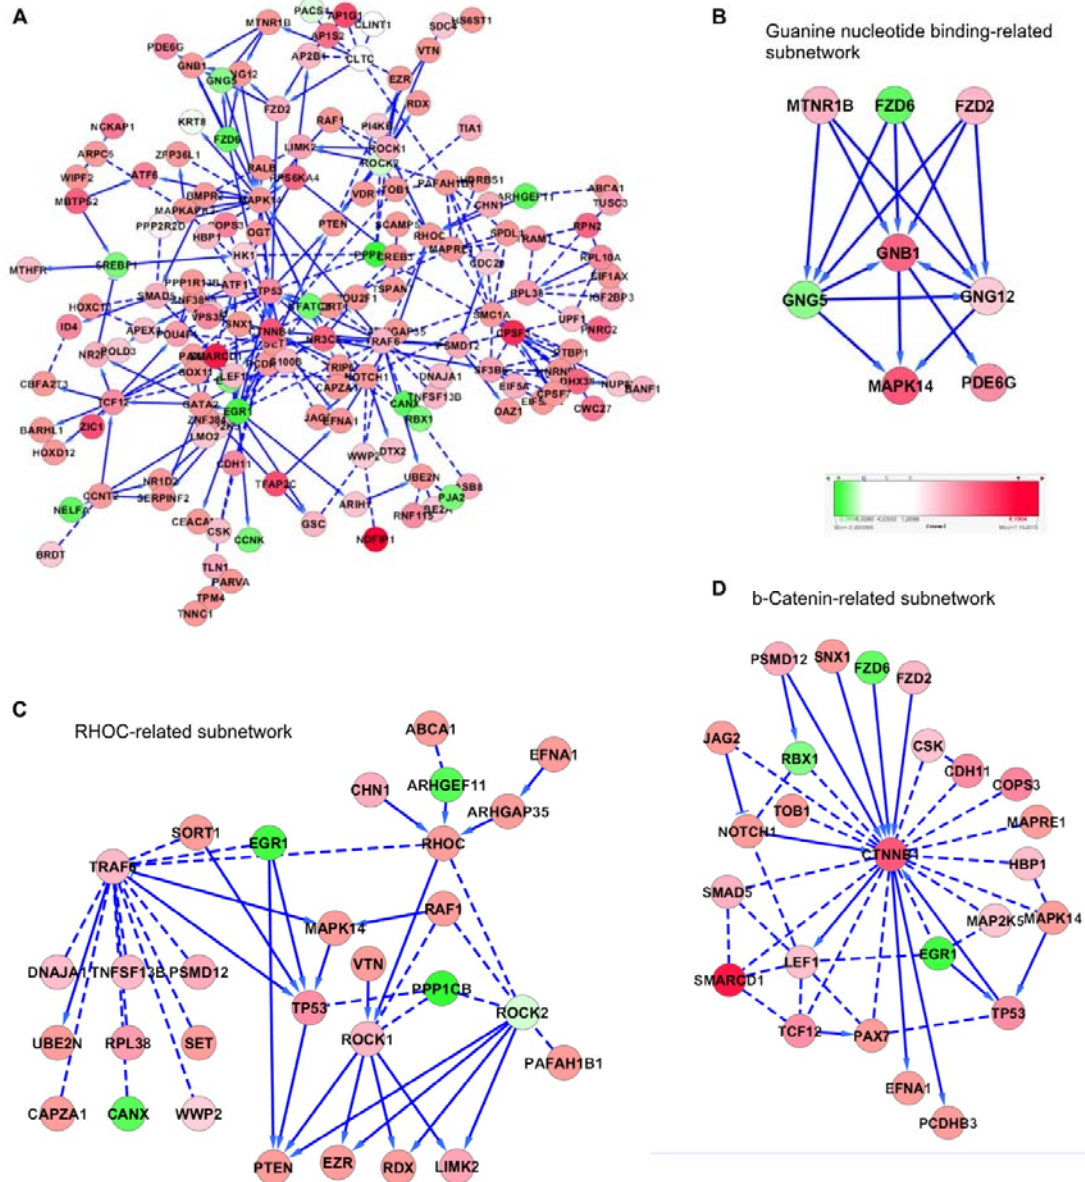

1050

Figure S7

1051 Supplementary File 1: Transcriptomic data collected for assessing the transcriptomic response to  
1052 injections of 5-HT and reserpine to zygote at day 2 and day 4 of the developmental course (Excel  
1053 file). Results of the gene set enrichment analysis (GSEA). List of anatomical GO terms obtained  
1054 using ZEOGS tool.

1055 Supplementary File 2: PCR primers used in this study.

1056

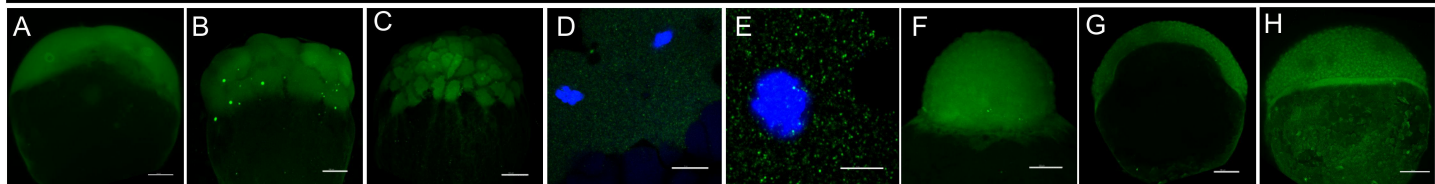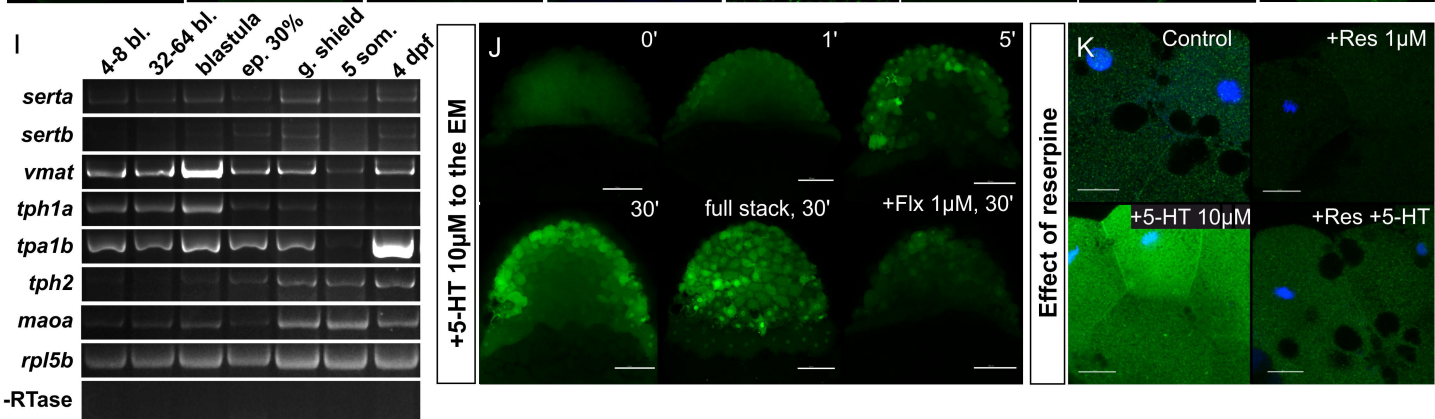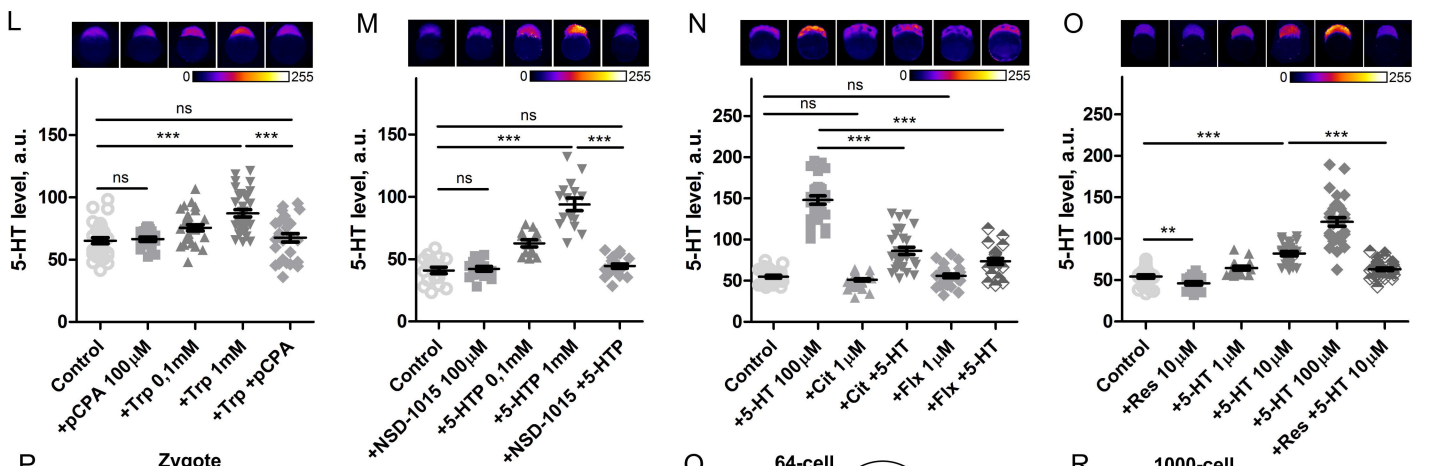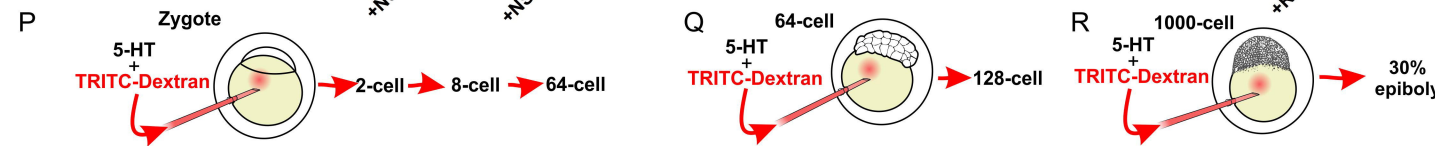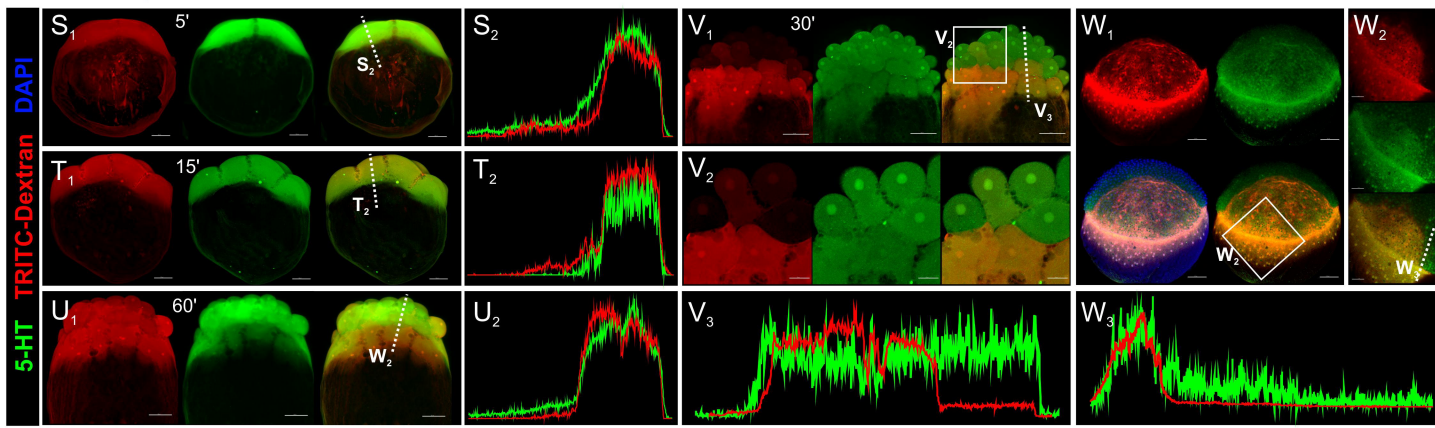

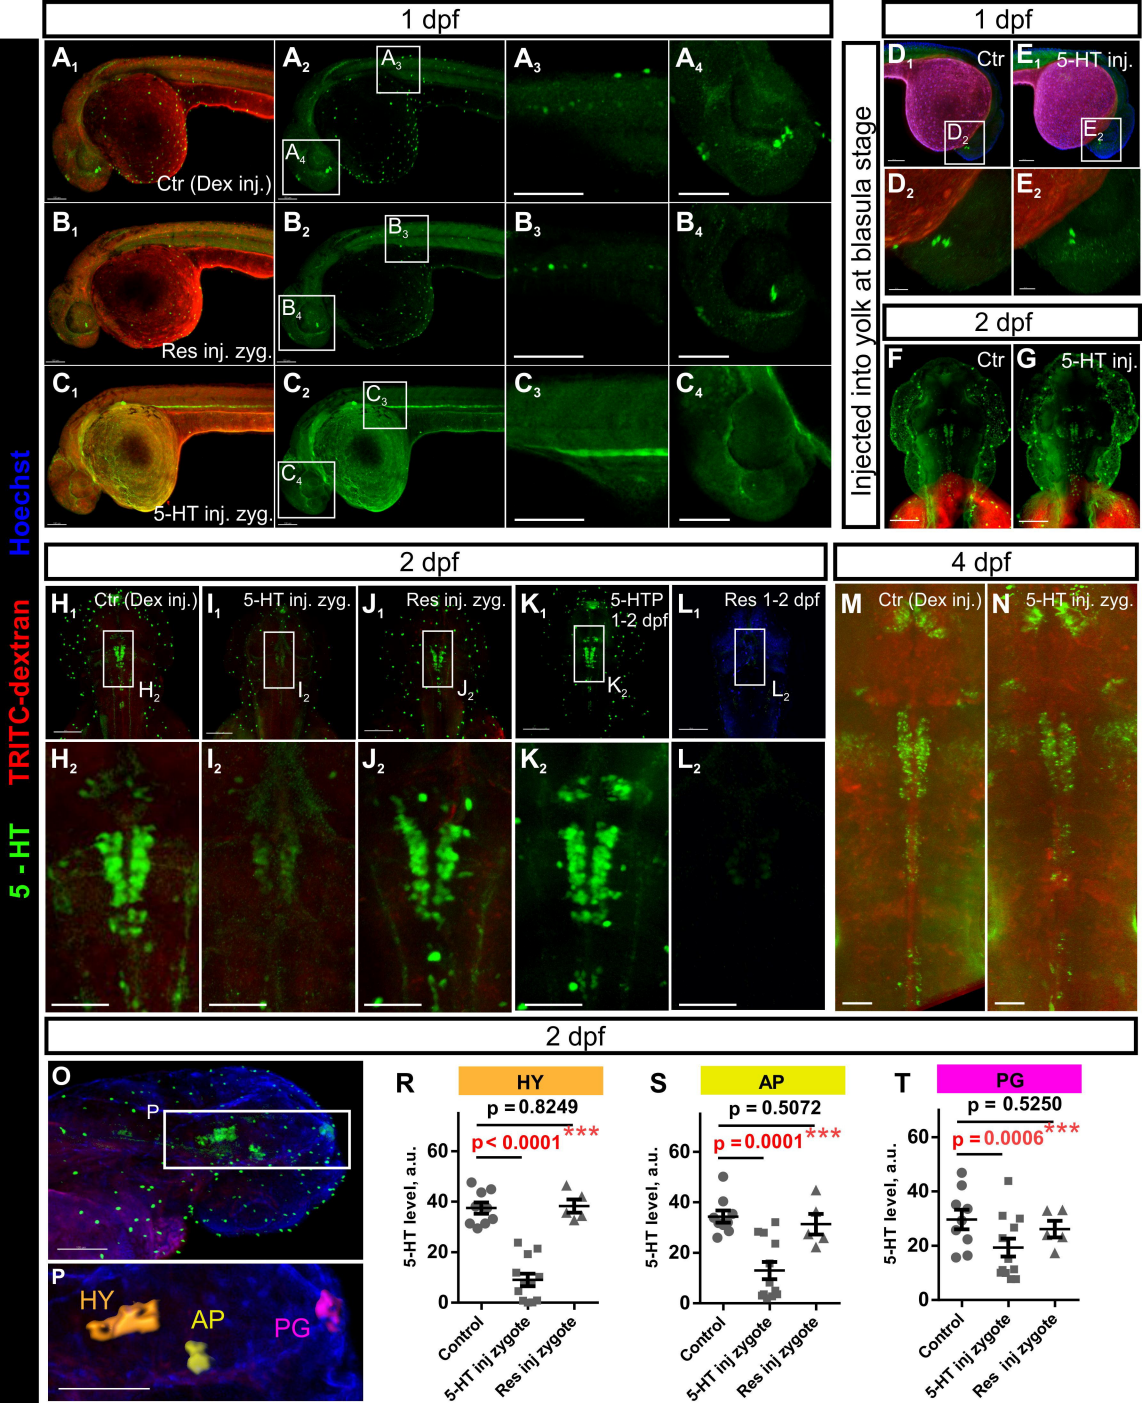



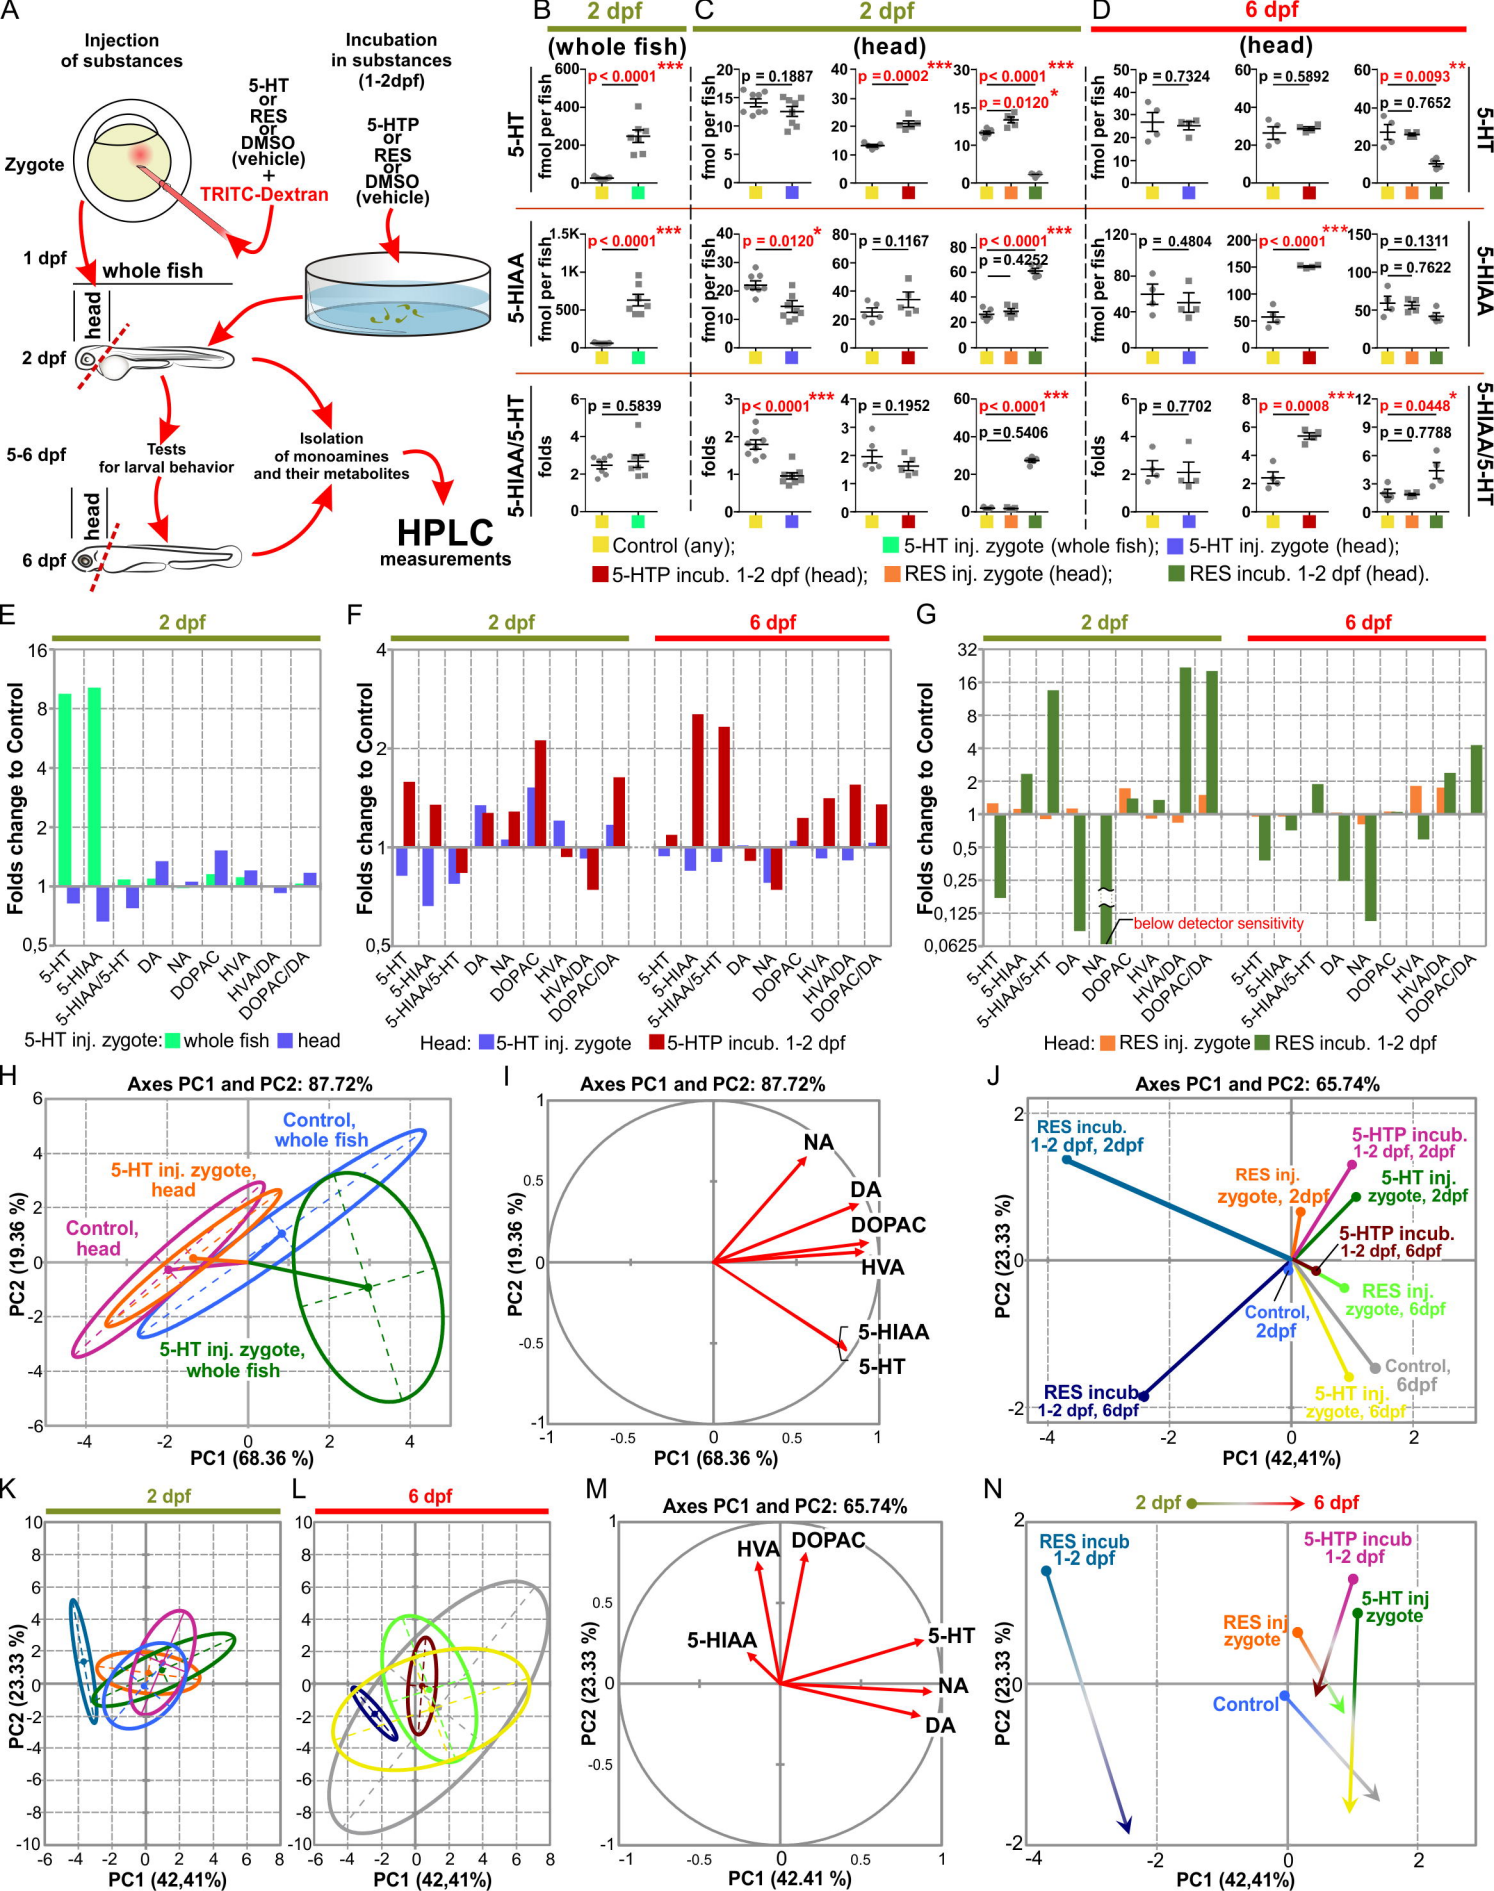

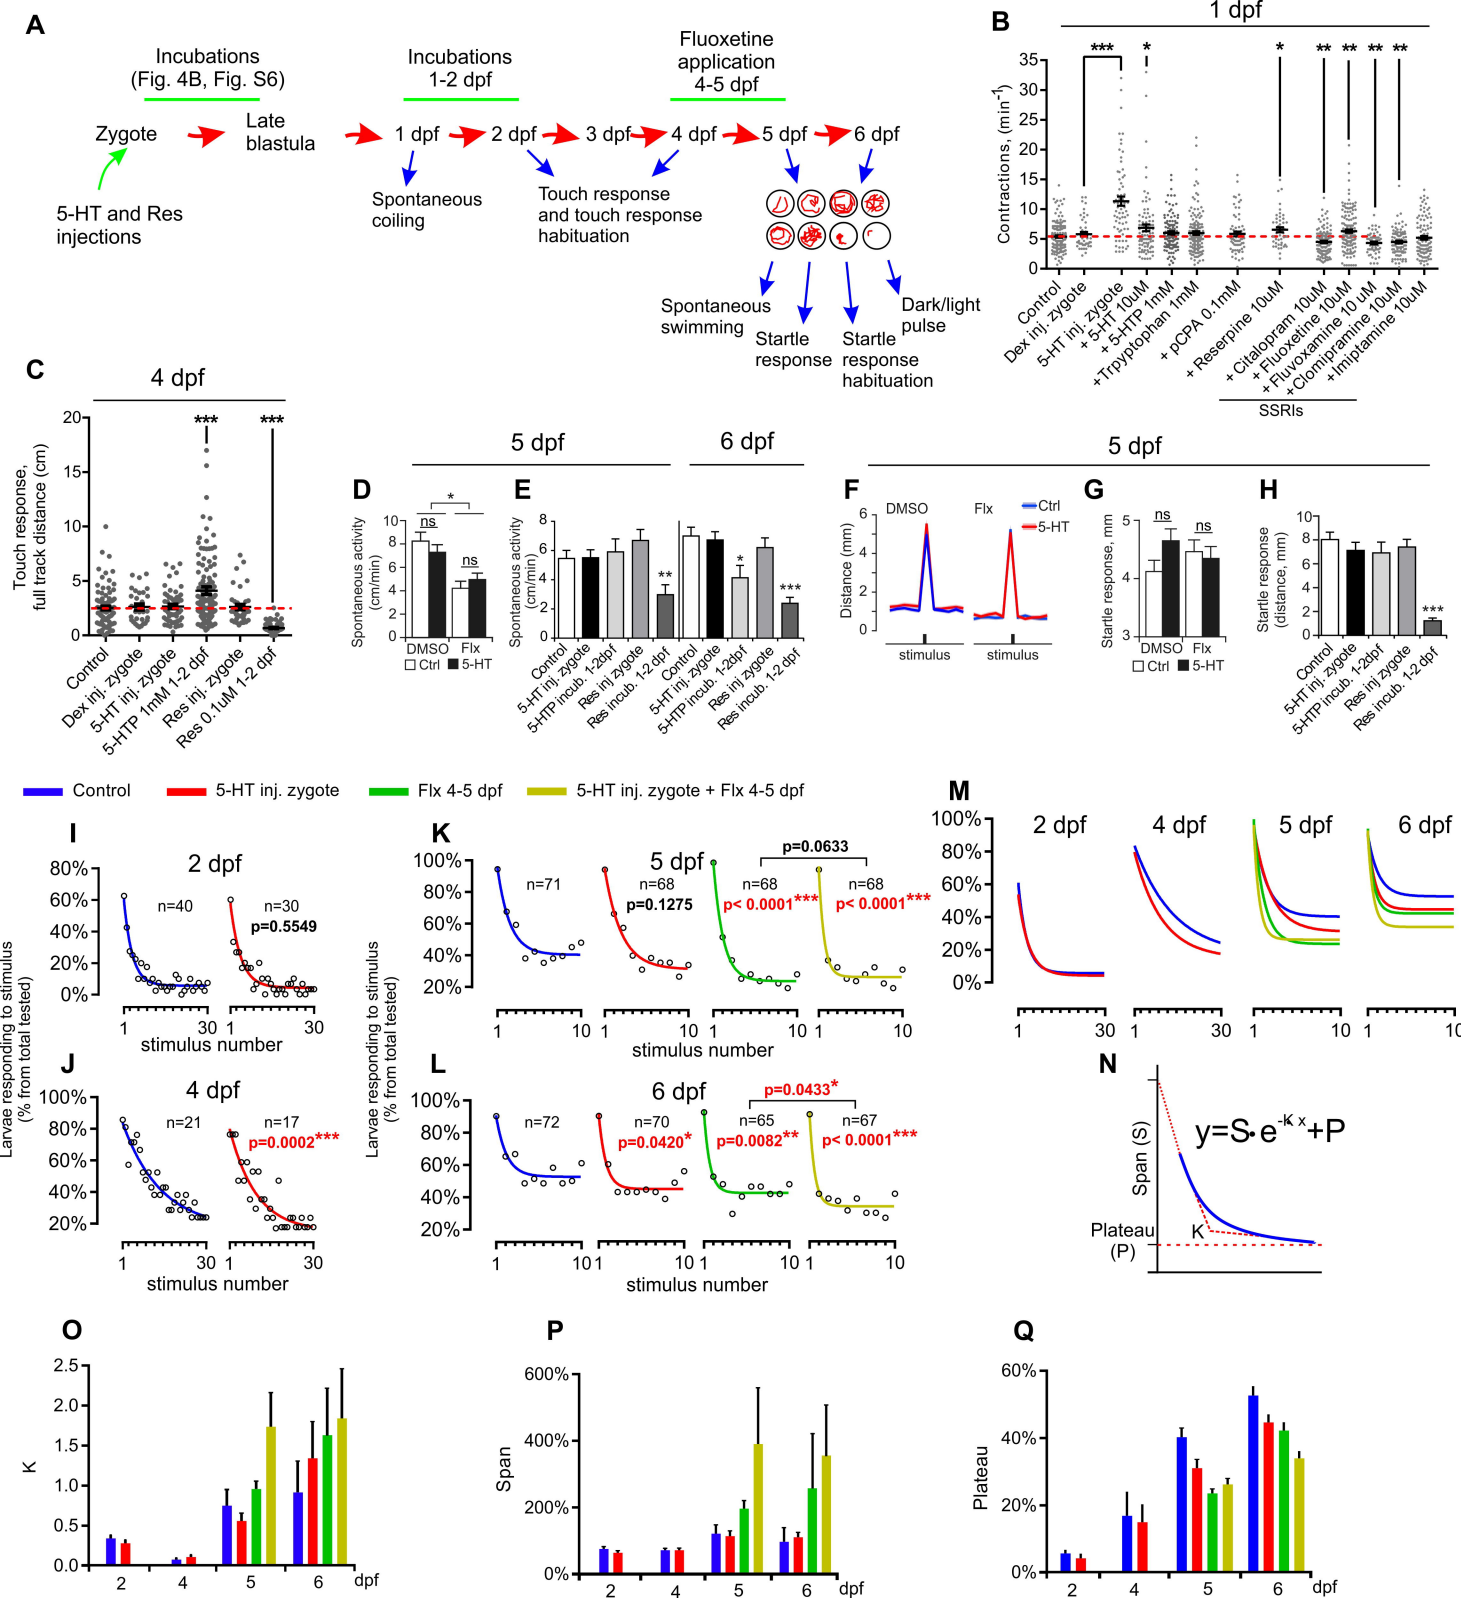

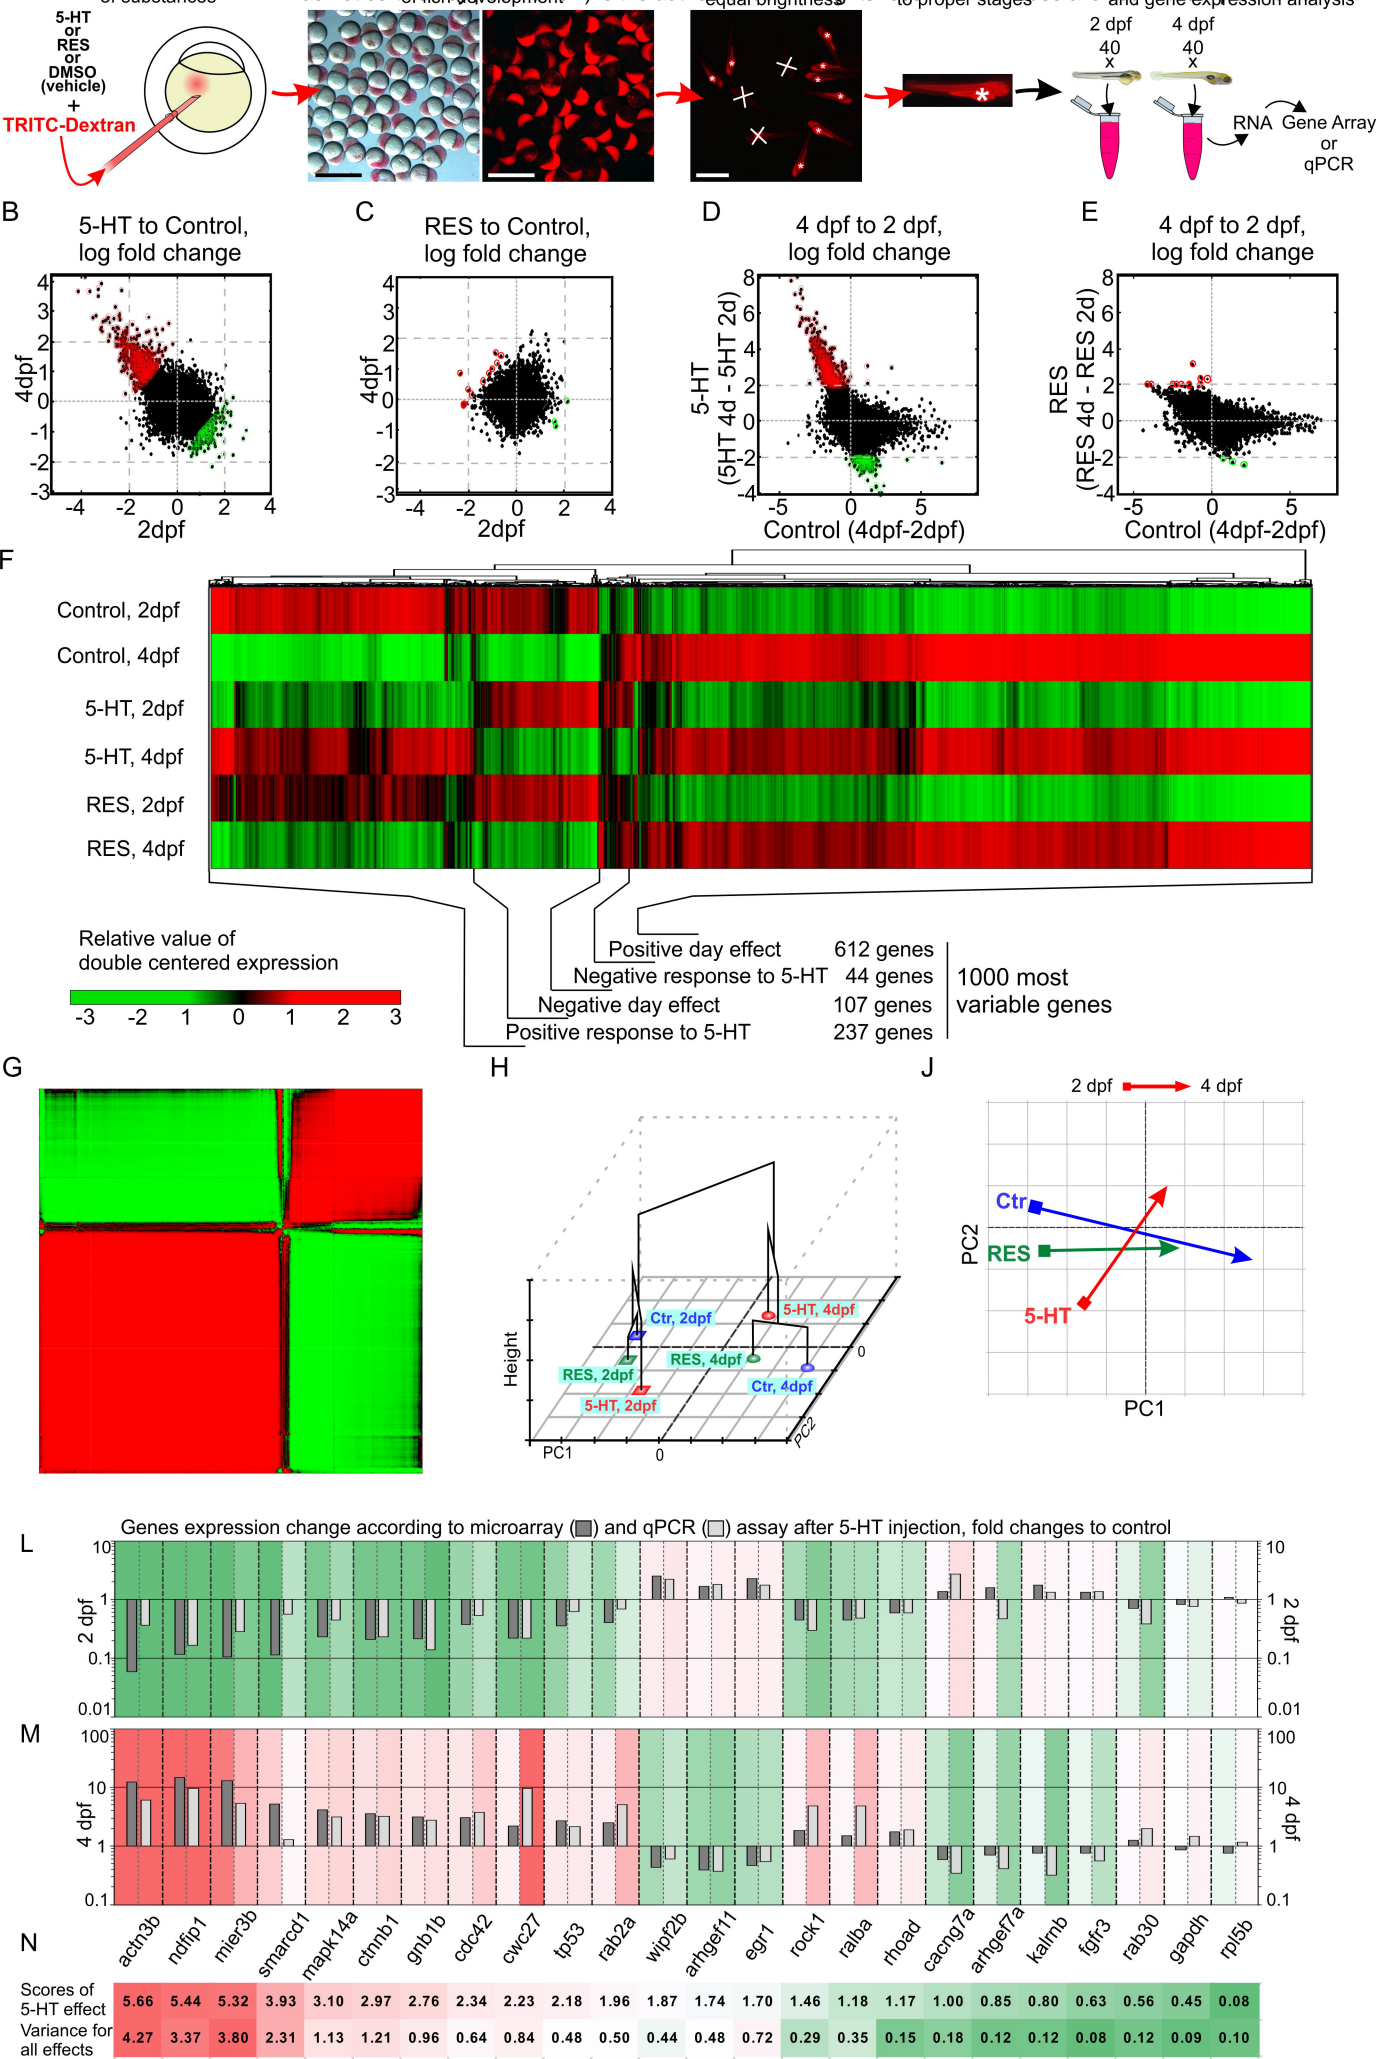

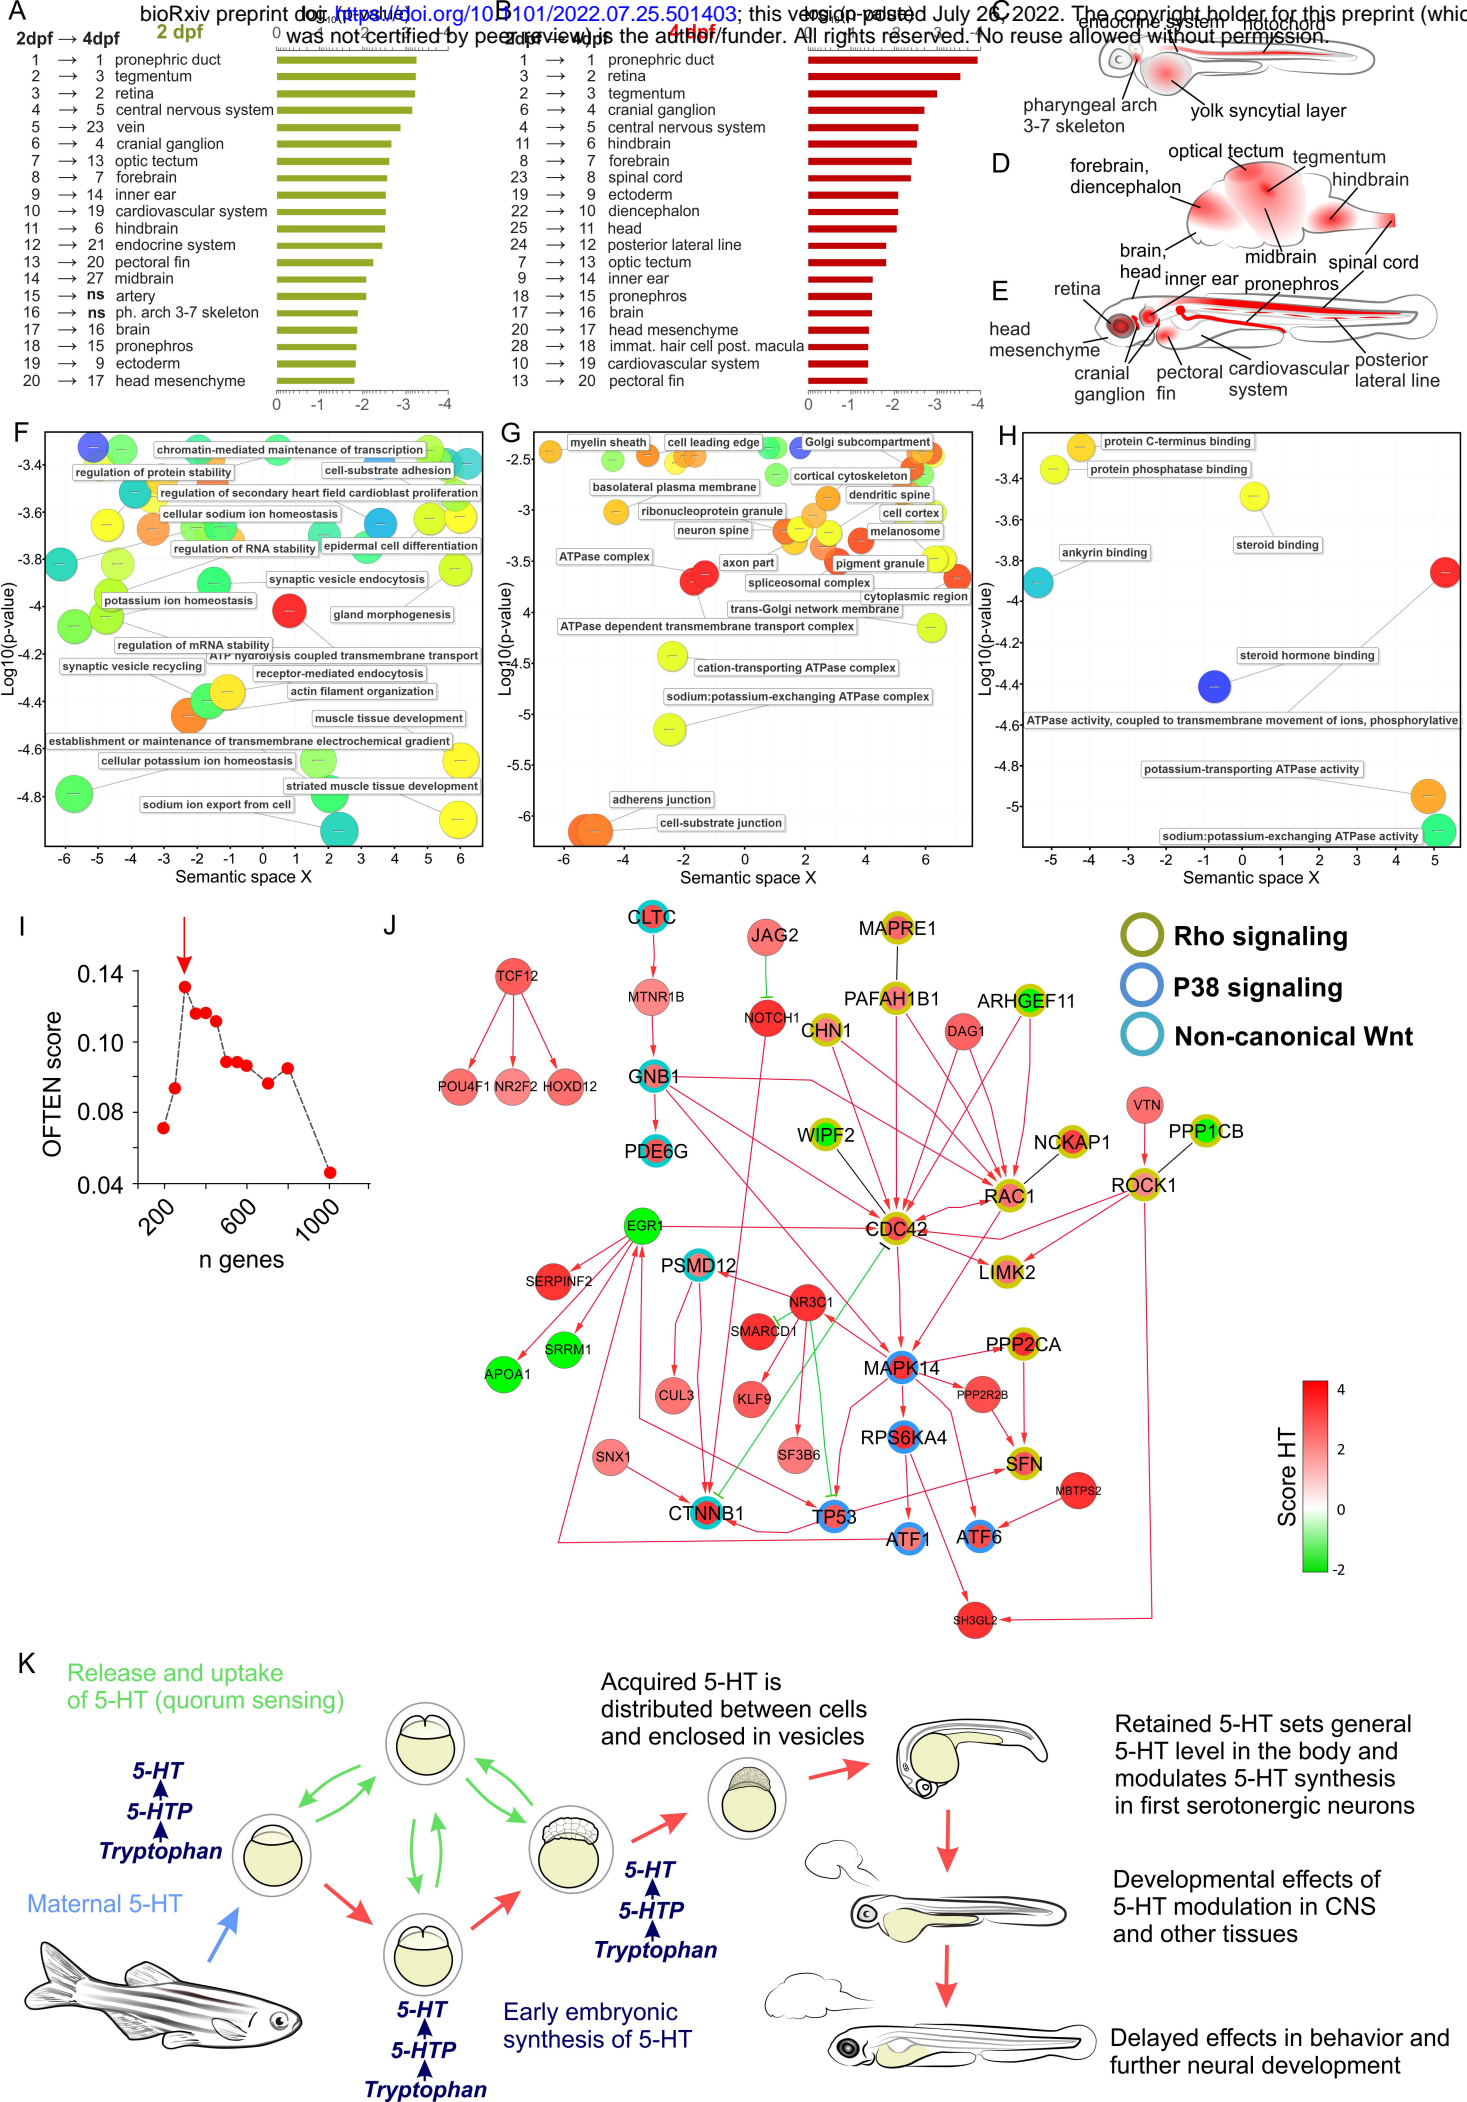

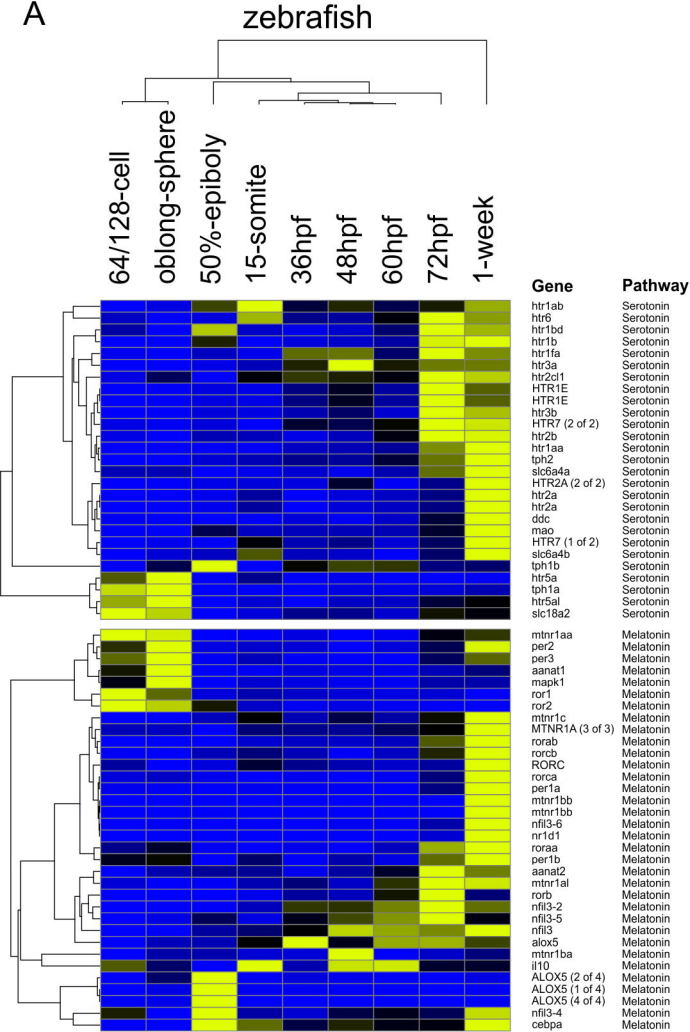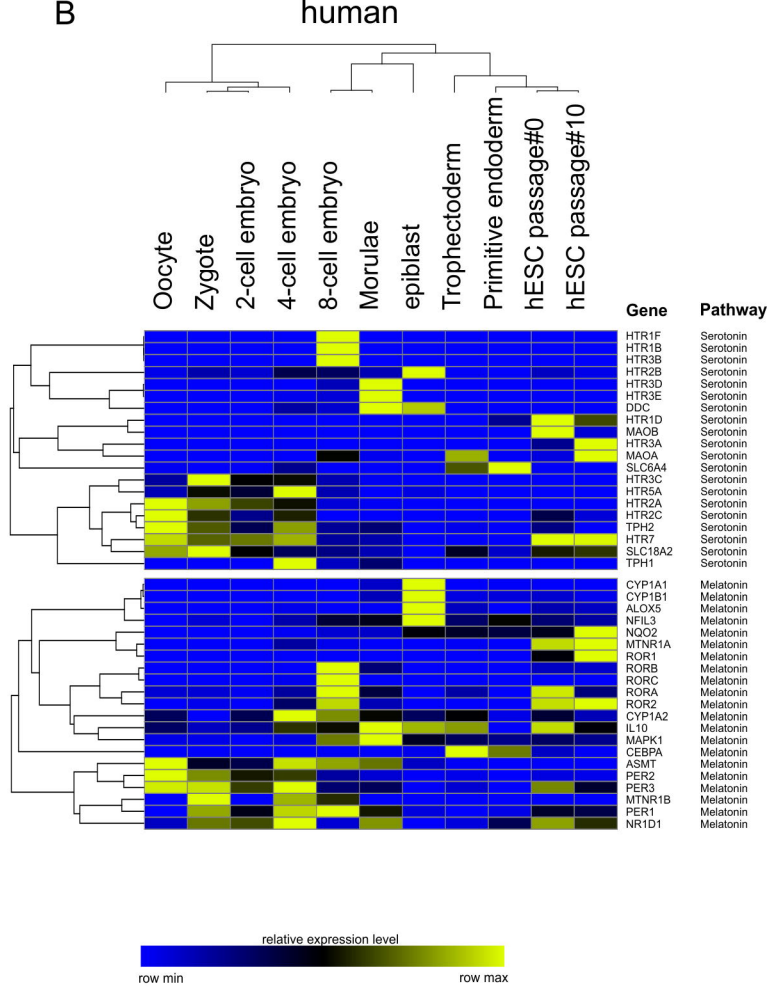

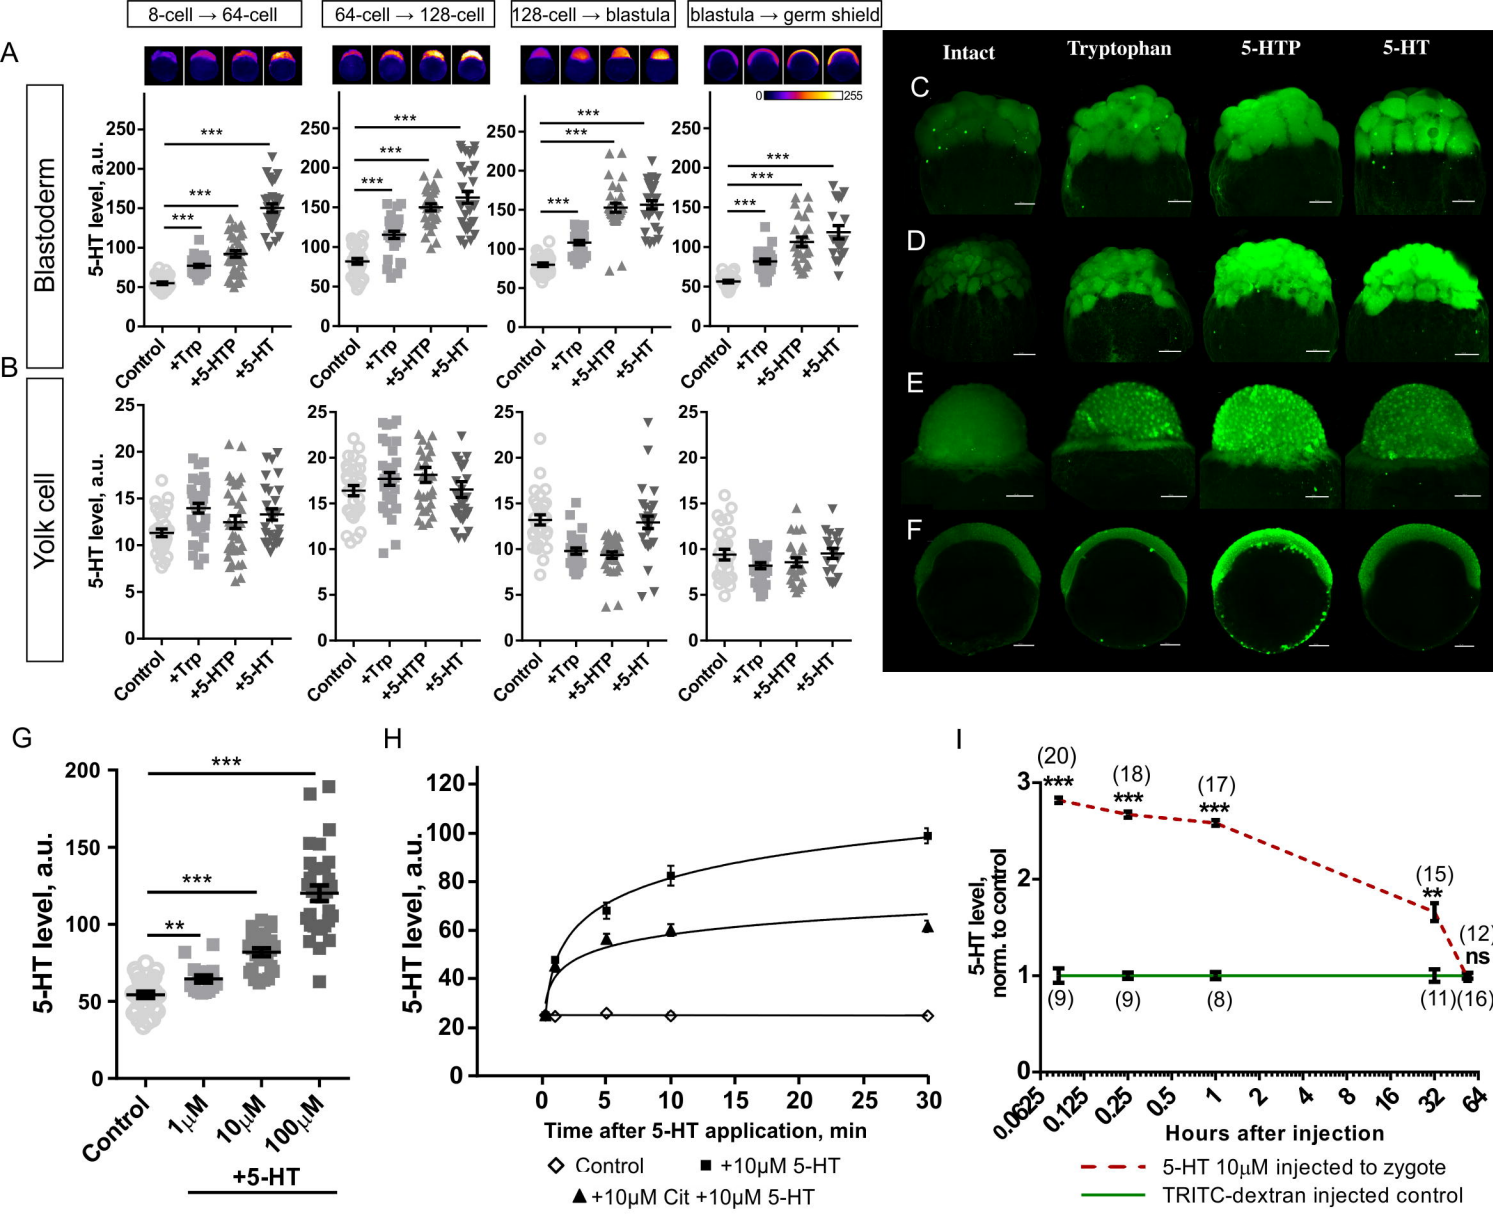

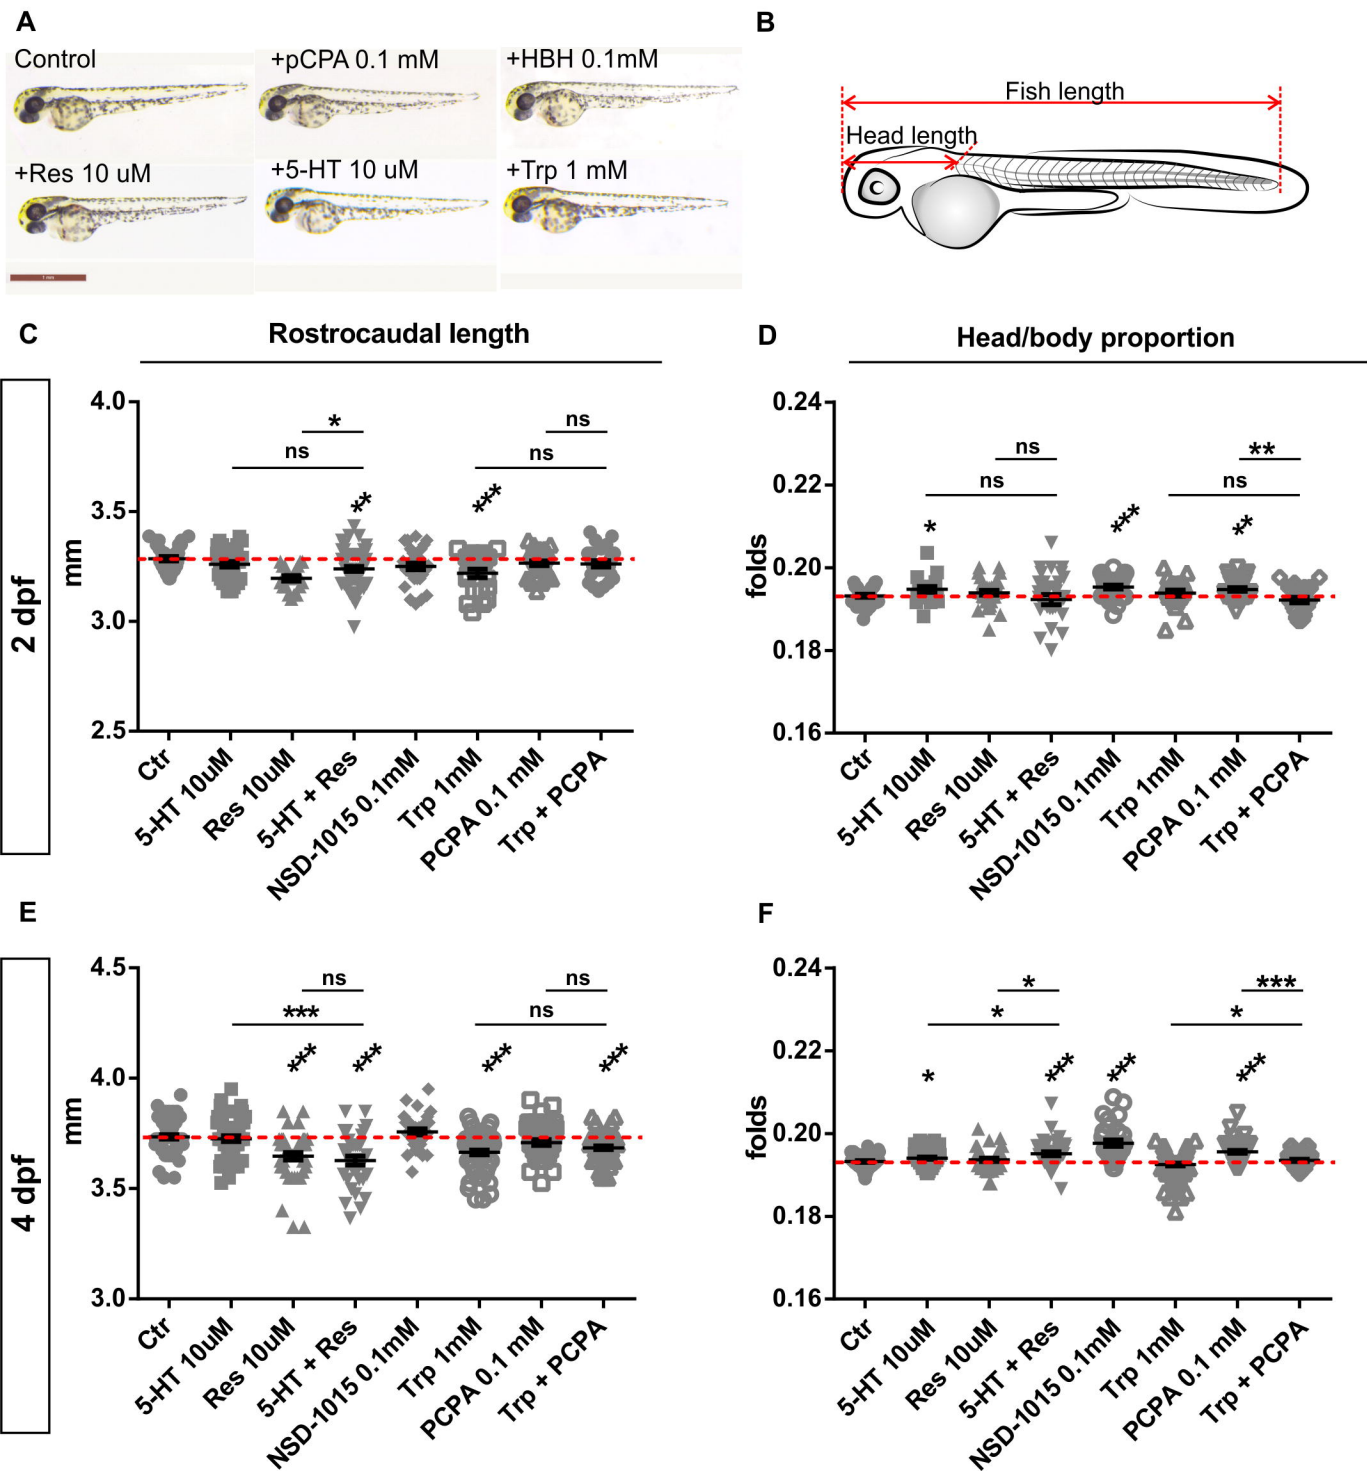

**A**

Normal

Laterality affected

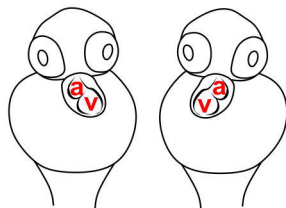**B**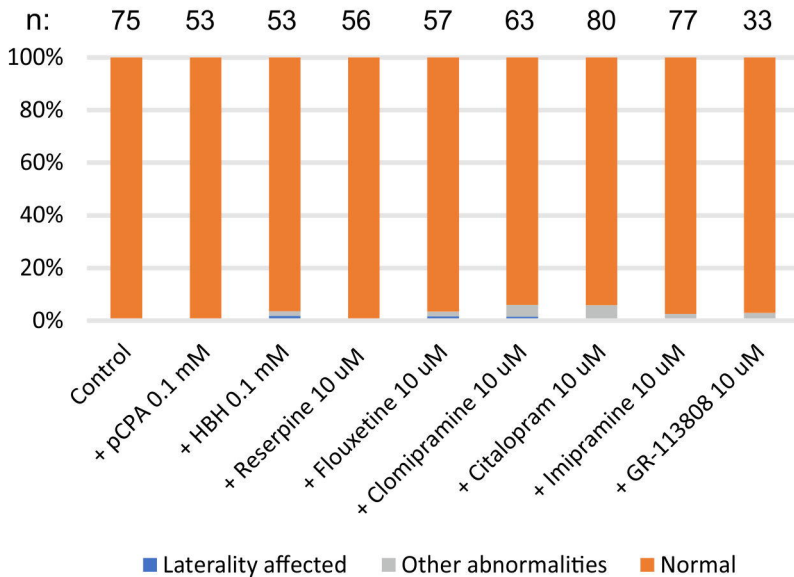





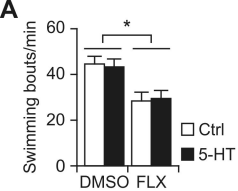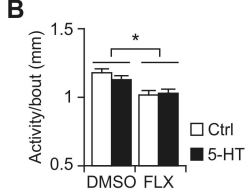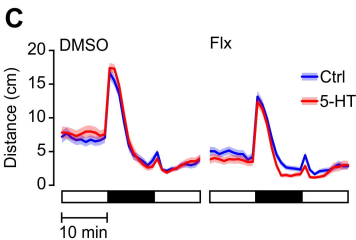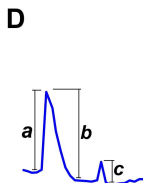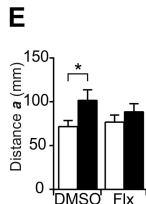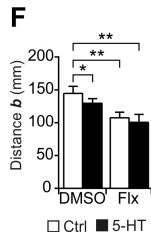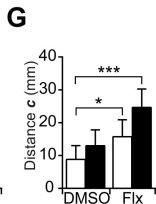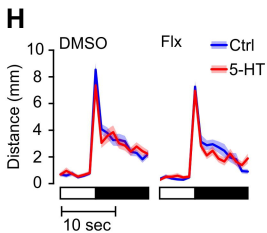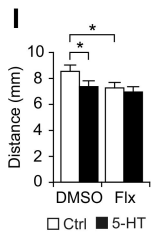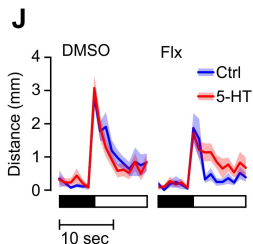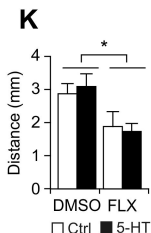

Source: https://www.biorxiv.org/content/10.1101/2022.07.25.501403v1.full.pdf
